# Supplementary material for: Differential Selective Pressures Experienced by the Aurora Kinase Gene Family
Source: MDPI journal article supplement (doi:10.3390/ijms19010072), 2017-12-28
Supplement: s1 [file s1]

## MATLAB multiple sequence alignment

|                  |                                                             |     |
|------------------|-------------------------------------------------------------|-----|
| lcl NM_198436.2  | ITELANALSYCHSKRVIHRDIKPENLLGSAGELKIADFGWSVHAPSSRRRTLCTGLDYL | 296 |
| lcl XM_01514873  | ITELANALSYCHSKRVIHRDIKPENLLGSAGELKIADFGWSVHAPSSRRRTLCTGLDYL | 296 |
| lcl NM_001038082 | ITELANALSYCHSKRVIHRDIKPENLLGSAGELKIADFGWSVHAPSSRRRTLCTGLDYL | 296 |
| lcl NM_00114250  | ITELANALSYCHSKRVIHRDIKPENLLGSAGELKIADFGWSVHAPSSRRRTLCTGLDYL | 296 |
| lcl XM_00563519  | ITELADALSYCHSKRVIHRDIKPENLLGSAGELKIADFGWSVHAPSSRRRTLCTGLDYL | 297 |

|                   |                                                       |         |     |
|-------------------|-------------------------------------------------------|---------|-----|
| 1c1   XM_00398335 | ITELADALSYCHSKRVIHRDIKPENLLLSGAGELKIADFGWSVHAPSSRRRTL | CGTLDYL | 297 |
| 1c1   XM_00567303 | ITELANALSYCHSKRVIHRDTPENLLLSGAGELKIADFGWSVHAPSSRRRTL  | CGTLDYL | 296 |
| 1c1   XM_00148927 | ITELANALAYCHSKRVIHRDIKPENLLLSGAGELKIADFGWSVHAPSSRRRTL | CGTLDYL | 296 |
| 1c1   XM_00443024 | ITELANALAYCHSKRVIHRDTPENLLLSGAGELKIADFGWSVHAPSSRRRTL  | CGTLDYL | 297 |
| 1c1   XM_00827414 | ITELANALLYCHSKRVIHRDIKPENLLLSGAGELKIADFGWSVHAPSSRRRTL | CGTLDYL | 295 |
| 1c1   XM_01452869 | ITELTNALSYCHSKRVIHRDTPENLLLSGTGELKIADFGWSVHAPSSRRRTL  | CGTLDYL | 296 |
| 1c1   XM_00468690 | ITELADALSYCHSKRVIHRDIKPENLLLSGAGELKIADFGWSVHAPSSRRRTL | CGTLDYL | 297 |
| 1c1   XM_00341990 | ITELADALSYCHSKRVIHRDTPENLLLSGTGELKIADFGWSVHAPSSRRRTL  | CGTLDYL | 298 |
| 1c1   XM_00432103 | ITELANALSYCHSKRVIHRDIKPENLLLSGSGELKIADFGWSVHAPSSRRRTL | CGTLDYL | 296 |

```
lclNM_198436.2 RDLISRLKHNPSQRPMLREVL EHPWITANSKKPSNQNKESASKQS*-- 404
lclNM_01514873 RDLISRLKHNPSQRPMLREVL EHPWITANSKKPSNQNRYN*----- 399
lclNM_00103802 RDLISRLKHNPSQRPRTLKEVLEHPWITANSKPPSSQKKKESASKQS*-- 400
lclNM_00114250 RDLISRLKHNPSQRPRTLKEVLEHPWITANSKPPSSQKKKESASKQS*-- 403
lclXM_00563519 RDLISRLKHNPSQRPRTLKDVL EHPWIMANSKKPSSSQKNKDSTSKQS* 406
lclXM_00398335 RDLISRLKHNPSQRPRTLKEVLEHPWITANSKKPSGSKSKESTGKQS* 406
lclXM_00567303 RDLISRLKHNPSHRPTLKEVLEHPWITANSKPASSHKKESSTKQP*-- 403
lclXM_00148927 RDLISRLKHNPSQRPRTLKEVLEHPWITANSKKPSNSQKSKESTSKQP* 405
lclXM_00443024 RDLISRLKHNPSQRPRTLKEVLEHPWITANASKKPSNSQKSKESTSKQS* 406
lclXM_00827416 KDFISRLKHNPSHRPTLAEVLEHPWIAKSSKPPSSCPDKKESASKQS*-- 403
lclXM_01452869 RDLISRLMHNNQRLTLKEVLEHPWITANSKKPSSSQKKKESASKQS* 405
lclXM_00468690 RDLISRLKHNPSQRPRTLKEVLEHPWITANSKKPPSSQKNKESSTSKQS* 406
lclXM_00341990 RDLVSRLLKHNPSQRLTLKEVLEHPWITANSKKPPSSQNKESSTSKQS*-- 406
lclXM_00432103 RDLISRLKHNPSQRPRTLKEVLEHPWITANSKPPSSQKKESASKQS*-- 403
***** * * * ***** *
```
