# Supplementary material for: Differential Selective Pressures Experienced by the Aurora Kinase Gene Family
Source: MDPI journal article supplement (doi:10.3390/ijms19010072), 2017-12-28
Supplement: s1 [file s1]

**Figure S1.** Alignment of AK sequences spanning major taxonomic groups. The alignment of 137 animal, fungal, protist, and plant AK sequences used to construct the phylogenetic tree.

CLUSTAL W(1.81) multiple sequence alignment

```

XP_020952967.1/1-297 -----
XP_012380002.1/1-290 -----
XP_006102660.1/1-339 -----
XP_005673091.1/1-402 -----
XP_004484680.1/1-405 -----
XP_004462482.1/1-349 -----
Q6NW76.1/1-320 -----
NP_999084.2/1-344 -----
gi|1190438012|ref|XP_020822491.1|/1-365 -----
gi|1190373986|ref|XP_020837071.1|/1-405 -----
gi|1154067554|ref|NP_001153906.2|/1-332 -----
gi|1131237831|ref|XP_019799799.1|/1-344 -----
gi|1131178530|ref|XP_019784431.1|/1-296 -----
gi|1126479796|ref|XP_006940862.2|/1-308 -----
gi|1113784803|ref|XP_019353949.1|/1-376 -----
gi|1022987698|ref|XP_016286291.1|/1-365 -----
gi|966994491|ref|XP_014974040.1|/1-344 -----
gi|966965902|ref|XP_015004225.1|/1-398 -----
gi|955535802|ref|XP_004439167.2|/1-335 -----
gi|951053762|ref|XP_014465099.1|/1-416 -----
gi|946796851|ref|XP_014384184.1|/1-404 -----
gi|946756071|ref|XP_014392719.1|/1-299 -----
gi|922383691|ref|XP_013462066.1|/1-300 -----
gi|909794683|ref|XP_013153467.1|/1-419 -----
gi|891599507|ref|XP_013025412.1|/1-351 -----
gi|891565640|ref|XP_013019059.1|/1-351 -----
gi|884853217|ref|XP_013010870.1|/1-315 -----
gi|830244266|ref|XP_012590158.1|/1-296 -----
gi|828211890|ref|XP_012558808.1|/1-339 -----
gi|820033943|ref|NP_001295465.1|/1-282 -----
gi|795377289|ref|XP_011750175.1|/1-471 MRTPWVYALFMLSGPLSPPPRRTLCLLPSRASPLGLAFRAQPRPARSSSAPTRGPWAESE
gi|779989227|ref|XP_011666707.1|/1-321 -----
gi|761905244|ref|XP_011402440.1|/1-385 -----
gi|759175630|ref|XP_011377486.1|/1-303 -----
gi|759149200|ref|XP_011368486.1|/1-311 -----
gi|759116391|ref|XP_011357226.1|/1-339 -----
gi|758991346|ref|XP_957232.2|/1-420 -----
gi|743922878|ref|XP_011005517.1|/1-293 -----
gi|698438703|ref|XP_009757361.1|/1-296 -----
gi|697188794|ref|XP_009603442.1|/1-294 -----
gi|658871623|ref|XP_008418750.1|/1-330 -----
gi|657559162|ref|XP_008283516.1|/1-424 -----
gi|657529148|ref|XP_008293493.1|/1-319 -----
gi|655887082|ref|XP_008247187.1|/1-292 -----
gi|655881324|ref|XP_008272369.1|/1-402 -----
gi|655868725|ref|XP_008268971.1|/1-343 -----
gi|641774253|ref|XP_008170712.1|/1-431 -----
gi|620969612|ref|XP_007654691.1|/1-303 -----
gi|617451788|ref|XP_007568855.1|/1-331 -----
gi|594674988|ref|XP_007185333.1|/1-402 -----
gi|594654199|ref|XP_007175509.1|/1-282 -----
gi|594623572|ref|XP_007166415.1|/1-344 -----
gi|584038001|ref|XP_006753367.1|/1-368 -----
gi|573912300|ref|XP_006643864.1|/1-292 -----
gi|554569173|ref|XP_005878848.1|/1-339 -----
gi|545541126|ref|XP_005635254.1|/1-405 -----
gi|545487136|ref|XP_005616134.1|/1-307 -----
gi|544514002|ref|XP_005590555.1|/1-471 MRTPWVYALFMLSGPLSPPPRRTLCLLPSRASPLGLAFRAQPRPARSSSAPTRGPWAESE
gi|530653727|ref|XP_005313062.1|/1-365 -----
gi|528993703|ref|XP_005219854.1|/1-303 -----
gi|524890835|ref|XP_005101959.1|/1-332 -----
gi|514776534|ref|XP_004968502.1|/1-292 -----
gi|507960369|ref|XP_004686961.1|/1-405 -----
gi|507953708|ref|XP_004684672.1|/1-344 -----
gi|478517838|ref|XP_004433150.1|/1-344 -----
gi|478512086|ref|XP_004430306.1|/1-405 -----
gi|470628341|ref|XP_004321082.1|/1-402 -----

```

gi|470261727|ref|XP\_004360485.1|/1-457 -----MNKTNATSGGMSTFKATSNAMKENHHPATTTTK  
gi|449486478|ref|XP\_002195961.2|/1-319 -----  
gi|426243291|ref|XP\_004015492.1|/1-303 -----  
gi|426237569|ref|XP\_004012730.1|/1-344 -----  
gi|410979749|ref|XP\_003996244.1|/1-344 -----  
gi|410953494|ref|XP\_003983405.1|/1-405 -----  
gi|410914403|ref|XP\_003970677.1|/1-332 -----  
gi|389641901|ref|XP\_003718583.1|/1-397 -----  
gi|389635857|ref|XP\_003715581.1|/1-400 -----  
gi|357126095|ref|XP\_003564724.1|/1-291 -----  
gi|355703962|gb|EHH30453.1|/1-309 -----  
gi|350538969|ref|NP\_001233545.1|/1-403 -----  
gi|347966592|ref|XP\_321274.5|/1-404 -----  
gi|345800233|ref|XP\_849906.2|/1-344 -----  
gi|344296517|ref|XP\_003419953.1|/1-405 -----  
gi|344290468|ref|XP\_003416960.1|/1-345 -----  
gi|344269722|ref|XP\_003406697.1|/1-306 -----  
gi|338709975|ref|XP\_001502047.3|/1-304 -----  
gi|334312551|ref|XP\_001378079.2|/1-402 -----  
gi|332848444|ref|XP\_511856.3|/1-344 -----  
gi|330793523|ref|XP\_003284833.1|/1-359 -----  
gi|321461440|gb|EFX72472.1|/1-304 -----  
gi|308497987|ref|XP\_003111180.1|/1-306 -----  
gi|302801442|ref|XP\_002982477.1|/1-288 -----  
gi|302688103|ref|XP\_003033731.1|/1-328 -----  
gi|297802712|ref|XP\_002869240.1|/1-290 -----  
gi|281427796|ref|NP\_001164000.1|/1-322 -----  
gi|268565413|ref|XP\_002639437.1|/1-302 -----  
gi|260784959|ref|XP\_002587531.1|/1-282 -----  
gi|226499040|ref|NP\_001148791.1|/1-296 -----  
gi|224088986|ref|XP\_002308590.1|/1-293 -----  
gi|215983064|ref|NP\_001135979.1|/1-405 -----  
gi|213404608|ref|XP\_002173076.1|/1-346 -----  
gi|198430178|ref|XP\_002119314.1|/1-305 -----  
gi|196012778|ref|XP\_002116251.1|/1-270 -----  
gi|168044897|ref|XP\_001774916.1|/1-297 -----  
gi|159468203|ref|XP\_001692272.1|/1-292 -----  
gi|158297402|ref|XP\_317640.3|/1-307 -----  
gi|156368106|ref|XP\_001627537.1|/1-314 -----  
gi|149734120|ref|XP\_001489320.1|/1-404 -----  
gi|149724949|ref|XP\_001504864.1|/1-344 -----  
gi|148225464|ref|NP\_001085657.1|/1-368 -----  
gi|146172296|ref|XP\_001018388.2|/1-360 -----  
gi|144226857|ref|NP\_001016859.2|/1-360 -----  
gi|125524746|gb|EAY72860.1|/1-292 -----  
gi|115749607|ref|NP\_898907.2|/1-344 -----  
gi|115455545|ref|NP\_001051373.1|/1-309 -----  
gi|115435032|ref|NP\_001042274.1|/1-292 -----  
gi|84000031|ref|NP\_001033117.1|/1-402 -----  
gi|83776600|ref|NP\_004208.2|/1-344 -----  
gi|76253851|ref|NP\_695208.2|/1-397 -----  
gi|68013217|ref|NP\_001018849.1|/1-355 -----  
gi|66815573|ref|XP\_641803.1|/1-384 -----  
gi|62865639|ref|NP\_001015878.1|/1-309 -----  
gi|62857967|ref|NP\_001016570.1|/1-415 -----  
gi|57525577|ref|NP\_001003640.1|/1-405 -----  
gi|50759065|ref|XP\_425725.1|/1-409 -----  
gi|50303387|ref|XP\_451635.1|/1-361 -----  
gi|46358064|ref|NP\_035627.1|/1-417 -----  
gi|45198420|ref|NP\_985449.1|/1-367 -----  
gi|38327570|ref|NP\_940838.1|/1-403 -----  
gi|17505246|ref|NP\_491714.1|/1-305 -----  
gi|17137514|ref|NP\_477336.1|/1-329 -----  
gi|17136516|ref|NP\_476749.1|/1-411 -----  
gi|16758580|ref|NP\_446201.1|/1-343 -----  
gi|15233958|ref|NP\_195009.1|/1-294 -----  
gi|15225495|ref|NP\_182073.1|/1-288 -----  
gi|6708213|gb|AAF25838.1|/1-282 -----  
gi|6325047|ref|NP\_015115.1|/1-367 -----  
gi|2979623|gb|AAC12683.1|/1-345 -----

```

XP_020952967.1/1-297
XP_012380002.1/1-290
XP_006102660.1/1-339
XP_005673091.1/1-402
XP_004484680.1/1-405
XP_004462482.1/1-349
Q6NW76.1/1-320
NP_999084.2/1-344
gi|1190438012|ref|XP_020822491.1|/1-365
gi|1190373986|ref|XP_020837071.1|/1-405
gi|1154067554|ref|NP_001153906.2|/1-332
gi|1131237831|ref|XP_019799799.1|/1-344
gi|1131178530|ref|XP_019784431.1|/1-296
gi|1126479796|ref|XP_006940862.2|/1-308
gi|1113784803|ref|XP_019353949.1|/1-376
gi|1022987698|ref|XP_016286291.1|/1-365
gi|966994491|ref|XP_014974040.1|/1-344
gi|966965902|ref|XP_015004225.1|/1-398
gi|955535802|ref|XP_004439167.2|/1-335
gi|951053762|ref|XP_014465099.1|/1-416
gi|946796851|ref|XP_014384184.1|/1-404
gi|946756071|ref|XP_014392719.1|/1-299
gi|922383691|ref|XP_013462066.1|/1-300
gi|909794683|ref|XP_013153467.1|/1-419
gi|891599507|ref|XP_013025412.1|/1-351
gi|891565640|ref|XP_013019059.1|/1-351
gi|884853217|ref|XP_013010870.1|/1-315
gi|830244266|ref|XP_012590158.1|/1-296
gi|828211890|ref|XP_012558808.1|/1-339
gi|820033943|ref|NP_001295465.1|/1-282
gi|795377289|ref|XP_011750175.1|/1-471
gi|779989227|ref|XP_011666707.1|/1-321
gi|761905244|ref|XP_011402440.1|/1-385
gi|759175630|ref|XP_011377486.1|/1-303
gi|759149200|ref|XP_011368486.1|/1-311
gi|759116391|ref|XP_011357226.1|/1-339
gi|758991346|ref|XP_957232.2|/1-420
gi|743922878|ref|XP_011005517.1|/1-293
gi|698438703|ref|XP_009757361.1|/1-296
gi|697188794|ref|XP_009603442.1|/1-294
gi|658871623|ref|XP_008418750.1|/1-330
gi|657559162|ref|XP_008283516.1|/1-424
gi|657529148|ref|XP_008293493.1|/1-319
gi|655887082|ref|XP_008247187.1|/1-292
gi|655881324|ref|XP_008272369.1|/1-402
gi|655868725|ref|XP_008268971.1|/1-343
gi|641774253|ref|XP_008170712.1|/1-431
gi|620969612|ref|XP_007654691.1|/1-303
gi|617451788|ref|XP_007568855.1|/1-331
gi|594674988|ref|XP_007185333.1|/1-402
gi|594654199|ref|XP_007175509.1|/1-282
gi|594623572|ref|XP_007166415.1|/1-344
gi|584038001|ref|XP_006753367.1|/1-368
gi|573912300|ref|XP_006643864.1|/1-292
gi|554569173|ref|XP_005878848.1|/1-339
gi|545541126|ref|XP_005635254.1|/1-405
gi|545487136|ref|XP_005616134.1|/1-307
gi|544514002|ref|XP_005590555.1|/1-471
gi|530653727|ref|XP_005313062.1|/1-365
gi|528993703|ref|XP_005219854.1|/1-303
gi|524890835|ref|XP_005101959.1|/1-332
gi|514776534|ref|XP_004968502.1|/1-292
gi|507960369|ref|XP_004686961.1|/1-405
gi|507953708|ref|XP_004684672.1|/1-344
gi|478517838|ref|XP_004433150.1|/1-344
gi|478512086|ref|XP_004430306.1|/1-405
gi|470628341|ref|XP_004321082.1|/1-402

```

|                                        |                                                              |
|----------------------------------------|--------------------------------------------------------------|
| gi 470261727 ref XP_004360485.1 /1-457 | IVPPSKMAPQMTSSSTVPSSAPKVGSSFQKPTTTTTTTTLPSEQEILTSNTSVLNAAHHQ |
| gi 449486478 ref XP_002195961.2 /1-319 | -----                                                        |
| gi 426243291 ref XP_004015492.1 /1-303 | -----                                                        |
| gi 426237569 ref XP_004012730.1 /1-344 | -----                                                        |
| gi 410979749 ref XP_003996244.1 /1-344 | -----                                                        |
| gi 410953494 ref XP_003983405.1 /1-405 | -----                                                        |
| gi 410914403 ref XP_003970677.1 /1-332 | -----                                                        |
| gi 389641901 ref XP_003718583.1 /1-397 | -----                                                        |
| gi 389635857 ref XP_003715581.1 /1-400 | -----                                                        |
| gi 357126095 ref XP_003564724.1 /1-291 | -----                                                        |
| gi 355703962 gb EHH30453.1 /1-309      | -----                                                        |
| gi 350538969 ref NP_001233545.1 /1-403 | -----                                                        |
| gi 347966592 ref XP_321274.5 /1-404    | -----                                                        |
| gi 345800233 ref XP_849906.2 /1-344    | -----                                                        |
| gi 344296517 ref XP_003419953.1 /1-405 | -----                                                        |
| gi 344290468 ref XP_003416960.1 /1-345 | -----                                                        |
| gi 344269722 ref XP_003406697.1 /1-306 | -----                                                        |
| gi 338709975 ref XP_001502047.3 /1-304 | -----                                                        |
| gi 334312551 ref XP_001378079.2 /1-402 | -----                                                        |
| gi 332848444 ref XP_511856.3 /1-344    | -----                                                        |
| gi 330793523 ref XP_003284833.1 /1-359 | -----                                                        |
| gi 321461440 gb EFX72472.1 /1-304      | -----                                                        |
| gi 308497987 ref XP_003111180.1 /1-306 | -----                                                        |
| gi 302801442 ref XP_002982477.1 /1-288 | -----                                                        |
| gi 302688103 ref XP_003033731.1 /1-328 | -----                                                        |
| gi 297802712 ref XP_002869240.1 /1-290 | -----                                                        |
| gi 281427796 ref NP_001164000.1 /1-322 | -----                                                        |
| gi 268565413 ref XP_002639437.1 /1-302 | -----                                                        |
| gi 260784959 ref XP_002587531.1 /1-282 | -----                                                        |
| gi 226499040 ref NP_001148791.1 /1-296 | -----                                                        |
| gi 224088986 ref XP_002308590.1 /1-293 | -----                                                        |
| gi 215983064 ref NP_001135979.1 /1-405 | -----                                                        |
| gi 213404608 ref XP_002173076.1 /1-346 | -----                                                        |
| gi 198430178 ref XP_002119314.1 /1-305 | -----                                                        |
| gi 196012778 ref XP_002116251.1 /1-270 | -----                                                        |
| gi 168044897 ref XP_001774916.1 /1-297 | -----                                                        |
| gi 159468203 ref XP_001692272.1 /1-292 | -----                                                        |
| gi 158297402 ref XP_317640.3 /1-307    | -----                                                        |
| gi 156368106 ref XP_001627537.1 /1-314 | -----                                                        |
| gi 149734120 ref XP_001489320.1 /1-404 | -----                                                        |
| gi 149724949 ref XP_001504864.1 /1-344 | -----                                                        |
| gi 148225464 ref NP_001085657.1 /1-368 | -----                                                        |
| gi 146172296 ref XP_001018388.2 /1-360 | -----                                                        |
| gi 144226857 ref NP_001016859.2 /1-360 | -----                                                        |
| gi 125524746 gb EAY72860.1 /1-292      | -----                                                        |
| gi 115749607 ref NP_898907.2 /1-344    | -----                                                        |
| gi 115455545 ref NP_001051373.1 /1-309 | -----                                                        |
| gi 115435032 ref NP_001042274.1 /1-292 | -----                                                        |
| gi 84000031 ref NP_001033117.1 /1-402  | -----                                                        |
| gi 83776600 ref NP_004208.2 /1-344     | -----                                                        |
| gi 76253851 ref NP_695208.2 /1-397     | -----                                                        |
| gi 68013217 ref NP_001018849.1 /1-355  | -----                                                        |
| gi 66815573 ref XP_641803.1 /1-384     | -----                                                        |
| gi 62865639 ref NP_001015878.1 /1-309  | -----                                                        |
| gi 62857967 ref NP_001016570.1 /1-415  | -----                                                        |
| gi 57525577 ref NP_001003640.1 /1-405  | -----                                                        |
| gi 50759065 ref XP_425725.1 /1-409     | -----                                                        |
| gi 50303387 ref XP_451635.1 /1-361     | -----                                                        |
| gi 46358064 ref NP_035627.1 /1-417     | -----                                                        |
| gi 45198420 ref NP_985449.1 /1-367     | -----                                                        |
| gi 38327570 ref NP_940838.1 /1-403     | -----                                                        |
| gi 17505246 ref NP_491714.1 /1-305     | -----                                                        |
| gi 17137514 ref NP_477336.1 /1-329     | -----                                                        |
| gi 17136516 ref NP_476749.1 /1-411     | -----                                                        |
| gi 16758580 ref NP_446201.1 /1-343     | -----                                                        |
| gi 15233958 ref NP_195009.1 /1-294     | -----                                                        |
| gi 15225495 ref NP_182073.1 /1-288     | -----                                                        |
| gi 16708213 gb IAAF25838.1 /1-282      | -----                                                        |
| gi 16325047 ref NP_015115.1 /1-367     | -----                                                        |
| gi 2979623 gb AAC12683.1 /1-345        | -----                                                        |

-----MATKAMQLEEC  
-----MRKSLRSARRTA

-----MSSFTNKENVSN--TSFSNQNKQPQRLVQQ-----NNNVTN-----

-----MSESKLVDS

-----MSD SKLADS  
-----MSYPNNKENSNNIGGGSFVPSKQPQRLVQQ-----NTNINNHQ---

-----MAVEGEP

|                                        |                                                              |
|----------------------------------------|--------------------------------------------------------------|
| XP_020952967.1/1-297                   | -----MKSGSV-----                                             |
| XP_012380002.1/1-290                   | -----                                                        |
| XP_006102660.1/1-339                   | -----MTQKENAYPWYGRQT-----                                    |
| XP_005673091.1/1-402                   | -----MDKC-KENCISGL---KTTVPPGDGPKRVPVTQHFPQH-----             |
| XP_004484680.1/1-405                   | -----MDKC-KENYISGPV---KTTVLSGDGPKRVLMTPLQPSQN-----           |
| XP_004462482.1/1-349                   | -----MAQKENAHPWYGRQM-----                                    |
| Q6NW76.1/1-320                         | -----MQNKENREP---RVQQ-----                                   |
| NP_999084.2/1-344                      | -----MAQKENTYPWYGRQT-----                                    |
| gi 1190438012 ref XP_020822491.1/1-365 | -----MAAKNSLHPLFLCKMSEKENAHLGSYSTSL-----                     |
| gi 1190373986 ref XP_020837071.1/1-405 | -----MDKS-KENSISGPV---KTTMPLGEGPKRVPVTQQISSQN-----           |
| gi 1154067554 ref NP_001153906.2/1-332 | -----MQNKENHEPKGPHRPF-----                                   |
| gi 1131237831 ref XP_019799799.1/1-344 | -----MAQKENAYPWYGRQT-----                                    |
| gi 1131178530 ref XP_019784431.1/1-296 | -----MKSGSA-----                                             |
| gi 1126479796 ref XP_006940862.2/1-308 | -----MQSGSVQPAEEEEQTR-----                                   |
| gi 1113784803 ref XP_019353949.1/1-376 | -----MKRREPQARARTRRPSQPMGARGGADLKREAAAAVGRGTRRMAHKENV-----   |
| gi 1022987698 ref XP_016286291.1/1-365 | -----MEAKNSLHPPFLYKMKSEKENVHLGSYSTSL-----                    |
| gi 1966994491 ref XP_014974040.1/1-344 | -----MAQKENAYPWYGRQT-----                                    |
| gi 1966965902 ref XP_015004225.1/1-398 | -----MDRS-KENCISGPV---KPAAPVG-GPKRVLVTQQFPCQN-----           |
| gi 195535802 ref XP_004439167.2/1-335  | -----MLPPTSFQDHPDGIQFHGAQEGVVSPPSLMSLPRAVMKLGDV-----         |
| gi 1951053762 ref XP_014465099.1/1-416 | -----MDRTRKENRPLPTHGVKIPAHVGDGPKRVPVS-QLP-QS-----            |
| gi 1946796851 ref XP_014384184.1/1-404 | -----MDKS-KENGISGLV---KTTIPSGDGPKRVLVTQQFPSQY-----           |
| gi 1946756071 ref XP_014392719.1/1-299 | -----MNPGFLLS-----                                           |
| gi 1922383691 ref XP_013462066.1/1-300 | -----MAIATETQPPH-----                                        |
| gi 1909794683 ref XP_013153467.1/1-419 | -----MDKSMKENHSGYPSRAAKISNPIDGPKRVPVSQHSV-QS-----            |
| gi 1891599507 ref XP_013025412.1/1-351 | VNQLSIS-----SGSTLPSSANPGRQQLLKLAVSNQRQVN-----                |
| gi 1891565640 ref XP_013019059.1/1-351 | VNQLSMS-----SGSALPNSANPGRQQLLKLAVSNQRQVN-----                |
| gi 1884853217 ref XP_013010870.1/1-315 | -----MDRSSPSPTSASASSVSSSSSSSLC-----                          |
| gi 1830244266 ref XP_012590158.1/1-296 | -----MKSGDA-----                                             |
| gi 1828211890 ref XP_012558808.1/1-339 | -----                                                        |
| gi 1820033943 ref NP_001295465.1/1-282 | -----                                                        |
| gi 1795377289 ref XP_011750175.1/1-471 | AGRAGLEAHQPEDPQPLSGRCEREQPSRGLRKASAPSPLLPMSSPKAAVQLGRA-----  |
| gi 1779989227 ref XP_011666707.1/1-321 | -----MHVHLSLQV-----                                          |
| gi 1761905244 ref XP_011402440.1/1-385 | -----MAGVSTNIRLTQTQVGMTLGSASNKENATS-----                     |
| gi 1759175630 ref XP_011377486.1/1-303 | -----MSHSQAMVKSDSA-----                                      |
| gi 1759149200 ref XP_011368486.1/1-311 | -----KDSYSKT-----                                            |
| gi 1759116391 ref XP_011357226.1/1-339 | -----MTQKENAYPWYCRQT-----                                    |
| gi 1758991346 ref XP_957232.2/1-420    | FGRMSIHDENNDPSDGLRQKARELKSAGPSQVQHTSAPGRPNLFKVALQSQSGNTVR    |
| gi 1743922878 ref XP_011005517.1/1-293 | -----MAIAAEAQPO-----                                         |
| gi 1698438703 ref XP_009757361.1/1-296 | -----MGIAATENQPO-----                                        |
| gi 1697188794 ref XP_009603442.1/1-294 | -----MAIAAETQPO-----                                         |
| gi 1658871623 ref XP_008418750.1/1-330 | -----MQNKENYEPKG-LQRQ-----                                   |
| gi 1657559162 ref XP_008283516.1/1-424 | -----MDS---VKIPKDTKPQRPE-VKSHGNGPKRIPVSQQLIQKSVVTPT          |
| gi 1657529148 ref XP_008293493.1/1-319 | -----MQ-----FA-----                                          |
| gi 1655887082 ref XP_008247187.1/1-292 | -----M-----                                                  |
| gi 1655881324 ref XP_008272369.1/1-402 | -----MERS-KENCISGPI---KAAALLGDGPKRVPVTQRFPSQN-----           |
| gi 1655868725 ref XP_008268971.1/1-343 | -----MAQKENAYPWYSRPT-----                                    |
| gi 1641774253 ref XP_008170712.1/1-431 | LHEISLQLNLVYLGNMENKNGKENHNLPGHRVKTLPITIGDGPKRPLVHQHP-QN----- |
| gi 1620969612 ref XP_007654691.1/1-303 | -----                                                        |
| gi 1617451788 ref XP_007568855.1/1-331 | -----MQNKENYEPKG-LQRQF-----                                  |
| gi 1594674988 ref XP_007185333.1/1-402 | -----MDKC-KENSISGP---KTTVPLGDGPKRVPVTQQFPSQN-----            |
| gi 1594654199 ref XP_007175509.1/1-282 | -----                                                        |
| gi 1594623572 ref XP_007166415.1/1-344 | -----MAQKENAYPWYGRQT-----                                    |
| gi 1584038001 ref XP_006753367.1/1-368 | VAETGQDLQTRSGARAVLEFSNCTSSRLFSSQHVPPPPKAPPLPVSALEPSHWPS----- |
| gi 1573912300 ref XP_006643864.1/1-292 | -----MAIATESCCHE-----                                        |
| gi 1554569173 ref XP_005878848.1/1-339 | -----MTQKENAYPWYGRQT-----                                    |
| gi 1545541126 ref XP_005635254.1/1-405 | -----MDKS-KENCIAGPV---KTAIALGDGPKRVLVTQQVPSQN-----           |
| gi 1545487136 ref XP_005616134.1/1-307 | -----MLSGSAQPAESEGE-KTQ-----                                 |
| gi 1544514002 ref XP_005590555.1/1-471 | AGRAGLEAHQPEDPQPLSGRCEREQPSRGLRKASAPSPLLPMSSPKAAVQLGRA-----  |
| gi 1530653727 ref XP_005313062.1/1-365 | -----MAYKEN---VTPGTGTSKAYG-----VLSGPGPQVRPRKDPY-----         |
| gi 1528993703 ref XP_005219854.1/1-303 | -----MSHRGTARKAGGM-----                                      |
| gi 1524890835 ref XP_005101959.1/1-332 | -----MDPASRVLPKN-----                                        |
| gi 1514776534 ref XP_004968502.1/1-292 | -----MAIATESRGSE-----                                        |
| gi 1507960369 ref XP_004686961.1/1-405 | -----MDKS-KENCISGPV---KTMVPLRDGAKRVPVHQHAPSQS-----           |
| gi 1507953708 ref XP_004684672.1/1-344 | -----MAQKENAYPWYGRQT-----                                    |
| gi 1478517838 ref XP_004433150.1/1-344 | -----MAQKENAYPWYGRQT-----                                    |
| gi 1478512086 ref XP_004430306.1/1-405 | -----MDRS-KENCVAGPV---KTTIPLGDGPKRVLVTQQFPSQH-----           |
| gi 1470628341 ref XP_004321082.1/1-402 | -----MDKC-KENSISGP---KTTVPLGDGPKRVPVTQQFPSQN-----            |

gi|470261727|ref|XP\_004360485.1|/1-457 QHQPSNMKQVPPTSFKQQQVPQMLSKSQMAPITNQHQPTTTTTAAPTATISSAL ----  
gi|449486478|ref|XP\_002195961.2|/1-319 -----MKENHAACP-----  
gi|426243291|ref|XP\_004015492.1|/1-303 -----MSHRGTARKAGGM-----  
gi|426237569|ref|XP\_004012730.1|/1-344 -----MAQKENAYPWYGRQT-----  
gi|410979749|ref|XP\_003996244.1|/1-344 -----MAQKENAYPWYGRQT-----  
gi|410953494|ref|XP\_003983405.1|/1-405 -----MDKS-KENCVAGPV---KTTIPLGDGPKRVPVTQQFP SQN-----  
gi|410914403|ref|XP\_003970677.1|/1-332 -----MQNKENYDPKSHTRTFP-----  
gi|389641901|ref|XP\_003718583.1|/1-397 FEHLNVNDEND---HGDRLVQKS---KISMSTAQISHGSS---RPNLFKVALQSQSANTVT  
gi|389635857|ref|XP\_003715581.1|/1-400 INPVAVRDLLIR--CSSRPRSDS--RKLPRDAAVGDGNDPRGNTQKEPARRTS--SPR  
gi|357126095|ref|XP\_003564724.1|/1-291 -----MAISTDSR-SE-----  
gi|355703962|gb|EHH30453.1|/1-309 -----MSSPKAAVQLGRA-----  
gi|350538969|ref|INP\_001233545.1|/1-403 -----MDRS-KENCISGPV---KATAPVG-GPKRVLVTQQFPCQN-----  
gi|347966592|ref|XP\_321274.5|/1-404 -----MACNKENRKLNGPSSVAA-STGIPSHSGTLLVKKGAGVG---GP  
gi|345800233|ref|XP\_849906.2|/1-344 -----MTQKENAYPWYGRQT-----  
gi|344296517|ref|XP\_003419953.1|/1-405 -----MDKS-KENCISGPI---KTTPLGDGPKRVPVTQQFP SQN-----  
gi|344290468|ref|XP\_003416960.1|/1-345 -----MAQKENAYPWYGRQT-----  
gi|344269722|ref|XP\_003406697.1|/1-306 -----MFTNVALSFARREWK-----  
gi|338709975|ref|XP\_001502047.3|/1-304 -----MSLPEAVMKS GSV-----  
gi|334312551|ref|XP\_001378079.2|/1-402 -----MDIS-KENS VSGPSN--KTAILLGEGPKRVPITQQISSQS-----  
gi|332848444|ref|XP\_511856.3|/1-344 -----MAQKENAYPWYGRQT-----  
gi|330793523|ref|XP\_003284833.1|/1-359 -----TTATTKSTITK-----TTSASSTPSTSTPST-----  
gi|321461440|gb|EFX72472.1|/1-304 -----METKQPLKENSTN-----  
gi|308497987|ref|XP\_003111180.1|/1-306 -----MENKPEVIHHD-----  
gi|302801442|ref|XP\_002982477.1|/1-288 -----M-----  
gi|302688103|ref|XP\_003033731.1|/1-328 -----MGWRRRTRSAGSRCTATP--  
gi|297802712|ref|XP\_002869240.1|/1-290 -----MAIPTETQHQ-----  
gi|281427796|ref|INP\_001164000.1|/1-322 -----MSQRK-----AP  
gi|268565413|ref|XP\_002639437.1|/1-302 -----MENKQILQT-----  
gi|260784959|ref|XP\_002587531.1|/1-282 -----  
gi|226499040|ref|INP\_001148791.1|/1-296 -----MAVATESRGSE-----  
gi|224088986|ref|XP\_002308590.1|/1-293 -----MAIASDTQPQ-----  
gi|215983064|ref|INP\_001135979.1|/1-405 -----MGIMDRC-KENCISGP---KTAVPLSDGPKRVPVAAQFP SQN-----  
gi|213404608|ref|XP\_002173076.1|/1-346 LNRLSVN-----NGS---TVASGRQQLRL LAVSNQM HAN--  
gi|198430178|ref|XP\_002119314.1|/1-305 -----  
gi|196012778|ref|XP\_002116251.1|/1-270 -----  
gi|168044897|ref|XP\_001774916.1|/1-297 -----MGSDADV K YVR-----  
gi|159468203|ref|XP\_001692272.1|/1-292 -----MLAQRQDAG-----  
gi|158297402|ref|XP\_317640.3|/1-307 -----CANKSTPTMDDDV FATDGDVN-----  
gi|156368106|ref|XP\_001627537.1|/1-314 -----  
gi|149734120|ref|XP\_001489320.1|/1-404 -----MDRS-KENCISGPV---KTTVPLGDGPKRVPVTQQLP-QN-----  
gi|149724949|ref|XP\_001504864.1|/1-344 -----MTQKENAYPWYGRQT-----  
gi|148225464|ref|INP\_001085657.1|/1-368 -----MSYKENLIPSSCSSSSSSSS--  
gi|146172296|ref|XP\_001018388.2|/1-360 -----MKTFDFNYNQSA LQ NQQLKNGTSSQILKNIKDQENKNSSKDQENFK  
gi|144226857|ref|INP\_001016859.2|/1-360 -----MSYKENLNPSSYTS-----  
gi|125524746|gb|EAY72860.1|/1-292 -----MAIATESRCEE-----  
gi|115749607|ref|INP\_98907.2|/1-344 -----MAQKENAYPWYGRQT-----  
gi|115455545|ref|INP\_001051373.1|/1-309 -----  
gi|115435032|ref|INP\_001042274.1|/1-292 -----MAIATESRCEE-----  
gi|84000031|ref|INP\_001033117.1|/1-402 -----MDRC-KENCISGP---KTAVPLSDGPKRVPVAAQFP SQN-----  
gi|83776600|ref|INP\_004208.2|/1-344 -----MAQKENSYPWYGRQT-----  
gi|76253851|ref|INP\_695208.2|/1-397 -----MDRC-KENCVSRPV---KSTVPFG--PKRVLVTEQIP SQH-----  
gi|68013217|ref|INP\_001018849.1|/1-355 LNCLSVS-----TPS---TTANPGRQQLRL LAVSNQRQVNNV  
gi|66815573|ref|XP\_641803.1|/1-384 -----TTSTVKSTITKPTTTGATTSTNTSTIPPTTASSSSSSSSSS--  
gi|62865639|ref|INP\_001015878.1|/1-309 -----MSSPRAVVQLGKA-----  
gi|62857967|ref|INP\_001016570.1|/1-415 -----MERAVKENLPSNV---KVFHPTMEGPKRIPVTQPPSTQV-----  
gi|57525577|ref|INP\_001003640.1|/1-405 -----MDSGARSKSSRD LKIHPENEKVSAAGPKRVPVTQS-VQKPVSNP-  
gi|50759065|ref|XP\_425725.1|/1-409 -----MDRKT KENC PGNPSRATKVANPVVDGPKRVPVPQNSA-QS-----  
gi|50303387|ref|XP\_451635.1|/1-361 -----MRPSL SRDASDTGRRHSL LQSKLLSIRLSN--  
gi|46358064|ref|INP\_035627.1|/1-417 GCCKRIGKAVWRRGDMDC-KENCVSRPV---KTTVPFG--PKRVLVTEQIP SQN-----  
gi|45198420|ref|INP\_985449.1|/1-367 -----MDADAILKKDQ--RRSSLKQRNLLSMLNQTTA  
gi|38327570|ref|INP\_940838.1|/1-403 -----MDRS-KENCISGPV---KATAPVG-GPKRVLVTQQFPCQN-----  
gi|17505246|ref|INP\_491714.1|/1-305 -----MENKPPVINLP-----  
gi|17137514|ref|INP\_477336.1|/1-329 -----MTLSRAKHANRNLPHLLAKVP-----  
gi|17136516|ref|INP\_476749.1|/1-411 -----MSHPSDHLVPKENAPHRMPEKSAAVHNMQKNLLGKKPNSENMAP  
gi|16758580|ref|INP\_446201.1|/1-343 -----MAQKENVYPWYGSKT-----  
gi|15233958|ref|INP\_195009.1|/1-294 -----MAIPTETQHQ-----  
gi|15225495|ref|INP\_182073.1|/1-288 -----  
gi|16708213|gb|IAAF25838.1|/1-282 -----  
gi|16325047|ref|INP\_015115.1|/1-367 -----MQRNSLVNIKL NANSPSKTTTRPNTSRINK---  
gi|2979623|gb|IAC12683.1|/1-345 -----MAQKENAYPWYGSKT-----

XP\_020952967.1/1-297  
XP\_012380002.1/1-290  
XP\_006102660.1/1-339  
XP\_005673091.1/1-402  
XP\_004484680.1/1-405  
XP\_004462482.1/1-349  
Q6NW76.1/1-320  
NP\_999084.2/1-344  
gi|1190438012|ref|XP\_020822491.1|/1-365  
gi|1190373986|ref|XP\_020837071.1|/1-405  
gi|1154067554|ref|NP\_001153906.2|/1-332  
gi|1131237831|ref|XP\_019799799.1|/1-344  
gi|1131178530|ref|XP\_019784431.1|/1-296  
gi|1126479796|ref|XP\_006940862.2|/1-308  
gi|1113784803|ref|XP\_019353949.1|/1-376  
gi|1022987698|ref|XP\_016286291.1|/1-365  
gi|1966994491|ref|XP\_014974040.1|/1-344  
gi|1966965902|ref|XP\_015004225.1|/1-398  
gi|1955535802|ref|XP\_004439167.2|/1-335  
gi|1951053762|ref|XP\_014465099.1|/1-416  
gi|1946796851|ref|XP\_014384184.1|/1-404  
gi|1946756071|ref|XP\_014392719.1|/1-299  
gi|1922383691|ref|XP\_013462066.1|/1-300  
gi|1909794683|ref|XP\_013153467.1|/1-419  
gi|1891599507|ref|XP\_013025412.1|/1-351  
gi|1891565640|ref|XP\_013019059.1|/1-351  
gi|1884853217|ref|XP\_013010870.1|/1-315  
gi|1830244266|ref|XP\_012590158.1|/1-296  
gi|1828211890|ref|XP\_012558808.1|/1-339  
gi|1820033943|ref|NP\_001295465.1|/1-282  
gi|1795377289|ref|XP\_011750175.1|/1-471  
gi|1779989227|ref|XP\_011666707.1|/1-321  
gi|1761905244|ref|XP\_0114402440.1|/1-385  
gi|1759175630|ref|XP\_011377486.1|/1-303  
gi|1759149200|ref|XP\_011368486.1|/1-311  
gi|1759116391|ref|XP\_011357226.1|/1-339  
gi|1758991346|ref|XP\_0957232.2|/1-420  
gi|1743922878|ref|XP\_011005517.1|/1-293  
gi|1698438703|ref|XP\_009757361.1|/1-296  
gi|1697188794|ref|XP\_009603442.1|/1-294  
gi|1658871623|ref|XP\_008418750.1|/1-330  
gi|1657559162|ref|XP\_008283516.1|/1-424  
gi|1657529148|ref|XP\_008293493.1|/1-319  
gi|1655887082|ref|XP\_008247187.1|/1-292  
gi|1655881324|ref|XP\_008272369.1|/1-402  
gi|1655868725|ref|XP\_008268971.1|/1-343  
gi|1641774253|ref|XP\_008170712.1|/1-431  
gi|1620969612|ref|XP\_007654691.1|/1-303  
gi|1617451788|ref|XP\_007568855.1|/1-331  
gi|1594674988|ref|XP\_007185333.1|/1-402  
gi|1594654199|ref|XP\_007175509.1|/1-282  
gi|1594623572|ref|XP\_007166415.1|/1-344  
gi|1584038001|ref|XP\_006753367.1|/1-368  
gi|1573912300|ref|XP\_006643864.1|/1-292  
gi|1554569173|ref|XP\_005878848.1|/1-339  
gi|1545541126|ref|XP\_005635254.1|/1-405  
gi|1545487136|ref|XP\_005616134.1|/1-307  
gi|1544514002|ref|XP\_005590555.1|/1-471  
gi|1530653727|ref|XP\_005313062.1|/1-365  
gi|1528993703|ref|XP\_005219854.1|/1-303  
gi|1524890835|ref|XP\_005101959.1|/1-332  
gi|1514776534|ref|XP\_004968502.1|/1-292  
gi|1507960369|ref|XP\_004686961.1|/1-405  
gi|1507953708|ref|XP\_004684672.1|/1-344  
gi|1478517838|ref|XP\_0054433150.1|/1-344  
gi|1478512086|ref|XP\_004430306.1|/1-405  
gi|1470628341|ref|XP\_004321082.1|/1-402  
---QPAV-----AAAGQTVS-----NIPT-----  
---MAN-----TTRCLT-----  
---AQCGLNTLPQRVLQKDP-----TTPSSLVLMRS-----  
---LPSANSQAQRVLCPSNSSQRLPSHT---QKLVS SHKPVQN---LKQKQSQATSGPR  
---PISASSGQAQRVLCSSNTSHRIPTQA---QKLVS SRKAVQI---QKQKQPQTTPVSH  
---TQSGVNTLPQRFVRKEP-----ATPSALVLMRSKAVLEPS-----  
---TPSAGVGPLRVEMNP-----DTHAVSGPGRVPVK-----  
---AQSGLNILPQFVLRKEA-----VTPSALVLMRS-----  
---YHSSLNALPLRILRKEL-----STPSSLTLMNRSRAFLEPS-----  
---RLPASSGQAQRVLCSSNT-LLVSSQA---QKNVSSHKAQT---QPPKQLQAPVHI  
---TPSMVTGPQFVLRKEP-----VTPSALVLMRS-----  
---QPA-----AVAGQTMP-----SIPT-----  
---DQGT-----AAAGLVEL-----GMPP-----  
---NPGALGS---LAKYGAP---GPQFVRKETPAEALL-----  
---PQSSLNTLPNIFRKEI-----ATPSATLTMHRSRGLLELS-----  
---APSGLSTLPQFVLRKEP-----VTPSALVLMRS-----  
---PLPANSQAQRVLCPSNSSQFVPLQA---QKLVS SHKLVQN---QKQKQLQATSVPH  
---QSAG---ETAGQTQP---SFPT-----  
---RVPGGAAQAQRVLCPSNLAQFVVPVSQAPKTAASNQKLSHNQ---RMQFPPTCVVQT  
---PLPANSQAQRVLCPSNSSQFVPSKA---QKLVS SHKPVLN---LKQKQLQATSGPC  
---IIAE-----KKFPPWSS---PSPG-----  
-----QQHHTASSEVSGSAKD-----  
---QLNSGQAQRVLCPSNFAQFVVPVS---QKPALSNQKLPNSQ---MTQFPQKQL-VQA  
-YPVTKKDSRVLEGRYSSSK-----  
-YPVTKKDSRGLNKRYS SK-----  
---PPSPLLQNCQAEHQAP-----GFPA-----  
---QAAG-----AAGGPAL-----PVAT-----  
-----MNALKDN NF-----  
-----MEP-----STST-----  
---QPAGEAVTAANQTAQFP-----STPA-----  
---ASSLNRG-----  
---SYQLGSNYRLGQKTAPNLEPKVLCHP-LQESKTHQIPVSR-----TGQTSATGQTA  
---QPT-----AAEQTLF-----GVPT-----  
---DFLLYVG-----  
---AYSGLNTLPQFVLRKEP-----TTPSSLVLMNRS-----  
TVPVATKSSTIVSSAAHKSTTYAGIRRVDDDDHDELS-----  
-----QKARTDVSGAEK-----  
-----QHKASPEASSEAD-----  
-----QHKGSSEGA VVDN-----  
---SPLSVTGPQFVLRVLPKADAESYVAGPARERVG-----  
QYQFVLRGVSNQFQRIQFVSHQFVSHVSAAKSTHTADQNANPATQNVNPAPQPKSGSQ  
---TPSMVAGPQFVLRVLPFVETIRNAVTPGREGCVS-----  
---QSGS-----SQAAGPAQ---PSVP-----  
---PVSACSGQAERVLCPSSNQFVPSQA---QKLLPAEKPVQK-----LKQAQAASVPR  
---PQSGLNTLPQFVLRKEA-----ATPSALVLLNRS-----  
---RVPGGQVQAQRIPLCPNLAQFVVPVQSAQKALSNOQKPSQNF---LMQFPPTSLVQF  
-----TPVSVTGPQFVLRVLPKADAESYVAGPREGCVS-----  
---PVSANSQAQRVLCPSNSSQRLPSQV---QKLVS SQKPVQP---LKQKPAQAASAPR  
-----MMP-----SIPT-----  
---AQSGLNTLPQFVLRKEP-----VTPSALVLMRS-----  
---VLAA-----DEAP-PLP---SAPP-----  
-----EKAPPHSQEE-----  
---AQCGLNTLPQFVLRQKDP-----TTPSSLVLMRS-----  
---PLSANSQAQRVLCPSNSSQFVPPQT---QKLVS SHKPAQN---LKQKQLQATGVPR  
---EQSK-----DAAGHVEL---SVPP-----  
---QPAGEAVTAANQTAQFP-----SSPA-----  
---MPSGTPSESLLAQRAMA-----STNKIILKSS-----  
---QHAA-----AAGQTVF-----GAPT-----  
---LTSGTTAAHVDSLAAAKLPLRVPAEK-----  
-----DKASAHANEE-----  
---ALPASSGQAQRVLCPSNS-QRLPSQA---QKLVS SHKAVPNPN---LKQKQLQANNAPR  
---AQSGLNTLPQFVLRKDP-----TTPSALVLMNRS-----  
---AQSGLNTLPQFVLRKEP-----VTPSALVLMRS-----  
---PLSANSQAQRVLCPSNSSHRAPTQA---QKLVS SHRPVQN---LKQKQSQATSVPP  
---PVSANSQAQRVLCPSNSSQFVPSQV---QKLVS SQKSVQP---LKQKPTQAASAPR

gi|470261727|ref|XP\_004360485.1|/1-457 -----SSSASVSTQQQSTRQMMQKQLLQEQQQQYQED-----  
gi|449486478|ref|XP\_002195961.2|/1-319 -----RPRR-----  
gi|426243291|ref|XP\_004015492.1|/1-303 ---QPAA-----AAGQSV-----GAPA-----  
gi|426237569|ref|XP\_004012730.1|/1-344 ---AQPLNTLPQVLRKEA-----VIPSALVMSRS-----  
gi|410979749|ref|XP\_003996244.1|/1-344 ---TQPLNTLPQVLRKEP-----ATPSALVMSRS-----  
gi|410953494|ref|XP\_003983405.1|/1-405 ---LLSANSQAQVRLCPSNSSQRIPSQT---QKLVSSHKPVQN---LKQKQLQATSVPR  
gi|410914403|ref|XP\_003970677.1|/1-332 ----APMTLGGPQVQVKPRAEMDRSAITGPGRECVP-----  
gi|389641901|ref|XP\_003718583.1|/1-397 SVTLPSQAAQRKMAPPPKSREPPSPSKHKKD-----  
gi|389635857|ref|XP\_003715581.1|/1-400 QASLESQIREFLHAKKPREQG-AGKEPLEQ-----  
gi|357126095|ref|XP\_003564724.1|/1-291 -----EKAQHQSQEE-----  
gi|355703962|gb|EHH30453.1|/1-309 ---QPAGEAVTAANQTAQQP-----SSPA-----  
gi|350538969|ref|INP\_001233545.1|/1-403 ---PLPVNSGQAQVRLCPSNSSQVPLQA---QKLVSSHKPVQN---QKQKQLQATSVPH  
gi|347966592|ref|XP\_321274.5|/1-404 AANTAAGRSNNAAKMVGKVAEGGQHMGG--FKAPQLPAPVVRPAASSSKPVPEKQIT-P  
gi|345800233|ref|XP\_849906.2|/1-344 ---TQPLNTLPQVLRKDP-----ATPSALVMSRS-----  
gi|344296517|ref|XP\_003419953.1|/1-405 ---PLSASGQAQVRLCPSNSSQSIPSA---QKLVSSRKPVQS---QKQKPLQITTVPR  
gi|344290468|ref|XP\_003416960.1|/1-345 ---AQSGLNTLPQVFRKDL-----ATPSALVMSRS-----  
gi|344269722|ref|XP\_003406697.1|/1-306 ---ELAP-----TERALYD-----VLLE-----  
gi|338709975|ref|XP\_001502047.3|/1-304 ---RPAV-----PTAGQSQP-----GFPN-----  
gi|334312551|ref|XP\_001378079.2|/1-402 ---RLPGSSGQAQVRLCSSNP--LLVSSQA---QKNISSHKTSHA---HQSQKLQAPVIH  
gi|332848444|ref|XP\_511856.3|/1-344 ---APSGLSTLPQVLRKEP-----VTPSALVMSRC-----  
gi|330793523|ref|XP\_003284833.1|/1-359 -----STPTSTSTSSNSG-----P-----  
gi|321461440|gb|EFX72472.1|/1-304 -----QPTVKLEN-----  
gi|308497987|ref|XP\_003111180.1|/1-306 -----EKSKNNPMK-----  
gi|302801442|ref|XP\_002982477.1|/1-288 -----VEAPEAVPE-----  
gi|302688103|ref|XP\_003033731.1|/1-328 ---RSSSPSTRAWQSCACTCCA-----  
gi|297802712|ref|XP\_002869240.1|/1-290 -----EKEASDA-----A-----  
gi|281427796|ref|INP\_001164000.1|/1-322 VCQNKENN-----VPRAAAKKGPPAQKG-----  
gi|268565413|ref|XP\_002639437.1|/1-302 -----KSKNTPNK-----  
gi|260784959|ref|XP\_002587531.1|/1-282 -----  
gi|226499040|ref|INP\_001148791.1|/1-296 -----DRASAHANQE-----  
gi|224088986|ref|XP\_002308590.1|/1-293 -----EKASTEVSGECK-----  
gi|215983064|ref|INP\_001135979.1|/1-405 ---PVSVNSGQAQVRLCPTNSSQVPSQA---QKLVSIQKPVQT---LKQKPPQAASAPR  
gi|213404608|ref|XP\_002173076.1|/1-346 ----NNSSTSADALRERQER-----  
gi|198430178|ref|XP\_002119314.1|/1-305 -----  
gi|196012778|ref|XP\_002116251.1|/1-270 -----  
gi|168044897|ref|XP\_001774916.1|/1-297 -----QESQGAGGDSIA-----  
gi|159468203|ref|XP\_001692272.1|/1-292 -----QAAGTSGGPK-----  
gi|158297402|ref|XP\_317640.3|/1-307 ---AHSEVLQ---TKMMQHPAYEN-----  
gi|156368106|ref|XP\_001627537.1|/1-314 -----  
gi|149734120|ref|XP\_001489320.1|/1-404 ---LLSANSQAQVRLCPSNSSHRVPSQA---QKLVSSHKPVQN---LKQKQSQATSVPH  
gi|149724949|ref|XP\_001504864.1|/1-344 ---AQSGLNTLPQVLRKEP-----ATPSALVMSRS-----  
gi|148225464|ref|INP\_001085657.1|/1-368 ---KFATPSSATAAQVRLRKQPYYSIFTTPSDNLLAQRAQLAPRV  
gi|146172296|ref|XP\_001018388.2|/1-360 NSQLLSVKSIKKIEQIEQQSDRVQILKVP  
gi|144226857|ref|INP\_001016859.2|/1-360 ---KFATPSSATAAQVRLRKQPYYSIFTTPSDNLLAQRAQLA-RIT-----  
gi|125524746|gb|EAY72860.1|/1-292 -----EKASPHSQEV-----  
gi|115749607|ref|INP\_898907.2|/1-344 ---AQPLNTLPQVLRKEP-----VTPSALVMSRS-----  
gi|115455545|ref|INP\_001051373.1|/1-309 -----MEKP-----  
gi|115435032|ref|INP\_001042274.1|/1-292 -----EKASPHSQEV-----  
gi|84000031|ref|INP\_001033117.1|/1-402 ---PVSVNSGQAQVRLCPTNSSQVPSQA---QKLVSIQKPVQT---LKQKPPQAASAPR  
gi|83776600|ref|INP\_004208.2|/1-344 ---APSGLSTLPQVLRKEP-----VTPSALVMSRS-----  
gi|76253851|ref|INP\_695208.2|/1-397 ---PGSASSGQAQVRLCPSNS-QRVPPQA---QKPVAGQKPVLK-----QLPAASGPR  
gi|68013217|ref|INP\_001018849.1|/1-355 SLANGKENKRTSNKFNSSLR-----  
gi|66815573|ref|XP\_641803.1|/1-384 -----SSSSSSSSSSSSSQS-----VP-----  
gi|62865639|ref|INP\_001015878.1|/1-309 ---QPAGEELATANQTAQQP-----SSPA-----  
gi|62857967|ref|INP\_001016570.1|/1-415 ---RPPGTAVSAQRILGPSNVQVQVVSQAQ-KPVMSAQKPMSTQKPMQTQGPLRPVTHGH  
gi|57525577|ref|INP\_001003640.1|/1-405 -HTRVLGAAQGPQVQRPVG-----KTSCLPGDQNTREPEH--KPAAHSKP---  
gi|50759065|ref|XP\_425725.1|/1-409 ---RPLNSGVQVQVRLCPSNFAQVQVPSQA---QKSSLSNQKLSNNQ--TTQQPRPKLPVQP  
gi|50303387|ref|XP\_451635.1|/1-361 ---AGKRPSLSRGHAHEKDSI-TSSHHRLSTGPNVNN-----  
gi|46358064|ref|INP\_035627.1|/1-417 ---LGSASSGQAQVRLCPSNS-QRVPSQA---QKLGAQKQKPAK-----QLPAASVPR  
gi|45198420|ref|INP\_985449.1|/1-367 TNGAPPQARVQPGKGYRNPQK-VLSPIRNQEMSPGKR-----  
gi|38327570|ref|INP\_940838.1|/1-403 ---PLPVNSGQAQVRLCPSNSSQRIPLQA---QKLVSSHKPVQN---QKQKQLQATSVPH  
gi|17505246|ref|INP\_491714.1|/1-305 -----EKETVNTPOK-----  
gi|17137514|ref|INP\_477336.1|/1-329 -EEHQEPIKNMCLKMMSHDAYGQ-----  
gi|17136516|ref|INP\_476749.1|/1-411 ASKPLPGSSGALTRKPLGGSNSIASSEGNFQKPMVPS-VKKTTFEAPAPVAPIKKP  
gi|16758580|ref|INP\_446201.1|/1-343 ---SQSGLNTLPQVLRKEP-----AVTPAQUALMNRS-----  
gi|15233958|ref|INP\_195009.1|/1-294 -----EKEASDAS-AAAA-----  
gi|15225495|ref|INP\_182073.1|/1-288 -----MSKKSTESDAGNT-----  
gi|16708213|gb|IAAF25838.1|/1-282 -----MEP-----STST-----  
gi|16325047|ref|INP\_015115.1|/1-367 ----PWIRISHSPQQRNPNKIPSPVREKLNRLPVNNK-----  
gi|2979623|gb|IAC12683.1|/1-345 ---SQSGLNTLSQVLRKEP-----ATTSLALVNRS-----



XP\_020952967.1/1-297 -----GRRLTIDDFEIGR  
XP\_012380002.1/1-290 -----IDDFEIGR  
XP\_006102660.1/1-339 -----NAQPTAAPGQ-----NSNGTPNL-----MRSFTIDDFEIGR  
XP\_005673091.1/1-402 PVSRLP-SNTQQSEQPQPAAGNNPEKEAASKQK-----NEESKKRQWALEDFEIGR  
XP\_004484680.1/1-405 PVSKPL-NNTQKSEQSQPPASGSNSGKELESQK-----KEESKKRQWALEDFEIGR  
XP\_004462482.1/1-349 -----NAQPTA--GQK-TVENSSGTPSFL-----MRSFTIEDFEIGR  
Q6NW76.1/1-320 -----SNS-----KVLSIDDFEIGR  
NP\_999084.2/1-344 -----NTQPTAAPGQK-VVENSSGTPNFS-----TRSFIDDFEIGR  
gi|1190438012|ref|XP\_020822491.1|/1-365 -----STQPAAVPGRI-GVDSSNMKLNLP-----VHQLKIDDFEIGR  
gi|1190373986|ref|XP\_020837071.1|/1-405 PASRPP-KSTLNTSEQSQTTPVSASTPGKGETPRQK-----NEETKKRQWALDDFEIGR  
gi|1154067554|ref|NP\_001153906.2|/1-332 -----TSSVSP-----PKKISIDDFEIGR  
gi|1131237831|ref|XP\_019799799.1|/1-344 -----NAQPTAAPLQK-VVENNSRTPNFS-----MRSFTIDDFEIGR  
gi|1131178530|ref|XP\_019784431.1|/1-296 -----VRRLTIDDFEIGR  
gi|1126479796|ref|XP\_006940862.2|/1-308 -----VRRLTIEDFEIGR  
gi|1113784803|ref|XP\_019353949.1|/1-376 -----AQRATAVPGRVPEA--GAQVAPQPP-----LKTLSIDDFEIGR  
gi|1022987698|ref|XP\_016286291.1|/1-365 -----GAQPAALPGRI-GLDNSNVKSNQT-----VRHLKIDDFEIGR  
gi|1966994491|ref|XP\_014974040.1|/1-344 -----NVQPTAAPGQK-VVENSSGTPNIL-----MRHFTIDDFEIGR  
gi|1966965902|ref|XP\_015004225.1|/1-398 PVSRLP-SHTPKSKQPLPSAPENNPPEELASKQK-----NEESKKRQWALEDFEIGR  
gi|195535802|ref|XP\_004439167.2|/1-335 -----VRHFTIDDFEIGR  
gi|1951053762|ref|XP\_014465099.1|/1-416 SSRPQA-PN-NNEKPHHPVPSANQPEKEGTSKPK-----NQETKKRQWSLDDFEIGR  
gi|1946796851|ref|XP\_014384184.1|/1-404 PVSRLP-NNTQKSEQQPPAPGKNSKEVASKQK-----NEESKK-QWTLEDFEIGR  
gi|1946756071|ref|XP\_014392719.1|/1-299 -----SRSLTIDDFEIRC  
gi|1922383691|ref|XP\_013462066.1|/1-300 -----QRRWILNDFDIGK  
gi|1909794683|ref|XP\_013153467.1|/1-419 TARSQL-PTKNNEKPPQVVPVPAKNPEAESTSKQKNEETAKKKNEETKKRQWSLDDFEIGR  
gi|1891599507|ref|XP\_013025412.1|/1-351 -----QKDEPIAGVPSPMGPQ-----WRDFHIGMFEIGK  
gi|1891565640|ref|XP\_013019059.1|/1-351 -----QQDEPIAGVPSPMGPQ-----WRDFHIGMFEIGK  
gi|1884853217|ref|XP\_013010870.1|/1-315 -----RRPFTIEDFDIGK  
gi|1830244266|ref|XP\_012590158.1|/1-296 -----VRRLTIDDFEIGR  
gi|1828211890|ref|XP\_012558808.1|/1-339 QNSSKGTVKTMLQKSDKPSLEKENQDQKEPKNQK----KENPPPPIDKCWSLSDFDIGK  
gi|1820033943|ref|NP\_001295465.1|/1-282 -----KKHFTINDFEIGR  
gi|1795377289|ref|XP\_011750175.1|/1-471 -----MRLKIDDFEIGR  
gi|1779989227|ref|XP\_011666707.1|/1-321 -----TTAQARTQPVKSAENGHGHDDK-----QMEPKKSWTLKDFDIGR  
gi|1761905244|ref|XP\_0114402440.1|/1-385 HGTREHLTVPPSAPPPVSSSLGEAPQGGAGTADQ-----SQQPVSCKWGLSDFDIGR  
gi|1759175630|ref|XP\_011377486.1|/1-303 -----TRQLTIDDFEIGR  
gi|1759149200|ref|XP\_011368486.1|/1-311 -----NNSEKELASKQK-----NEESKKRQWALEDFEIGR  
gi|1759116391|ref|XP\_011357226.1|/1-339 -----NAQTAAAPGQ-----NSSGTPNL-----MRSFTIDDFEIGR  
gi|1758991346|ref|XP\_957232.2|/1-420 -----QPMASASVSSTGTSTSESSSSAGYEQSI-----SPKQFHLGMFEIGR  
gi|1743922878|ref|XP\_011005517.1|/1-293 -----KRWTLNDFDIGK  
gi|1698438703|ref|XP\_009757361.1|/1-296 -----KKRWMLNDFDIGK  
gi|1697188794|ref|XP\_009603442.1|/1-294 -----KRWTVNDFDIGK  
gi|1658871623|ref|XP\_008418750.1|/1-330 -----SSSNPP-----PKKFTIDDFEIGR  
gi|1657559162|ref|XP\_008283516.1|/1-424 QNQPKTHVPTVKPELTTPASESAKLEKPNKPAKN----DAANASSSKKPWSLENFDIGR  
gi|1657529148|ref|XP\_008293493.1|/1-319 -----AASSSV-----SKKISIDDFEIGR  
gi|1655887082|ref|XP\_008247187.1|/1-292 -----LRLLTIEDFEIGR  
gi|1655881324|ref|XP\_008272369.1|/1-402 PVSPPP-NNTPKSEQPPPSAPGNNPEKELTSNQK-----NEESKKRQWTLDFDIGR  
gi|1655868725|ref|XP\_008268971.1|/1-343 -----NAPPTAVLGQK-GMENSSGAPNF-----TRPFTIDDFEIGR  
gi|1641774253|ref|XP\_008170712.1|/1-431 ISRPPA-PSKNNEEPPQTSLSAKNLEAEGTSVQK-----NEETKKRQWCLDDFEIGR  
gi|1620969612|ref|XP\_007654691.1|/1-303 -----NIPEKREVPSQKEAPCQK-----NEESKKRQWSLDDFDIGR  
gi|1617451788|ref|XP\_007568855.1|/1-331 -----SSSNSP-----PKKFTIDDFEIGR  
gi|1594674988|ref|XP\_007185333.1|/1-402 AVSRPL-SNTQKSEQQLPAPGNNPEKEAASKQK-----NEESKKRQWALEDFEIGR  
gi|1594654199|ref|XP\_007175509.1|/1-282 -----MRLTIDDFEIGR  
gi|1594623572|ref|XP\_007166415.1|/1-344 -----NAQPTAAPLQK-VVENNSGTPNFS-----MRSFTIDDFEIGR  
gi|1584038001|ref|XP\_006753367.1|/1-368 -----VRSLTIDDFEIGR  
gi|1573912300|ref|XP\_006643864.1|/1-292 -----KRWVLSDFDIGK  
gi|1554569173|ref|XP\_005878848.1|/1-339 -----NAQPTAAPGQ-----NSNGTPNL-----MRSFTIDDFEIGR  
gi|1545541126|ref|XP\_005635254.1|/1-405 PASRSL-NNTQKSEQSPSSAPGNNSEKELATKQK-----NEESKKRQWALEDFEIGR  
gi|1545487136|ref|XP\_005616134.1|/1-307 -----GRRLTIDDFEIGR  
gi|1544514002|ref|XP\_005590555.1|/1-471 -----MRLKIDDFEIGR  
gi|1530653727|ref|XP\_005313062.1|/1-365 -----SIQKPAVPGRVPAELSSGAQAQPTP-----QRIFTINDFEIGR  
gi|1528993703|ref|XP\_005219854.1|/1-303 -----ARRFTVDDFEIGR  
gi|1524890835|ref|XP\_005101959.1|/1-332 -----ENNSSGGDIASSSD-----SSNGPVKWGLSNFDIGR  
gi|1514776534|ref|XP\_004968502.1|/1-292 -----KRWVLSDFEVLGK  
gi|1507960369|ref|XP\_004686961.1|/1-405 AAPRPL-AGTPKSEPP-PSAPGNNSEKEQASKQK-----TEESKKRQWALEDFEIGR  
gi|1507953708|ref|XP\_004684672.1|/1-344 -----NTQPTAAPGQK-VVENSSGTPNLS-----MRSFTIDDFEIGR  
gi|1478517838|ref|XP\_004433150.1|/1-344 -----NAQPTAALGQK-VVENSSGTPNLL-----MRSFTIDDFEIGR  
gi|1478512086|ref|XP\_004430306.1|/1-405 PVSRLP-NSTQKSEQQPSAPGNNSEKERTSKEK-----NEDSKRRQWALEDFEIGR  
gi|1470628341|ref|XP\_004321082.1|/1-402 SVSRPL-SNTQKSEQQLPAPGNNPEKEAASKQK-----NEESKKRQWALEDFEIGR

gi|470261727|ref|XP\_004360485.1|/1-457 -----KKKWTIDDFDIGK  
gi|449486478|ref|XP\_002195961.2|/1-319 -----QAQNPAAESTSKQKTEET-KKKSEETKKRQWSLDDFEIGR  
gi|426243291|ref|XP\_004015492.1|/1-303 -----ARRFTIDDFEIGR  
gi|426237569|ref|XP\_004012730.1|/1-344 -----NAQPTAAPGQK-VVENSSGTLNIP-----KRSFTIDDFEIGR  
gi|410979749|ref|XP\_003996244.1|/1-344 -----NTQPTAAPGQK-VVENSSGTPNFS-----MRSFTIDDFEIGR  
gi|410953494|ref|XP\_003983405.1|/1-405 SVSRPL-NNTQKSEQPLPSATGNNSEKELTTKQK-----NEESKKRQWALDDFEIGR  
gi|410914403|ref|XP\_003970677.1|/1-332 -----SSSTSS-----TRKITIDDFDIGR  
gi|389641901|ref|XP\_003718583.1|/1-397 -----SVSSSVDELANEVEEASAPR-----VPKEFHLGMFEIGR  
gi|389635857|ref|XP\_003715581.1|/1-400 -----LQAAQAAAAAALVAQPSAQ-----PVAMHLGMFEIGK  
gi|357126095|ref|XP\_003564724.1|/1-291 -----KRWVLSDFEVBGK  
gi|355703962|gb|EHH30453.1|/1-309 -----MRRLKIDDFEIGR  
gi|350538969|ref|NP\_001233545.1|/1-403 PVSRL-NNTQKSKQPLPSAPENNPHEELASKQK-----NEESKKRQWALDDFEIGR  
gi|347966592|ref|XP\_321274.5|/1-404 KTESEPMDDTPADDRPD--AAEQKQSGTDGNQQAQ-----QAKPAKKVWTLNSNDFIGR  
gi|345800233|ref|XP\_849906.2|/1-344 -----NGQPTAAPGQK-VVENSSGIPNFS-----MRSFTIDDFEIGR  
gi|344296517|ref|XP\_003419953.1|/1-405 PVSRLP-NNTPKGEQAQPPASGNNSGKELASKQK-----KEESKKRQWALDDFEIGR  
gi|344290468|ref|XP\_003416960.1|/1-345 -----NAQPTAAPGEKMTENSSTGTPSFL-----MRPFTIDDFEIGR  
gi|344269722|ref|XP\_003406697.1|/1-306 -----MRRLRIDDFEIGR  
gi|338709975|ref|XP\_001502047.3|/1-304 -----VRHLTIDDFEIGR  
gi|334312551|ref|XP\_001378079.2|/1-402 PTSRPP-SSTQNTSEQSQPPVSASIPGKETPRQK-----NEETKKRQWALDDFEIGR  
gi|332848444|ref|XP\_511856.3|/1-344 -----NVQPTAAPGQK-VMENSSGTPNIL-----TRHFTIDDFEIGR  
gi|330793523|ref|XP\_003284833.1|/1-359 -----KKKWCIDDFDIGK  
gi|321461440|gb|EFX72472.1|/1-304 -----SEWSLDNFEIGR  
gi|308497987|ref|XP\_003111180.1|/1-306 -----GGKLSIKDFFEIGR  
gi|302801442|ref|XP\_002982477.1|/1-288 -----ERRWKLADFDIGK  
gi|302688103|ref|XP\_003033731.1|/1-328 -----PARILTTPVSRRYPT-----REWTLHDFDIGR  
gi|297802712|ref|XP\_002869240.1|/1-290 -----QKRWTLSDFDIGK  
gi|281427796|ref|NP\_001164000.1|/1-322 -ALSENK-----AQKGAASDTAQESS-----KGRR---WTLADFDIGK  
gi|268565413|ref|XP\_002639437.1|/1-302 -----GGKLSINDFEIGR  
gi|260784959|ref|XP\_002587531.1|/1-282 -----MKS---WKLEDDFEIGR  
gi|226499040|ref|NP\_001148791.1|/1-296 -----KRWVLSDFEVBGK  
gi|224088986|ref|XP\_002308590.1|/1-293 -----KRWTLNDFDIGK  
gi|215983064|ref|NP\_001135979.1|/1-405 PVARPP-SNTQKSKQPQPPAGNNPEKEVASKQK-----NEESKKRQWALDDFEIGR  
gi|213404608|ref|XP\_002173076.1|/1-346 -----HYSLSSDGNNSKSP-----LRNFHLGMFEIGK  
gi|198430178|ref|XP\_002119314.1|/1-305 -----MSSANNENKAPEKASTSGRAT-----ASSAKDNASDTWSLKNFDIGK  
gi|196012778|ref|XP\_002116251.1|/1-270 -----RKRWTLDDFDIGR  
gi|168044897|ref|XP\_001774916.1|/1-297 -----EKRWSLTDFDIGK  
gi|159468203|ref|XP\_001692272.1|/1-292 -----RRWTIDDFDIGK  
gi|158297402|ref|XP\_317640.3|/1-307 -----PYEWSTDDFEVGR  
gi|156368106|ref|XP\_001627537.1|/1-314 -MAKIPSNHTQTTVSSFNPSITKHKMGSKGGPFK-----LLENMKQKGWNLSDFDIGK  
gi|149734120|ref|XP\_001489320.1|/1-404 PVPRPL-NNTQRSEQLQPSAGNNSEKELASKEK-----NEESKKRQWALDDFEIGR  
gi|149724949|ref|XP\_001504864.1|/1-344 -----NAQPTVALGQK-VMENSSGTPNIL-----MRSFTIDDFEIGR  
gi|148225464|ref|NP\_001085657.1|/1-368 -----PAASSSVPGRVALGTDVASHNTALAEAP-----KRKFTIDDFEIGR  
gi|146172296|ref|XP\_001018388.2|/1-360 -----KIQWQLSDFELGK  
gi|144226857|ref|NP\_001016859.2|/1-360 -----PSASSVPGRVAVSMDASSQNTALAEALP-----KRKFTIDDFEIGR  
gi|125524746|gb|EAY72860.1|/1-292 -----KRWVLSDFDIGK  
gi|115749607|ref|NP\_898907.2|/1-344 -----NAQPTAAPGQK-VVENSSGTPNIP-----KRSFTIDDFEIGR  
gi|115455545|ref|NP\_001051373.1|/1-309 -----EWSMDDFEIGK  
gi|115435032|ref|NP\_001042274.1|/1-292 -----KRWVLSDFDIGK  
gi|84000031|ref|NP\_001033117.1|/1-402 PVTRPP-SNTQKSKQPQPPAGNNPEKEVASKQK-----NEESKKRQWALDDFEIGR  
gi|83776600|ref|NP\_004208.2|/1-344 -----NVQPTAAPGQK-VMENSSGTPDIL-----TRHFTIDDFEIGR  
gi|76253851|ref|NP\_695208.2|/1-397 PASR-L-SNPQKSEQPPAASGNNSEKEQTSIQK-----TEDSKKRQWTLDDFEIGR  
gi|68013217|ref|NP\_001018849.1|/1-355 -----KIEEPIAGVPSSAGPQ-----WREFHIGMFEIGK  
gi|66815573|ref|XP\_641803.1|/1-384 -----KKKWCIDDFDIGK  
gi|62865639|ref|NP\_001015878.1|/1-309 -----MRRLTVDDFEIGR  
gi|62857967|ref|NP\_001016570.1|/1-415 QAGKPQGPNNRTPQQTSHSSTPNVEKKGSTDQG--KTLAVPKEEGKKQWCLDDFEIGR  
gi|57525577|ref|NP\_001003640.1|/1-405 QPKPPLSAETNKTAEPSKQDKPHQTPSSTTSTSSN----TSGSSKSSKAWTLNFDIGR  
gi|50759065|ref|XP\_425725.1|/1-409 TAGPQV-PSKNSEKPPQAPVPAKSSSEADSVSKQKNEESTKKKKEETKKRQWSLDDFEIGR  
gi|50303387|ref|XP\_451635.1|/1-361 -----PRRSLMVKK---PNTAHTG-RVPILND-----HNDKFENMTLQDFEIGK  
gi|46358064|ref|NP\_035627.1|/1-417 PVSR-L-LNPPQKNEQ--PAASGNDSEKEQASLQK-----TEDTKKRQWTLDDFEIGR  
gi|45198420|ref|NP\_985449.1|/1-367 -----PTLEISELKNVSPINQAHKTGKARAGGV-----PTLSKLQNLKLADFEIGK  
gi|38327570|ref|NP\_940838.1|/1-403 PVSRLP-NNTQKSKQPLPSAPENNPHEELASKQK-----NEESKKRQWALDDFEIGR  
gi|17505246|ref|NP\_491714.1|/1-305 -----GGKFTINDFEIGR  
gi|17137514|ref|NP\_477336.1|/1-329 -----PYDWSPRDFEMGA  
gi|17136516|ref|NP\_476749.1|/1-411 ESLSKQKPTAASSESSKELGAASSAEKEKTET-----QPQPKKKTWELNNDFEIGR  
gi|16758580|ref|NP\_446201.1|/1-343 -----NSQSTAVPGQKL TENK--GATALQGSQS-----RQPFTIDNFEIGR  
gi|15233958|ref|NP\_195009.1|/1-294 -----QKRWTLSDFDIGK  
gi|15225495|ref|NP\_182073.1|/1-288 -----EKQWSLADFEIGR  
gi|16708213|gb|IAAF25838.1|/1-282 -----RKHFINDFEIGR  
gi|16325047|ref|NP\_015115.1|/1-367 -----KFLDMESSKIPSPIRKATSS-KMIHENK-----KLPKFKSLSDDFELGK  
gi|2979623|gb|IAC12683.1|/1-345 -----NSQSTAAPGQKLAENKSQGSTASQGSQN-----KQPFTIDNFEIGR

\*::

XP\_020952967.1/1-297  
XP\_012380002.1/1-290  
XP\_006102660.1/1-339  
XP\_005673091.1/1-402  
XP\_004484680.1/1-405  
XP\_004462482.1/1-349  
Q6NW76.1/1-320  
NP\_999084.2/1-344  
gi|1190438012|ref|XP\_020822491.1|/1-365  
gi|1190373986|ref|XP\_020837071.1|/1-405  
gi|1154067554|ref|NP\_001153906.2|/1-332  
gi|1131237831|ref|XP\_019799799.1|/1-344  
gi|1131178530|ref|XP\_019784431.1|/1-296  
gi|1126479796|ref|XP\_006940862.2|/1-308  
gi|1113784803|ref|XP\_019353949.1|/1-376  
gi|1022987698|ref|XP\_016286291.1|/1-365  
gi|1966994491|ref|XP\_014974040.1|/1-344  
gi|1966965902|ref|XP\_015004225.1|/1-398  
gi|195535802|ref|XP\_004439167.2|/1-335  
gi|1951053762|ref|XP\_014465099.1|/1-416  
gi|1946796851|ref|XP\_014384184.1|/1-404  
gi|1946756071|ref|XP\_014392719.1|/1-299  
gi|1922383691|ref|XP\_013462066.1|/1-300  
gi|1909794683|ref|XP\_013153467.1|/1-419  
gi|1891599507|ref|XP\_013025412.1|/1-351  
gi|1891565640|ref|XP\_013019059.1|/1-351  
gi|1884853217|ref|XP\_013010870.1|/1-315  
gi|1830244266|ref|XP\_012590158.1|/1-296  
gi|1828211890|ref|XP\_012558808.1|/1-339  
gi|1820033943|ref|NP\_001295465.1|/1-282  
gi|1795377289|ref|XP\_011750175.1|/1-471  
gi|1779989227|ref|XP\_011666707.1|/1-321  
gi|1761905244|ref|XP\_0114402440.1|/1-385  
gi|1759175630|ref|XP\_011377486.1|/1-303  
gi|1759149200|ref|XP\_011368486.1|/1-311  
gi|1759116391|ref|XP\_011357226.1|/1-339  
gi|1758991346|ref|XP\_0957232.2|/1-420  
gi|1743922878|ref|XP\_011005517.1|/1-293  
gi|1698438703|ref|XP\_009757361.1|/1-296  
gi|1697188794|ref|XP\_009603442.1|/1-294  
gi|1658871623|ref|XP\_008418750.1|/1-330  
gi|1657559162|ref|XP\_008283516.1|/1-424  
gi|1657529148|ref|XP\_008293493.1|/1-319  
gi|1655887082|ref|XP\_008247187.1|/1-292  
gi|1655881324|ref|XP\_008272369.1|/1-402  
gi|1655868725|ref|XP\_008268971.1|/1-343  
gi|1641774253|ref|XP\_008170712.1|/1-431  
gi|1620969612|ref|XP\_007654691.1|/1-303  
gi|1617451788|ref|XP\_007568855.1|/1-331  
gi|1594674988|ref|XP\_007185333.1|/1-402  
gi|1594654199|ref|XP\_007175509.1|/1-282  
gi|1594623572|ref|XP\_007166415.1|/1-344  
gi|1584038001|ref|XP\_006753367.1|/1-368  
gi|1573912300|ref|XP\_006643864.1|/1-292  
gi|1554569173|ref|XP\_005878848.1|/1-339  
gi|1545541126|ref|XP\_005635254.1|/1-405  
gi|1545487136|ref|XP\_005616134.1|/1-307  
gi|1544514002|ref|XP\_005590555.1|/1-471  
gi|1530653727|ref|XP\_005313062.1|/1-365  
gi|1528993703|ref|XP\_005219854.1|/1-303  
gi|1524890835|ref|XP\_005403159.1|/1-332  
gi|1514776534|ref|XP\_004968502.1|/1-292  
gi|1507960369|ref|XP\_004686961.1|/1-405  
gi|1507953708|ref|XP\_004684672.1|/1-344  
gi|1478517838|ref|XP\_0054133159.1|/1-344  
gi|1478512086|ref|XP\_004430306.1|/1-405  
gi|1470628341|ref|XP\_004321082.1|/1-402  
PLGKGKFGNVYLARLKES-HFIVALKVLFKSQIEKEG-LEHQLRREIEIQAHLQ-----  
PLGKGKFGSVYLARLKEN-HFIVALKILFKSQIEKEG-LEHQLRREIEIQAHLQEEPDHL  
PLGKGKFGNVYLAREKKS-RFIVALKVLFKSQIEKEG-VEHQLRREIEIQAHLQ-----  
PLGKGKFGNVYLAREKQS-KFILALKVLFKTQLEKAG-VEHQLRREVEIQSHLR-----  
PLGKGKFGNVYLAREKQS-KFILALKVLFKAQLEKAG-VEHQVRREVEIQSHLR-----  
PLGKGKFGNVYLAREKKS-HFIVALKVLFKSQIEKEG-VEHQLRREIEIQAHLQ-----  
PLGKGKFGNVYLAREKRL-KVVIALKVLFKSQMVKEG-VEHQLRREIEIQSHLR-----  
PLGKGKFGNVYLAREKKS-HFIVALKVLFKSQIEKEG-VEHQLRREIEIQAHLQ-----  
PLGKGKFGNVYLAREKNS-QFIVALKVLFKSQMEKEG-VEHQLRREIEIQSHLR-----  
PLGKGKFGNVYLAREKQS-KFILALKVLFKAQLEKAG-VEHQLRREVEIQSHLR-----  
PLGKGKFGNVYLARVKKL-QAIVALKVLFKSQMEKEG-VEHQLRREIEIQAHLQ-----  
PLGKGKFGNVYLAREKKS-HFIVALKVLFKSQIEKEG-VEHQLRREIEIQAHLQ-----  
PLGKGKFGNVYLARLKES-HFIVALKVLFKSQIEKEG-LEHQLRREIEIQAHLQ-----  
PLGKGKFGNVYLAREKGS-HFIVALKVLFKSQMEKEG-VEHQLRREIEIQAHLQ-----  
PLGKGKFGNVYLAREKNS-QFIVALKVLFKSQMEKEG-VEHQLRREIEIQSHLR-----  
PLGKGKFGNVYLAREKKS-HFIVALKVLFKSQIEKEG-VEHQLRREIEIQAHLQ-----  
PLGKGKFGNVYLAREKQS-KFILALKVLFKAQLEKAG-VEHQLRREVEIQSHLR-----  
PLGKGKFGNVYLARLKES-HFIVALKVLFKSQIEKEG-LEHQLRREIEIQAHLQ-----  
PLGKGKFGNVYLAREKQS-KFILALKVLFKSQLEEAG-VEHQLRREVEIQSHLR-----  
PLGKGKFGNVYLAREKQS-KFILALKVLFKAQLEKAG-VEHQIRREVEIQSHLR-----  
PLGKGKFGNVYLARLDS-HFIVALKVLFKSQLEKEG-MEHQLRREIEIQSHLR-----  
PLGRGKFGHVYLAREKTS-NHIVALKVLFKSQLQSSQ-VEHQLRREVEIQSHLR-----  
PLGKGKFGNVYLAREKQS-KFILALKVLFKTQLEEAG-VEHQLRREVEIQSHLR-----  
PLGKGKFGRVYLAKKKT-GFVVALKTLHKSLEIHSR-IEKQVRREIEIQSNLR-----  
PLGKGKFGRVYLAKKKT-GFIVALKTLHKSLEIHSR-IEKQVRREIEIQSHLR-----  
PLGKGKFGSVYLARLKQS-HFIVALKVLFKSQVEKEG-MEHQLRREVEIQAHLH-----  
PLGKGKFGNVYLARLRES-RFIVALKVLFKSQIEKEG-LEHQLRREVEIQAHLQ-----  
PLGKGKFGSVYLAREKQS-HFIVALKVLFKSQLMKA-VEHQLRREIEIQSHLK-----  
PLGRGKFGNVYLARLKEN-HFIVALKVLFKSEIGKEG-LEHQLRREVEIQSHLQ-----  
PLGKGKFGNVYLARLKES-HFIVALKVLFKSQIEKEG-LEHQLRREIEIQAHLQ-----  
PLGKGKFGSVYLAREKQT-KYIVALKVLFKSQLQKAQ-VEHQLRREIEIQSHLR-----  
PLGRGKFGNVYLAREKKT-KFVVALKVLFKSQLQKAS-VEHQLRREIEIQAHLQ-----  
PLGKGKFGNVYLARLKES-HFIVALKVLFKSQIEKEG-MEHQLRREIEIQSHLQ-----  
PLGKGKFGNVYLAREKQS-KFILALKVLFKAQLEKAG-VEHQLRREVEIQSHLR-----  
PLGKGKFGNVYLAREKKS-HFIVALKVLFKSQIEKEG-VEHQLRREIEIQAHLQ-----  
PLGKGKFGRVYLARERSS-GFICALKVLKYSLELQHTGVEKQVRREIEIQSNLR-----  
PLGRGKFGHVYLAREKRS-NHIVALKVLFKSQLQSSQ-VEHQLRREVEIQSHLR-----  
PLGRGKFGNVYLAREKRS-NHIVALKVLFKSQLKQSQ-VEHQLRREVEIQSHLR-----  
PLGRGKFGHVYLAREKRS-NHIVALKVLFKSQLKQSQ-VEHQLRREVEIQSHLR-----  
PLGKGKFGNVYLAREKKH-QFIVALKVLFKSQMEKEG-VEHQLRREIEIQSHLK-----  
PLGKGKFGNVYLARERQS-KFILALKVLFKQLEKAG-VEHQLRREVEIQSHLR-----  
PLGKGKFGNVYLARVKEL-QAIVALKVLFKSQMEKEG-VEHQLRREIEIQAHLQ-----  
PLGKGKFGNVYLARLKDS-HFIVALKVLFKSQIEKEG-MEHQLRREIEIQAHLQ-----  
PLGKGKFGNVYLAREKQS-KFILALKVLFKAQLEKAG-VEHQLRREVEIQSHLR-----  
PLGKGKFGNVYLAREKKS-HFIVALKVLFKSQIEKEG-VEHQLRREIEIQAHLQ-----  
PLGKGKFGNVYLAREKQS-KFILALKVLFKTQLEKAG-VEHQLRREVEIQSHLR-----  
PLGKGKFGNVYLAREKQS-KFILALKVLFKQLEKAG-VEHQLRREVEIQSHLR-----  
PLGKGKFGNVYLAREKKH-QFIVALKVLFKSQMEKEG-VEHQLRREIEIQSHLK-----  
PLGKGKFGNVYLAREKQS-KFILALKVLFKAQLEKAG-VEHQLRREVEIQSHLR-----  
PLGKGKFGNVYLARLKES-HFIVALKVLFKSQIEKEG-LEHQLRREIEIQAHLQ-----  
PLGKGKFGNVYLAREKKS-RFIVALKVLFKSQIEKEG-VEHQLRREIEIQAHLQ-----  
PLGKGKFGNVYLAREKKS-RFIVALKVLFKSQIEKEG-VEHQLRREIEIQAHLQ-----  
PLGKGKFGNVYLARLKEN-HFIVALKVLFKSQIEKEG-LEHQLRREIEIQAHLQ-----  
PLGKGKFGNVYLAREKQS-KFILAIKVLFKAQLEKAG-VEHQLRREVEIQSHLR-----  
PLGKGKFGNVYLARLKES-HFIVALKVLFKSQIEKEG-LEHQLRREIEIQAHLQ-----  
PLGKGKFGNVYLAREKQS-KFILALKVLFKSQIEKEG-LEHQLRREIEIQAHLQ-----  
PLGKGKFGNVYLAREKRS-KYIVALKLMFKSQLVKAG-VEHQLRREIEIQTHLR-----  
PLGRGKFGHVYLAREKRS-NQIVALKVLFKSQLKQSQ-VEHQLRREVEIQSHLR-----  
PLGKGKFGNVYLAREKQS-KFILALKVLFKAQLEKAG-VEHQLRREVEIQSHLR-----  
PLGKGKFGNVYLAREKKS-HFIVALKVLFKSQIEKEG-VEHQLRREIEIQAHLQ-----  
PLGKGKFGNVYLAREKKS-HFIVALKVLFKSQIEKEG-VEHQLRREIEIQAHLQ-----  
PLGKGKFGNVYLAREKQS-KFILALKVLFKAQLEKAG-VEHQLRREVEIQSHLR-----  
PLGKGKFGNVYLAREKQS-KFILALKVLFKAQLEKAG-VEHQLRREVEIQSHLR-----

gi|470261727|ref|XP\_004360485.1|/1-457  
gi|449486478|ref|XP\_002195961.2|/1-319  
gi|426243291|ref|XP\_004015492.1|/1-303  
gi|426237569|ref|XP\_004012730.1|/1-344  
gi|410979749|ref|XP\_003996244.1|/1-344  
gi|410953494|ref|XP\_003983405.1|/1-405  
gi|410914403|ref|XP\_003970677.1|/1-332  
gi|389641901|ref|XP\_003718583.1|/1-397  
gi|389635857|ref|XP\_003715581.1|/1-400  
gi|357126095|ref|XP\_003564724.1|/1-291  
gi|355703962|gb|EHH30453.1|/1-309  
gi|350538969|ref|INP\_001233545.1|/1-403  
gi|347966592|ref|XP\_321274.5|/1-404  
gi|345800233|ref|XP\_849906.2|/1-344  
gi|344296517|ref|XP\_003419953.1|/1-405  
gi|344290468|ref|XP\_003037331.1|/1-345  
gi|344269722|ref|XP\_003406697.1|/1-306  
gi|338709975|ref|XP\_001502047.3|/1-304  
gi|334312551|ref|XP\_001378079.2|/1-402  
gi|332848444|ref|XP\_511856.3|/1-344  
gi|330793523|ref|XP\_003284833.1|/1-359  
gi|321461440|gb|EFX72472.1|/1-304  
gi|308497987|ref|XP\_003111180.1|/1-306  
gi|302801442|ref|XP\_002982477.1|/1-288  
gi|302688103|ref|XP\_003033731.1|/1-328  
gi|297802712|ref|XP\_002869240.1|/1-290  
gi|281427796|ref|INP\_001164000.1|/1-322  
gi|268565413|ref|XP\_002639437.1|/1-302  
gi|260784959|ref|XP\_002587531.1|/1-282  
gi|226499040|ref|INP\_001148791.1|/1-296  
gi|224088986|ref|XP\_002308590.1|/1-293  
gi|215983064|ref|INP\_001135979.1|/1-405  
gi|213404608|ref|XP\_002173076.1|/1-346  
gi|198430178|ref|XP\_002119314.1|/1-305  
gi|196012778|ref|XP\_002116251.1|/1-270  
gi|168044897|ref|XP\_001774916.1|/1-297  
gi|159468203|ref|XP\_001692272.1|/1-292  
gi|158297402|ref|XP\_317640.3|/1-307  
gi|156368106|ref|XP\_001627537.1|/1-314  
gi|149734120|ref|XP\_001489320.1|/1-404  
gi|149724949|ref|XP\_001504864.1|/1-344  
gi|148225464|ref|INP\_001085657.1|/1-368  
gi|146172296|ref|XP\_001018388.2|/1-360  
gi|144226857|ref|INP\_001016859.2|/1-360  
gi|125524746|gb|EAY72860.1|/1-292  
gi|115749607|ref|INP\_898907.2|/1-344  
gi|115455545|ref|INP\_001051373.1|/1-309  
gi|115435032|ref|INP\_001042274.1|/1-292  
gi|84000031|ref|INP\_001033117.1|/1-402  
gi|83776600|ref|INP\_004208.2|/1-344  
gi|76253851|ref|INP\_695208.2|/1-397  
gi|68013217|ref|INP\_001018849.1|/1-355  
gi|66815573|ref|XP\_641803.1|/1-384  
gi|62865639|ref|INP\_001015878.1|/1-309  
gi|62857967|ref|INP\_001016570.1|/1-415  
gi|57525577|ref|INP\_001003640.1|/1-405  
gi|50759065|ref|XP\_425725.1|/1-409  
gi|50303387|ref|XP\_451635.1|/1-361  
gi|46358064|ref|INP\_035627.1|/1-417  
gi|45198420|ref|INP\_985449.1|/1-367  
gi|38327570|ref|INP\_940838.1|/1-403  
gi|17505246|ref|INP\_491714.1|/1-305  
gi|17137514|ref|INP\_477336.1|/1-329  
gi|17136516|ref|INP\_476749.1|/1-411  
gi|16758580|ref|INP\_446201.1|/1-343  
gi|15233958|ref|INP\_195009.1|/1-294  
gi|15225495|ref|INP\_182073.1|/1-288  
gi|16708213|gb|AAF25838.1|/1-282  
gi|6325047|ref|INP\_015115.1|/1-367  
gi|2979623|gb|IAC12683.1|/1-345  
PLGRGRFGVYVLAREKKS-KFVVALKVLFSQLQAAN-IEHQLRREIEIQSHLR-----  
PLGKGKFGNVYLAREKQS-KFILALKVLFKTQLEEAG-VEHQLRREVEIQSHLR-----  
PLGKGKFGNVYLARELKK-NHFIVALKVLFKSQIEKEG-LEHQLRREVEIQAHQLQ-----  
PLGKGKFGNVYLAREKKS-HFIVALKVLFKSQIEKEG-VEHQLRREIEIQAHQLQ-----  
PLGKGKFGNVYLAREKKS-HFIVALKVLFKSQIEKEG-VEHQLRREIEIQAHQLQ-----  
PLGKGKFGNVYLAREKQS-KFILALKVLFKAQLEKAG-VEHQLRREVEIQSHLR-----  
PLGKGKFGNVYLARVKKL-EAIVALKVLFKSQMEKEG-VEHQLRREIEIQSHLK-----  
PLGKGKFGNVYLARERTT-GFICALKVLKYKKELESQS-VEKQVRREIEIQTNLC-----  
PLGRGKFGVYLAREHEH-GFVCALKVLHKRELQDAH-VERQVQREIEIQSNLR-----  
ALGRGKFGHVYLAREKRS-NQIVALKVLFKSQLKQSQ-VEHQLRREVEIQSHLR-----  
PLGKGKFGNVYLARLKES-HFIVALKVLFKSQIEKEG-LEHQLRREIEIQAHQLQ-----  
PLGKGKFGNVYLAREKQS-KFILALKVLFKAQLEKAG-VEHQLRREVEIQSHLR-----  
PLGRGKFGNVYLAREKET-KFVIALKVLFKKQVHAQG-IEHQVRREIEIQSHLR-----  
PLGKGKFGNVYLAREKKS-HFIVALKVLFKSQIEKEG-VEHQLRREIEIQAHQLQ-----  
PLGKGKFGNVYLAREKQS-KFILALKVLFKAQLEKAG-VEHQVRREVEIQSHLR-----  
PLGKGKFGNVYLAREKKS-HFIVALKVLFKSQIEKEG-VEHQLRREIEIQAHQLQ-----  
PLGKGKFGNVYLARLQEN-HFLVALKVLFKSQIEKEG-LEHQLRREIEIQAHQLQ-----  
PLGKGKFGNVYLARLKES-HFIVALKVLFKSQIEKEG-LEHQLRREIEIQAHQLQ-----  
PLGKGKFGNVYLAREKQS-KFILALKVLFKAQLEKAG-VEHQLRREVEIQSHLR-----  
PLGKGKFGNVYLAREKKS-HFIVALKVLFKSQIEKEG-VEHQLRREIEIQAHHLQ-----  
LLGMGRFGHVYLAREKKS-QFIVALKVLFKYQLQTHN-IEHQLRREIEIQSHLR-----  
PLGKGKFGNVYLAREINT-KYIVALKVLFKSQLQKQ-VEHQLRREIEIQSHLR-----  
PLGKGKFGSVYLARTKEG-HFHCAIKVLFKSQLISGG-VEHQLEREIEIQSHLH-----  
PLGRGKFGNVYLAREKRS-KYVVALKVLKFNQLQSQ-VEHQLRREIEIQSHLR-----  
PLGKGKFGVYVMVRTKAEPKYILALKTYLKESEIVQSR-VEKQIRREIEIQSHLR-----  
PLGRGKFGHVYLAREKRS-NHIVALKVLFKSQLQSQ-VEHQLRREVEIQSHLR-----  
PLGRGKFGNVYLAREKQS-KFVVALKVLFKSAIKDFN-NEHQVRREIEIQSHLR-----  
PLGKGKFGSVYLARTKTG-HFHCAIKVLFKSQLISGG-VEHQLEREIEIQSHLQ-----  
PLGKGKFGNVYLAREKNS-KFIVALKVLFKSQLMKAG-VEHQLRREIEIQSHLR-----  
PLGRGKFGHVYLAREKRS-SEIVALKVLFKSQLKQSQ-VEHQLRREVEIQSHLR-----  
PLGRGKFGHVYLAREKRS-NHIVALKVLFKSQLQSQ-VEHQLRREVEIQSHLR-----  
PLGKGKFGNVYLAREKQS-KFILALKVLFKAQLEKAG-VEHQLRREIEIQSHLK-----  
PLGKGKFGNVYLAREKKT-GYVVALKTLHKEELVHKS-VERQVRREIEIQSNLR-----  
PLGRGKFGSVYLAREKKS-KFIVALKVLFKSQLMKN-VEHQLRREIEIQSHLR-----  
PLGKGKFGSVYLAREKQS-KYIVALKVLFKSQLKAN-VEHQLRREIEIQSHLR-----  
PLGRGKFGNVYLAREKQS-KYVVALKVLKFNQLQSQ-VEHQLRREIEIQSHLR-----  
PLGKGKFGNVYLAREKQS-KYIVALKVLFKSQLQSN-VEHQLRREIEIQSHLR-----  
ALGRGKFGNVYLARERET-GFMVAMKVMFKSQLTKWH-VEKQLRREIEIQSHLR-----  
PLGKGKFGNVYLAREKKS-KYIVALKVLFKSQLKSN-VEHQLRREIEIQSHLR-----  
PLGKGKFGNVYLAREKQS-KFILALKVLFKAQLEKAG-VEHQLRREVEIQSHLR-----  
PLGKGKFGNVYLAREKKS-HFIVALKVLFKSQIEKEG-VEHQLRREIEIQAHQLQ-----  
PLGKGKFGNVYLAREKQN-KFIMALKVLFKSQLKEG-VEHQLRREIEIQSHLR-----  
PLGRGKFGVHLAREKRS-NFIVALKCISKEQLRRSK-IEHQIRREIEIQSHLN-----  
PLGKGKFGNVYLARDKQN-KFIMALKVLFKSQLKEG-VEHQLRREIEIQSHLR-----  
PLGRGKFGHVYLAREKRS-NHIVALKVLFKSQLKQSQ-VEHQLRREVEIQSHLR-----  
PLGKGKFGNVYLAREKKS-HFIVALKVLFKSQIEKEG-VEHQLRREIEIQAHQLQ-----  
YIGEGKFGKVYLAREKQS-GYVVALKVTFAKLDKYR-FHAHLRREIEIQHGLD-----  
PLGRGKFGHVYLAREKRS-NHIVALKVLFKSQLKQSQ-VEHQLRREVEIQSHLR-----  
PLGKGKFGNVYLAREKQS-KFILALKVLFKAQLEKAG-VEHQLRREVEIQSHLR-----  
PLGKGKFGNVYLAREKKS-HFIVALKVLFKSQIEKEG-VEHQLRREIEIQAHHLQ-----  
PLGKGKFGNVYLAREKQS-KFILALKVLFKVQLEKAG-VEHQLRREVEIQSHLR-----  
PLGKGKFGVYLAREKKT-GFIVALKTLHKSSELVQSK-IEKQVRREIEIQSNLR-----  
LLGMGRFGHVYLAREKKS-QFIVALKVLKFNQLQTHN-IEHQLRREIEIQSHLR-----  
PLGKGKFGNVYLARLKES-HFIVALKVLFKSQIEKEG-LEHQLRREIEIQAHQLQ-----  
PLGKGKFGNVYLARERES-KFILALKVLFKTQLEKAG-VEHQLRREVEIQSHLR-----  
ALGKGKFGSVYLAREQQT-KFILALKVLFKKQLEKAG-VEHQLRREVEIQSHLR-----  
PLGKGKFGNVYLAREKQS-KFILALKVLFKAQLEDAG-VEHQLRREVEIQSHLR-----  
ILGKGKFGKVYCVKHRET-GLICALKAMEKKEIVQYT-IQKQFRREVEIQGSFK-----  
PLGKGKFGNVYLAREKQS-KFILALKVLFKTQLEKAN-VEHQLRREVEIQSHLR-----  
VLGKGKFGRVYCVRHIES-GFVCALKAMEKKDIIQYN-IEKQFRREVEIQSSLR-----  
PLGKGKFGNVYLAREKQS-KFILALKVLFKAQLEKAG-VEHQLRREVEIQSHLR-----  
PLGKGKFGSVYLARTKTG-HFHVAIKVLFKSQLISGG-VEHQLEREIEIQSHLN-----  
HLGRGKFGVYLAREHRS-HYLVAMKVMFKEELRKGK-VQRQVLRREIEIQSRLK-----  
LLGRGKFGNVYLAREKES-QFVVALKVLFKRQIGESN-VEHQVRREIEIQSHLR-----  
PLGKGKFGNVYLAREKKS-RFIVALKILFKSQIEKEG-VEHQLRREIEIQAHKL-----  
PLGRGKFGHVYLAREKRS-NHVVALKVLFKSQLQSQ-VEHQLRREVEIQSHLR-----  
PLGKGKFGVYLAREAKS-KYIVALKVIFKEQIEKYK-IHHQLRREMEIQTSLR-----  
PLGRGKFGNVYLARLKEN-HFIVALKVLFKSEIEKEG-LEHQLRREVEIQSHLR-----  
KLGKGKFGKVYCVRHRS-GYICALKVMKEEIIKYN-LQKQFRREVEIQTSLN-----  
PLGKGKFGNVYLAREKKS-RFIVALKILFKSQIEKEG-VEHQLRREIEIQAHKL-----

:\* \*\* \* : : \* : \* : . : \*\* : \*\* :

XP\_020952967.1/1-297  
XP\_012380002.1/1-290  
XP\_006102660.1/1-339  
XP\_005673091.1/1-402  
XP\_004484680.1/1-405  
XP\_004462482.1/1-349  
Q6NW76.1/1-320  
NP\_999084.2/1-344  
gi|1190438012|ref|XP\_020822491.1|/1-365  
gi|1190373986|ref|XP\_020837071.1|/1-405  
gi|1154067554|ref|NP\_001153906.2|/1-332  
gi|1131237831|ref|XP\_019799799.1|/1-344  
gi|1131178530|ref|XP\_019784431.1|/1-296  
gi|1126479796|ref|XP\_006940862.2|/1-308  
gi|1113784803|ref|XP\_019353949.1|/1-376  
gi|1022987698|ref|XP\_016286291.1|/1-365  
gi|1966994491|ref|XP\_014974040.1|/1-344  
gi|1966965902|ref|XP\_015004225.1|/1-398  
gi|1955535802|ref|XP\_004439167.2|/1-335  
gi|1951053762|ref|XP\_014465099.1|/1-416  
gi|1946796851|ref|XP\_014384184.1|/1-404  
gi|1946756071|ref|XP\_014392719.1|/1-299  
gi|1922383691|ref|XP\_013462066.1|/1-300  
gi|1909794683|ref|XP\_013153467.1|/1-419  
gi|1891599507|ref|XP\_013025412.1|/1-351  
gi|1891565640|ref|XP\_013019059.1|/1-351  
gi|1884853217|ref|XP\_013010870.1|/1-315  
gi|1830244266|ref|XP\_012590158.1|/1-296  
gi|1828211890|ref|XP\_012558808.1|/1-339  
gi|1820033943|ref|NP\_001295465.1|/1-282  
gi|1795377289|ref|XP\_011750175.1|/1-471  
gi|1779989227|ref|XP\_011666707.1|/1-321  
gi|1761905244|ref|XP\_0114402440.1|/1-385  
gi|1759175630|ref|XP\_011377486.1|/1-303  
gi|1759149200|ref|XP\_011368486.1|/1-311  
gi|1759116391|ref|XP\_011357226.1|/1-339  
gi|1758991346|ref|XP\_0957232.2|/1-420  
gi|1743922878|ref|XP\_011005517.1|/1-293  
gi|1698438703|ref|XP\_009757361.1|/1-296  
gi|1697188794|ref|XP\_009603442.1|/1-294  
gi|1658871623|ref|XP\_008418750.1|/1-330  
gi|1657559162|ref|XP\_008283516.1|/1-424  
gi|1657529148|ref|XP\_008293452.1|/1-319  
gi|1655887082|ref|XP\_008247187.1|/1-292  
gi|1655881324|ref|XP\_008272369.1|/1-402  
gi|1655868725|ref|XP\_008268971.1|/1-343  
gi|1641774253|ref|XP\_008170712.1|/1-431  
gi|1620969612|ref|XP\_007654691.1|/1-303  
gi|1617451788|ref|XP\_007568855.1|/1-331  
gi|1594674988|ref|XP\_007185333.1|/1-402  
gi|1594654199|ref|XP\_007175509.1|/1-282  
gi|1594623572|ref|XP\_007166415.1|/1-344  
gi|1584038001|ref|XP\_006753367.1|/1-368  
gi|1573912300|ref|XP\_006643864.1|/1-292  
gi|1554569173|ref|XP\_005878848.1|/1-339  
gi|1545541126|ref|XP\_005635254.1|/1-405  
gi|1545487136|ref|XP\_005616134.1|/1-307  
gi|1544514002|ref|XP\_005590555.1|/1-471  
gi|1530653727|ref|XP\_005313062.1|/1-365  
gi|1528993703|ref|XP\_005219854.1|/1-303  
gi|1524890835|ref|XP\_005403159.1|/1-332  
gi|1514776534|ref|XP\_004968502.1|/1-292  
gi|1507960369|ref|XP\_004686961.1|/1-405  
gi|1507953708|ref|XP\_004684672.1|/1-344  
gi|1478517838|ref|XP\_004433150.1|/1-344  
gi|1478512086|ref|XP\_004430306.1|/1-405  
gi|1470628341|ref|XP\_004321082.1|/1-402  
-----HPNILRLYNYFHDARRVYLILEYAPRGELYKELQKS--HTLDEQRTAT-IMEELA  
HPSSRHHNILRLYNYFHDTRRVYLILEYAPRGELYKELQKS--CTLDEQRTAT-IMEELA  
-----HPNILRLYNYFYDRRIYLILEYAPRGELYKELQKS--RTFDQRTAT-IMEELA  
-----HPNILRLYGYFHDATRVYLILEYAPLGAVYRELQKL--SKFDEQRTAT-YITELA  
-----HPNILRLYGYFHDATRVYLILEYAPLGAVYRELQKL--SKFDEQRTAT-YITELA  
-----HPNILRLYNYFYDRRRVYLILEYAPRGELYKELQKS--RTFDEQRTAT-IMEELA  
-----HPNILRFYNYFHDDTRVFLILEYAPRGEMYKELQRY--GRFDDQRTAT-YMEEVS  
-----HPNILRLYNYFYDRRIYLILEYAPRGELYKELQKC--RTFDEQRTAT-IMEELA  
-----HPNILRLYNYFHDRSRVYLILEYAPRGELYKELQKS--HTFDQRTAT-IMEELA  
-----HPNILRLYGYFHDATRVYLILEYAPRGVYRELQKL--SKFDEQRTAT-YITELA  
-----HPNILRFYNYFHDRKRVFLILEYAPRGEMYKELQKY--QRFDDQRTAT-YMEEIS  
-----HPNILRLYNYFYDRRIYLILEYAPRGELYKELQKS--HTFDEQRTAT-IMEELA  
-----HPNILRLYNYFHDARRMYLILEYAPRGELYKELQKS--HTLDEQRTAT-IMEELA  
-----HPNILRLYNYFHDARRVYLILEYAPRGELYKELQKS--NTLDEQHTAT-IMEELA  
-----HPNILRLYNYFHDRRRVYLILEYAPRGELYKELQKC--RRFDEQRSAT-IMEELA  
-----HPNILRLYNYFHDRRRVYLILEYAPRGELYKELQKS--HTFDQLRTAT-IMEELA  
-----HPNILRLYNYFYDRRIYLILEYAPRGELYKELQKS--RTFDEQRTAT-IMEELA  
-----HPNILRLYGYFHDATRVYLILEYAPLGTVYRELQKL--SKFDEQRTAT-YITELA  
-----HPNILRLYNYFHDARRVYLILEYAPRGELYKELQKS--HTLDEQRTAT-IMEELA  
-----HPNILRLYGYFHDATRVYLILEYAPRGVYRELQKL--TKFDEQRTAN-YITELA  
-----HPNILRLYGYFHDATRVYLILEYAPLGTVYRELQKL--SRFDEQRTAT-YITELT  
-----HPNILRLHNYFHDERXVYLILEYAPRGELYKELQKS--HTIDEQSTAT-IMEELA  
-----HPHILRLYGYFYDQKRIVYLILEYAPKGELYKELQKC--KYFSERRAAT-YVASLA  
-----HPNILRLYGYFHDVTRVYLILEYAPRGVYRELQKL--TKFDEQRTAT-YITELA  
-----HKNILRLFGHFHDEKRIFLILEFAGRGELYQHLRRA--SRFPESTAAT-YIYQMA  
-----HKNILRLFGHFHDEKRIFLILEFAGRGELYQHLRKA--SRFSESTAAT-YIYQMA  
-----HPNILRLYNYFHDARRXYLIVEYAPRGELYKELLRS--RTLDEQRTAT-IVEELA  
-----HPNILRLYNYFHDARRVYLILEYAPRGELYKELQNC--HTLDEQRTAT-IMEELA  
-----HPHILRLYGYFYDAKRIVYLILEYAPQGELYKHLTKS--ERFNEAKSAT-YISQLA  
-----HPNILRLYNYFYDDSRVYLILEYAPRGELYKELQRN--QKLNQRTAT-IMEELS  
-----HPNILRLYNYFHDARRVYLILEFAPRGELYKELQKS--EKLDEQRTAT-IMEELA  
-----HPNILRLFGYFYDESRYVYLILEYAPRGELYKQLQRA--GRFDEQRTAS-YISQLA  
-----HPNILRLYGYFYDDTRVYLILEYAPRGELYKILQKE--GTFSERQSAI-YIKQLA  
-----HPNILRLYNYFHDARRVYLILEYAPRGELYRELQKS--QTLDEQRTAT-IMEELA  
-----HPNILRLYGYFHDATRVYLILEYAPLGAVYRELQKL--SRFDEQRTAT-YITELA  
-----HPNILRLYNYFYDRRIYLILEYAPRGELYKELQKS--RTFDEQRTAT-IMEELA  
-----HPNILKLFGYFHDHDKRIVYLILEYAGKELYKHLRKE--NRFPEWKAQ--YVAQMA  
-----HPNILRLYGYFYDQKRIVYLILEYAAKELYKELQKC--KYFSERRAAT-YVASLA  
-----HPNILRLYGYFYDQKRIVYLILEYAAKELYKELQKC--KYFSERRAAT-YVASLA  
-----HPNILRLYGYFYDQKRIVYLILEYAAKELYKELQKC--KYFSERRAAT-YVASLA  
-----HPNILRFYNYFHDRKRVFLILEYAPRGEMYKELQKY--GRFDDQRTAT-YMEEIS  
-----HPNILRLYGYFHDTSRVYLILEFAPKGELYSELQRS--GNFPESQSAT-YIMELA  
-----HPNILRFYNYFHDRKRVFLILEYAPRGEMYKELQRC--GRFDDRTAT-YMEEIS  
-----HPNILRLYNYFHDARRIYLILEYAPRGELYKELQKC--HTLDEQRTAT-IMEELA  
-----HPNILRLYGYFHDATRVYLILEYAPLGTVYRELQKL--SKFDEQRTAT-YITELA  
-----HPNILRLYNYFYDRRIYLILEYAPRGELYKELQKS--RTFDEQRTAT-IMEELA  
-----HPNILRLYGYFHDATRVYLILEYAPRGVYRELQKL--TKFDEQRTAT-YMTELA  
-----HPNILRLYGYFHDATRVYLILEYAPRGVYRELQKF--SKFDEQRTAT-YITELA  
-----HPNILRFYNYFHDKRVFLILEYAPRGEMYKELQKY--GRFDDQRTAT-YMEEIS  
-----HPNILRLYGYFHDATRVYLILEYAPLGAVYRELQKL--SKFDEQRTAT-YITELA  
-----HPNILRLYNYFHDARRMYLILEYAPRGELYKELQKS--HTLDEQRTAT-YMEELA  
-----HPNILRLYNYFYDRRIYLILEYAPRGELYKELQKS--RTFDEQRTAT-IMEELA  
-----HPNILRLYNYFHDERRVYLILEYAPRGELYKELQKS--HTIDEQRAAT-IMEELA  
-----HSNILRLYGYFYDQTRVYLILEYAAKELYKELQRC--KHFSERRSAT-YIASLA  
-----HPNILRLYNYFYDRRIYLILEYAPRGELYKELQKS--RTFDQRTAT-IMEELA  
-----HPNILRLYGYFHDATRVYLILEYAPLGAVYRELQKL--SKFDEQRTAT-YITELA  
-----HPNILRLYNYFHDARRVYLILEYAPRGELYKELQKS--HTLDEQHTAT-IMEELA  
-----HPNILRLYNYFHDARRVYLILEFAPRGELYKELQKS--EKLDEQRTAT-IMEELA  
-----HPNILRLYNYFHDKRVYLILEYAPRGELYKELQKC--RQFDEQKTAT-FMEELA  
-----HPNILRLYNYFHDARRVYLILEYAPKGELYKALQRS--HTFDEQRTAT-IMEELA  
-----HPNILKLFGYFHDESRVYLILEYAPKGELYKDLQRQ--KRFDARSK-YIAQLA  
-----HPNILRLYGYFYDQTRVYLILEYAAKELYKELTRC--KHFSERRSAT-YIASLA  
-----HPNILRLYGYFHDATRVYLILEYAPLGAVYRELQKL--SKFDEQRTAT-YITELA  
-----HPNILRLYNYFYDRRIYLILEYAPRGELYKELQKS--RTFDEQRTAT-IMEELA  
-----HPNILRLYNYFYDRRIYLILEYAPRGELYKELQKS--RTFDEQRTAT-IMEELA  
-----HPNILRLYGYFHDATRVYLILEYAPLGAVYRELQKL--SKFDEQRTAT-YITELA  
-----HPNILRLYGYFHDATRVYLILEYAPLGAVYRELQKL--SKFDEQRTAT-YITELA

gi|470261727|ref|XP\_004360485.1|/1-457  
gi|449486478|ref|XP\_002195961.2|/1-319  
gi|426243291|ref|XP\_004015492.1|/1-303  
gi|426237569|ref|XP\_004012730.1|/1-344  
gi|410979749|ref|XP\_003996244.1|/1-344  
gi|410953494|ref|XP\_003983405.1|/1-405  
gi|410914403|ref|XP\_003970677.1|/1-332  
gi|389641901|ref|XP\_003718583.1|/1-397  
gi|389635857|ref|XP\_003715581.1|/1-400  
gi|357126095|ref|XP\_003564724.1|/1-291  
gi|355703962|gb|EHH30453.1|/1-309  
gi|350538969|ref|INP\_001233545.1|/1-403  
gi|347966592|ref|XP\_321274.5|/1-404  
gi|345800233|ref|XP\_849906.2|/1-344  
gi|344296517|ref|XP\_003419953.1|/1-405  
gi|344290468|ref|XP\_003416960.1|/1-345  
gi|344269722|ref|XP\_003406697.1|/1-306  
gi|338709975|ref|XP\_001502047.3|/1-304  
gi|334312551|ref|XP\_001378079.2|/1-402  
gi|332848444|ref|XP\_511856.3|/1-344  
gi|330793523|ref|XP\_003208483.1|/1-359  
gi|321461440|gb|EFX72472.1|/1-304  
gi|308497987|ref|XP\_003111180.1|/1-306  
gi|302801442|ref|XP\_002982477.1|/1-288  
gi|302688103|ref|XP\_003033731.1|/1-328  
gi|297802712|ref|XP\_002869240.1|/1-290  
gi|281427796|ref|INP\_001164000.1|/1-322  
gi|268565413|ref|XP\_002639437.1|/1-302  
gi|260784959|ref|XP\_002587531.1|/1-282  
gi|226499040|ref|INP\_001148791.1|/1-296  
gi|224088986|ref|XP\_002308590.1|/1-293  
gi|215983064|ref|INP\_001135979.1|/1-405  
gi|213404608|ref|XP\_002173076.1|/1-346  
gi|198430178|ref|XP\_002119314.1|/1-305  
gi|196012778|ref|XP\_002116251.1|/1-270  
gi|168044897|ref|XP\_001774916.1|/1-297  
gi|159468203|ref|XP\_001692272.1|/1-292  
gi|158297402|ref|XP\_317640.3|/1-307  
gi|156368106|ref|XP\_001627537.1|/1-314  
gi|149734120|ref|XP\_001489320.1|/1-404  
gi|149724949|ref|XP\_001504864.1|/1-344  
gi|148225464|ref|INP\_001085657.1|/1-368  
gi|146172296|ref|XP\_001018388.2|/1-360  
gi|144226857|ref|INP\_001016859.2|/1-360  
gi|125524746|gb|EAY72860.1|/1-292  
gi|115749607|ref|INP\_898907.2|/1-344  
gi|115455545|ref|INP\_001051373.1|/1-309  
gi|115435032|ref|INP\_001042274.1|/1-292  
gi|84000031|ref|INP\_001033117.1|/1-402  
gi|83776600|ref|INP\_004208.2|/1-344  
gi|76253851|ref|INP\_695208.2|/1-397  
gi|68013217|ref|INP\_001018849.1|/1-355  
gi|66815573|ref|XP\_641803.1|/1-384  
gi|62865639|ref|INP\_001015878.1|/1-309  
gi|62857967|ref|INP\_001016570.1|/1-415  
gi|57525577|ref|INP\_001003640.1|/1-405  
gi|50759065|ref|XP\_425725.1|/1-409  
gi|50303387|ref|XP\_451635.1|/1-361  
gi|46358064|ref|INP\_035627.1|/1-417  
gi|45198420|ref|INP\_985449.1|/1-367  
gi|38327570|ref|INP\_940838.1|/1-403  
gi|17505246|ref|INP\_491714.1|/1-305  
gi|17137514|ref|INP\_477336.1|/1-329  
gi|17136516|ref|INP\_476749.1|/1-411  
gi|16758580|ref|INP\_446201.1|/1-343  
gi|15233958|ref|INP\_195009.1|/1-294  
gi|15225495|ref|INP\_182073.1|/1-288  
gi|6708213|gb|IAAF25838.1|/1-282  
gi|6325047|ref|INP\_015115.1|/1-367  
gi|2979623|gb|IAAC12683.1|/1-345  
-----HPNILRLYGYFYDESRYVLIIEFAKGGECKELQAV--QRFTEKVAAT-YTIQIA  
-----HPNILRLYGYFHDVTRVYLILEHAPRGVEYRELQRL--SKFDEQRTAT-YITELA  
-----HPNILRLYNYFHDARRVYLILEYAPKGELYKALQRS--HTFDEQRTAT-IIIEELA  
-----HPNILRLYNYFYDRRIYLILEYAPRGELYKELQKS--RTFDEQRTAT-IMEELA  
-----HPNILRLYNYFYDRRIYLILEYAPRGELYKELQKS--RTFDEQRTAT-IMEELA  
-----HPNILRLYGYFHDATRVYLILEYAPLGAVYRELQKL--SKFDEQRTAT-YITELA  
-----HPNILRFYNYFHDRKRVFLVLE YAPRGEMYKELQRC--GRFDDQRTAT-YMEEIS  
-----HPNILKMYGFHDKRIFLILEFAGKGELYKHLRKE--NRFPEWKAQ-YVAQMA  
-----HPNILKMYGFHDSKRIFIIEFAGKGELYKHLRKE--TRFPEWRAAQ-CIAQMA  
-----HPNILRLYGYFYDQTRVYLILEYAAKGELYKELQRC--KHFSERRSAT-YIASLA  
-----HPNILRLYNYFHDARRVYLILEFAPRGELYKELQKS--EKLEQRTAT-IIIEELA  
-----HPNILRLYGYFHDATRVYLILEYAPLGTVYRELQKL--SKFDEQRTAT-YITELA  
-----HPNILRMGYGFHDESRIYLILEYAPGGTLFKEQQQPGKRFPEKRCAT-YVYSLV  
-----HPNILRLYNYFYDRRIYLILEYAPRGELYKELQKS--HTFDEQRTAT-IMEELA  
-----HPNILRLYGYFHDATRVYLILEYAPLGTVYRELQKX--SKFDEQRTAPXYITELA  
-----HPNILRLYNYFYDRRIYLILEYAPRGELYKELQKS--RTFDEQRTAT-IMEELA  
-----HPNILRLYNYFHDARRVYLILEYAPRGELYKELQKS--HRLDEQRTAT-IMEELA  
-----HPNILRLYNYFHDARRVYLILEYAPRGELYKELQKS--HTLDEQRTAT-IMEELA  
-----HPNILRLYGYFHDATRVYLILEYAPRGVEYRELQKL--SKFDEQRTAT-YITELA  
-----HPNILRLYNYFYDRRIYLILEYAPRGELYKELQKS--RTFDEQRTAT-IMEELA  
-----HPNILRLFGYFYDEKRVFLIIEFAKGGECKELQKV--GSFNEMTAAT-YTLQIA  
-----HPNVLRMGYGFYDETRIYLILEFAGNGEMYKYLKROPNGRFSEPQTAN-YMAQLA  
-----HPNIVRLYTYFWDACKIYLVLE YAPGGEMYKSLTNQ--KRFTVMAAGK-ymyeia  
-----HPNILRLYGYFYDQNRVYLILEYAAKGELYKELQRC--KVFSEKRAAT-YIASLA  
-----HPNVLRLYGYFHDDEKRIFLMLEFAGKGELYKQLSKH--GCFSEKRSAR-YIDQMA  
-----HPNILRLYGYFYDQKRVYLILEYAAARGELYKELQKC--KYFSERRAAT-YVASLA  
-----HNNILRMGYGFHDESRYVILIIEYAPNGTCYKALQAAPNRRFPEETCAR-YIRQIA  
-----HPNIIRLYNYFWDACKIYLILEYAPGGEMYKQLTTQ--KRFTVMAAGK-ymyeia  
-----HPHILRLYGYFYDDTRVYLILEYAPRGELYKELQKQ--VRFDERRSAT-YIAQLA  
-----HPNILRLYGYFYDQTRVYLILEYAAKGELYKELTRC--KHFSERRAT-YVASLA  
-----HPNILRLYGYFYDQKRVYLILEYAAKGELYKELQKC--KYFSERRAAT-YVASLA  
-----HPNILRLYGYFHDATRVYLILEYAPLGAVYRELQKL--SKFDEQRTAT-YITELA  
-----HKNILRLFGYFHDDEKRIFLILEFAGRGELYKHLRRQ--QRFSEELSAK-YIFQMA  
-----HPNILRLYGYFHDATRVYLILEYASRGEMYKELQKQ--GKFTTEMSAT-YIAELA  
-----HPNILRLYGYFYDTSRVYLILEFAPGGELYKELQRC--KVFDEPRAAK-FIAQLS  
-----HPNILRLYGYFYDQARVYLILEYAAKGELYKELQRC--KVFSEKRAAT-YIASLA  
-----HPNILRLYGYFYDKEKRVYLILEYAAARGELYKELVRC--NHFDERTSAT-YIISLA  
-----HPHILRLYTFWHDDEKRIYLALELAQOGELYKHLKAAPKGRFDERRSAR-YISQVA  
-----HNNILRLFGYFYDDTRVYLILEYAPRGELYKELTAC--EKFDEKRAAK-YIRQLA  
-----HPNILRLYGYFHDATRVYLILEYAPLGAVYRELQKL--SKFDEQRTAT-YITELA  
-----HPNILRLYNYFYDRRIYLILEYAPRGELYKELQKS--RTFDEQRTAT-IMEELA  
-----HPNILRMYNYFHDRKRIYLMLEFAPRGELYKELQKH--GRFDEQRSAT-FMEELA  
-----HKNVLRMGFFWDEQKIYLILEYAPQGYLQDLQKQINKRYPEQKAAN-YIKQMA  
-----HPNILRMYNYFHDRKRIYLMLEFAPRGELYKELQKH--GRFDEQRSAT-FMEELA  
-----HPNILRLYGYFYDQTRVYLILEYALKGELYKELQRC--KHFSERRSAT-YIASLA  
-----HPNILRLYNYFYDRRIYLILEYAPRGELYKELQKS--RTFDEQRTAT-IMEELA  
-----HPNVLRLFAWFHDAERVVVLVLE YAAARGELYKLRT--VRRFSERTAAAT-YVASLA  
-----HPNILRLYGYFYDQTRVYLILEYALKGELYKELQRC--KHFSERRSAT-YIASLA  
-----HPNILRLYGYFHDATRVYLILEYAPLGAVYRELQKL--SKFDEQRTAT-YITELA  
-----HPNILRLYNYFYDRRIYLILEYAPRGELYKELQKS--CTFDEQRTAT-IMEELA  
-----HPNILRLYGYFHDATRVYLILEYAPLGTVYRELQKL--SKFDEQRTAT-YITELA  
-----HKNILRLYGFHDEKRIYLILEFAGRGELYQHLRRA--KRFSEEVASK-YIFQMA  
-----HPNILRLFGYFYDDKRVFLIIEFAKGGECKELQKV--GSFNEQTAAT-YTLQIA  
-----HPNILRLYNYFHDARRVYLILEYAPRGELYKELQKS--EKLEQRTAT-IIIEELA  
-----HPNILRLYGYFHDAARVYLILDYAPGGELFRELQKV--TRFDEQKSAL-YIKQLA  
-----HPNILRLYGYFHDAARVYLILEFAPKGELYGELQRC--GTFDDQRSAT-YIMELA  
-----HPNILRLYGYFHDVTRVYLILEYAPRGVEYRELQKL--TKFDEQRTAT-YITELA  
-----HKNLTQLYGYFYDEKRVYLLMEYVYGYELKYFLKNN--GPLNETLAS-YVYQMA  
-----HPNILRLYGYFHDATRVYLILEYAPLGTVYRELQKL--SKFDEQRTAT-YITELA  
-----HPNLTQLYGYFHDEKRVYLLMEYLVNGELYKHLKGR--SHFNDDVASY-YVYQMA  
-----HPNILRLYGYFHDATRVYLILEYAPLGTVYRELQKL--SKFDEQRTAT-YITELA  
-----HPNITKLTYTYFWDACKIYLVLE YAPGGEMYKQLTVS--KRFSPTAAK-ymyeia  
-----HPHILRLTLWFHDESRIYLALEIASEGELFKHLRGAPNHRFDEPRSAK-YTYQVA  
-----HPHILRLYAYFHDDVRIYLILEYAPQGLTALQAQPMKRFDERQSAT-YIQELS  
-----HPNILQLYNYFYDQRIYLILEYAPRGELYKELQKS--GTFDEQRTAT-IMEELS  
-----HPNILRLYGYFYDQKRVYLILEYAAARGELYKDLQKC--KYFSERRAAT-YVASLA  
-----HPNILRLFGWFHDNERIFLILEYAHGGELYGLVQK--NGHLEQQAAT-YIASLS  
-----HPNILRLYNYFYDDTRIYLILEYAPGGELYKELQRH--QKLDQRTAT-YIQELS  
-----HPNLTGSYGFHDEKRVYLLMEYLVNGEMYKLLRLH--GPFNDILASD-YIYQIA  
-----HPNILQLYNYFYDQRIYLILEYAPRGELYKELQKS--RTFDEQRTAT-IMEELS

\* :: : \* \* : :: \* : : . :

XP\_020952967.1/1-297  
XP\_012380002.1/1-290  
XP\_006102660.1/1-339  
XP\_005673091.1/1-402  
XP\_004484680.1/1-405  
XP\_004462482.1/1-349  
Q6NW76.1/1-320  
NP\_999084.2/1-344  
gi|1190438012|ref|XP\_020822491.1|/1-365  
gi|1190373986|ref|XP\_020837071.1|/1-405  
gi|1154067554|ref|NP\_001153906.2|/1-332  
gi|1131237831|ref|XP\_019799799.1|/1-344  
gi|1131178530|ref|XP\_019784431.1|/1-296  
gi|1126479796|ref|XP\_006940862.2|/1-308  
gi|1113784803|ref|XP\_019353949.1|/1-376  
gi|1022987698|ref|XP\_016286291.1|/1-365  
gi|1966994491|ref|XP\_014974040.1|/1-344  
gi|1966965902|ref|XP\_015004225.1|/1-398  
gi|1955535802|ref|XP\_004439167.2|/1-335  
gi|1951053762|ref|XP\_014465099.1|/1-416  
gi|1946796851|ref|XP\_014384184.1|/1-404  
gi|1946756071|ref|XP\_014392719.1|/1-299  
gi|1922383691|ref|XP\_013462066.1|/1-300  
gi|1909794683|ref|XP\_013153467.1|/1-419  
gi|1891599507|ref|XP\_013025412.1|/1-351  
gi|1891565640|ref|XP\_013019059.1|/1-351  
gi|1884853217|ref|XP\_013010870.1|/1-315  
gi|1830244266|ref|XP\_012590158.1|/1-296  
gi|1828211890|ref|XP\_012558808.1|/1-339  
gi|1820033943|ref|NP\_01295456.1|/1-282  
gi|1795377289|ref|XP\_011750175.1|/1-471  
gi|1779989227|ref|XP\_011666707.1|/1-321  
gi|1761905244|ref|XP\_0114402440.1|/1-385  
gi|1759175630|ref|XP\_011377486.1|/1-303  
gi|1759149200|ref|XP\_011368486.1|/1-311  
gi|1759116391|ref|XP\_011357226.1|/1-339  
gi|1758991346|ref|XP\_0957232.2|/1-420  
gi|1743922878|ref|XP\_011005517.1|/1-293  
gi|1698438703|ref|XP\_009757361.1|/1-296  
gi|1697188794|ref|XP\_009603442.1|/1-294  
gi|1658871623|ref|XP\_008418750.1|/1-330  
gi|1657559162|ref|XP\_008283516.1|/1-424  
gi|1657529148|ref|XP\_008293493.1|/1-319  
gi|1655887082|ref|XP\_008247187.1|/1-292  
gi|1655881324|ref|XP\_008272369.1|/1-402  
gi|1655868725|ref|XP\_008268971.1|/1-343  
gi|1641774253|ref|XP\_008170712.1|/1-431  
gi|1620969612|ref|XP\_007654691.1|/1-303  
gi|1617451788|ref|XP\_007568855.1|/1-331  
gi|1594674988|ref|XP\_007185333.1|/1-402  
gi|1594654199|ref|XP\_007175509.1|/1-282  
gi|1594623572|ref|XP\_007166415.1|/1-344  
gi|1584038001|ref|XP\_006753367.1|/1-368  
gi|1573912300|ref|XP\_006643864.1|/1-292  
gi|1554569173|ref|XP\_005878848.1|/1-339  
gi|1545541126|ref|XP\_005635254.1|/1-405  
gi|1545487136|ref|XP\_005616134.1|/1-307  
gi|1544514002|ref|XP\_005590555.1|/1-471  
gi|1530653727|ref|XP\_005313062.1|/1-365  
gi|1528993703|ref|XP\_005219854.1|/1-303  
gi|1524890835|ref|XP\_0051031959.1|/1-332  
gi|1514776534|ref|XP\_004968502.1|/1-292  
gi|1507960369|ref|XP\_004686961.1|/1-405  
gi|1507953708|ref|XP\_004684672.1|/1-344  
gi|1478517838|ref|XP\_0051031959.1|/1-344  
gi|1478512086|ref|XP\_004430306.1|/1-405  
gi|1470628341|ref|XP\_004321082.1|/1-402  
DALTYCHEKKVIHRDIKPENLLLGFRGEVKIADFGWSVHTP-SLRRKTMCGTLDYLPPEM  
DALTYCHQQKVIHRDIKPENLLGLRGEVKIADFGWSVHTP-SLRRRTMCGTLDYLPPEM  
DALMYCHKKKVIHRDIKPENLLGLQGELKIADFGWSVHAP-SLRRKTMCGTLDYLPPEM  
NALSYCHSKRVIHRDIKPENLLGSAGELKIADFGWSVHAP-SSRRTTLCGTLDYLPPEM  
DALSYCHSKKVIHRDIKPENLLGSAGELKIADFGWSVHAP-SSRRTTLCGTLDYLPPEM  
DALMYCHGRKVIHRDIKPENLLGLRGELKIADFGWSVHAP-SLRRKTMCGTLDYLPPEM  
DALQYCHEKKVIHRDIKPENLLGYRGELKIADFGWSVHAP-SLRRRTMCGTLDYLPPEM  
DALIYCHGKKVIHRDIKPENLLGLQGELKIADFGWSVHAP-SLRRKTMCGTLDYLPPEM  
DALIYCHGKKVIHRDIKPENLLMGLRGELKIADFGWSVHAP-SLRRKTMCGTLDYLPPEM  
DALSYCHSKKVIHRDIKPENLLGSDGELKIADFGWSVHAP-SSRRTTLCGTLDYLPPEM  
DALIYCHEKKVIHRDIKPENLLGYRGELKIADFGWSVHAP-SLRRRTMCGTLDYLPPEM  
DALIYCHGKKVIHRDIKPENLLGLQGELKIADFGWSVHAP-SLRRKTMCGTLDYLPPEM  
DALTYCHEKKVIHRDIKPENLLGFRGEVKIADFGWSVHTP-SLRRRTMCGTLDYLPPEM  
DALTYCHEKKVIHRDIKPENLLGFRGEVKIADFGWSVHTP-SLRRKTMCGTLDYLPPEM  
DALIYCHAKKVIHRDIKPENLLGLKGELKIADFGWSVHAP-SLRRKTMCGTLDYLPPEM  
DALIYCHKKKVIHRDIKPENLLMGLRGELKIADFGWSVHAP-SLRRKTMCGTLDYLPPEM  
DALMYCHGKKVIHRDIKPENLLGLKGELKIADFGWSVHAP-SLRRKTMCGTLDYLPPEM  
NALSYCHSKRVIHRDIKPENLLGSAGELKIADFGWSVHAP-SSRRTTLCGTLDYLPPEM  
DALTYCHEKKVIHRDIKPENLLGFRGEVKIADFGWSVHTP-SLRRKTMCGTLDYLPPEM  
DALSYCHSKRVIHRDIKPENLLGSNGELKMADFGWSVHAP-SSRRTTLCGTLDYLPPEM  
NALSYCHSKRVIHRDIKPENLLGSTGELKIADFGWSVHAP-SSRRTTLCGTLDYLPPEM  
HALAYCHENKVIHRDIKPENLLGLRGEVKIADFGWSVHTP-SLRRKTMCGTLDYLPPEM  
RALIYCHGKKVIHRDIKPENLLIGAQELKIADFGWSVHT--FNRRRTMCGTLDYLPPEM  
DALIYCHSKSVIHRDIKPENLLGSNGELKIADFGWSVHAP-SSRRTTLCGTLDYLPPEM  
NALAYLHKKHVIHRDIKPENLLGIDGELKISDFGWSVHAP-SNRRRTTLCGTLDYLPPEM  
NALAYLHKKHVIHRDIKPENLLGIDGELKISDFGWSVHAP-SNRRRTTLCGTLDYLPPEM  
DALTYCHAKKVIHRDIKPENLLGFQGEVKIADFGWSVHTL-SLRRKTMCGTMDYLPPEI  
DALTYCHEKKVIHRDIKPENLLGYRGEVKIADFGWSVHTP-SLRRKTMCGTLDYLPPEM  
SALEYCHSKKVIHRDIKPENLLGMKGELKISDFGWSVHAP-SSRRTTLCGTLDYLPPEM  
DALIYCHRNKVIHRDIKPENLLGLKGEVKIADFGWSVHTP-SLRRKTMCGTLDYLPPEM  
DALTYCHEKKVIHRDIKPENLLGFRGEVKIADFGWSVHTP-SLRRKTMCGTLDYLPPEM  
DALKYCHSKKVIHRDIKPENLLGLLGDGLKIADFGWSVHAP-SSRRTTLCGTMDYLPPEM  
DALRYCHSKKVIHRDIKPENLLVNFKGDLKIADFGWSVHAP-SSRRTTLCGTLDYLPPEM  
DALTYCHENKVIHRDIKPENLLGFRGEVKIADFGWSVHTP-SLRRNTMCGTLDYLPPEM  
NALSYCHSKRVIHRDIKPENLLGSAGELKIADFGWSVHAP-SSRRTTLCGTLDYLPPEM  
DALIYCHGKKVIHRDIKPENLLGLQGELKIADFGWSVHAP-SLRRKTMCGTLDYLPPEM  
SALKYLHRKHVIHRDIKPENLLVGIHGEIKISDFGWSVHAP-NNRRQTLCGTLDYLPPEM  
RALIYCHSKHVIHRDIKPENLLIGAQELKIADFGWSVHT--FNRRRTMCGTLDYLPPEM  
RALIYCHGKKVIHRDIKPENLLVGAQELKIADFGWSVHT--FNRRRTMCGTLDYLPPEM  
RALIYCHGKKVIHRDIKPENLLVGAQELKIADFGWSVHT--FDRRTMCGTLDYLPPEM  
DALMYCHEKKVIHRDIKPENLLGFRGELKIADFGWSVHAP-SLRRRTMCGTLDYLPPEM  
DALNYCHSKKVIHRDIKPENLLGANGELKIADFGWSVHTP-SSRRTTLCGTLDYLPPEM  
DALMYCHEKKVIHRDIKPENLLGYRGELKIADFGWSVHAP-SLRRRTMCGTLDYLPPEM  
DALTYCHGKKVIHRDIKPENLLGFRGEVKIADFGWSVHTL-SLRRKTMCGTLDYLPPEM  
NALLYCHSKRVIHRDIKPENLLGSAGELKIADFGWSVHAP-SSRRTTLCGTLDYLPPEM  
DALRYCHEKKVIHRDIKPENLLGLQGELKIADFGWSVHAP-SLRRKTMCGTLDYLPPEM  
DALSYCHSKRVIHRDIKPENLLGSNGELKIADFGWSVHAP-SSRRTTLCGTLDYLPPEM  
DALSYCHSKRVIHRDIKPENLLGSDGELKIADFGWSVHAP-SSRRTTLCGTLDYLPPEM  
DALMYCHEKKVIHRDIKPENLLGFRGELKIADFGWSVHAP-SLRRRTMCGTLDYLPPEM  
NALSYCHSKRVIHRDIKPENLLGSSGELKIADFGWSVHAP-SSRRTTLCGTLDYLPPEM  
DALTYCHEKKVIHRDIKPENLLGFRGEVKIADFGWSVHTP-SLRRRTMCGTLDYLPPEM  
DALIYCHGKKVIHRDIKPENLLGLQGELKIADFGWSVHAP-SLRRKTMCGTLDYLPPEM  
RALAYCHENKVIHRDIKPENLLGLRGEVKIADFGWSVHTP-SLRRKTMCGTLDYLPPEM  
RALIYLHGKHVIHRDIKPENLLIGSQGELKIADFGWSVHT--FNRRRTMCGTLDYLPPEM  
DALMYCHKKKVIHRDIKPENLLGLQGELKIADFGWSVHAP-SLRRKTMCGTLDYLPPEM  
DALSYCHSKRVIHRDIKPENLLGSAGELKIADFGWSVHAP-SSRRTTLCGTLDYLPPEM  
DALTYCHEKKVIHRDIKPENLLGFKGEVKIADFGWSVHTP-SLRRKTMCGTLDYLPPEM  
DALTYCHEKKVIHRDIKPENLLGFRGEVKIADFGWSVHTP-SLRRKTMCGTLDYLPPEM  
DALIYCHAKKVIHRDIKPENLLMGLKGELKIADFGWSVHAP-SLRRRTMCGTLDYLPPEM  
DALIYCHERKVIHRDIKPENLLGLMGEVKIADFGWSVHTP-SLRRRTTLCGTLDYLPPEM  
DALIYCHAKKVIHRDIKPENLLGLKGDVKIADFGWSVHAP-SSRRTMCGTLDYLPPEM  
RALIYLHGKHVIHRDIKPENLLIGVQELKIADFGWSVHT--FNRRRTMCGTLDYLPPEM  
DALSYCHSKRVIHRDIKPENLLGSAGELKIADFGWSVHAP-SSRRTTLCGTLDYLPPEM  
DALIYCHGKKVIHRDIKPENLLGLQGELKIADFGWSVHAP-SLRRKTMCGTLDYLPPEM  
DALIYCHGKKVIHRDIKPENLLGLQGELKIADFGWSVHAP-SLRRKTMCGTLDYLPPEM  
NALAYCHSKRVIHRDIKPENLLGSAGELKIADFGWSVHAP-SSRRTTLCGTLDYLPPEM  
NALSYCHSKRVIHRDIKPENLLGSSGELKIADFGWSVHAP-SSRRTTLCGTLDYLPPEM

gi|470261727|ref|XP\_004360485.1|/1-457  
gi|449486478|ref|XP\_002195961.2|/1-319  
gi|426243291|ref|XP\_004015492.1|/1-303  
gi|426237569|ref|XP\_004012730.1|/1-344  
gi|410979749|ref|XP\_003996244.1|/1-344  
gi|410953494|ref|XP\_003983405.1|/1-405  
gi|410914403|ref|XP\_003970677.1|/1-332  
gi|389641901|ref|XP\_003718583.1|/1-397  
gi|389635857|ref|XP\_003715581.1|/1-400  
gi|357126095|ref|XP\_003564724.1|/1-291  
gi|355703962|gb|EHH30453.1|/1-309  
gi|350538969|ref|INP\_001233545.1|/1-403  
gi|347966592|ref|XP\_321274.5|/1-404  
gi|345800233|ref|XP\_849906.2|/1-344  
gi|344296517|ref|XP\_003419953.1|/1-405  
gi|344290468|ref|XP\_003416960.1|/1-345  
gi|344269722|ref|XP\_003406697.1|/1-306  
gi|338709975|ref|XP\_001502047.3|/1-304  
gi|334312551|ref|XP\_001378079.2|/1-402  
gi|332848444|ref|XP\_511856.3|/1-344  
gi|330793523|ref|XP\_003284833.1|/1-359  
gi|321461440|gb|EFX72472.1|/1-304  
gi|308497987|ref|XP\_003111180.1|/1-306  
gi|302801442|ref|XP\_002982477.1|/1-288  
gi|302688103|ref|XP\_003033731.1|/1-328  
gi|297802712|ref|XP\_002869240.1|/1-290  
gi|281427796|ref|INP\_001164000.1|/1-322  
gi|268565413|ref|XP\_002639437.1|/1-302  
gi|260784959|ref|XP\_002587531.1|/1-282  
gi|226499040|ref|INP\_001148791.1|/1-296  
gi|224088986|ref|XP\_002308590.1|/1-293  
gi|215983064|ref|INP\_001135979.1|/1-405  
gi|213404608|ref|XP\_002173076.1|/1-346  
gi|198430178|ref|XP\_002119314.1|/1-305  
gi|196012778|ref|XP\_002116251.1|/1-270  
gi|168044897|ref|XP\_001774916.1|/1-297  
gi|159468203|ref|XP\_001692272.1|/1-292  
gi|158297402|ref|XP\_317640.3|/1-307  
gi|156368106|ref|XP\_001627537.1|/1-314  
gi|149734120|ref|XP\_001489320.1|/1-404  
gi|149724949|ref|XP\_001504864.1|/1-344  
gi|148225464|ref|INP\_001085657.1|/1-368  
gi|146172296|ref|XP\_001018388.2|/1-360  
gi|144226857|ref|INP\_001016859.2|/1-360  
gi|125524746|gb|EAY72860.1|/1-292  
gi|115749607|ref|INP\_898907.2|/1-344  
gi|115455545|ref|INP\_001051373.1|/1-309  
gi|115435032|ref|INP\_001042274.1|/1-292  
gi|84000031|ref|INP\_001033117.1|/1-402  
gi|83776600|ref|INP\_004208.2|/1-344  
gi|76253851|ref|INP\_695208.2|/1-397  
gi|68013217|ref|INP\_001018849.1|/1-355  
gi|66815573|ref|XP\_641803.1|/1-384  
gi|62865639|ref|INP\_001015878.1|/1-309  
gi|62857967|ref|INP\_001016570.1|/1-415  
gi|57525577|ref|INP\_001003640.1|/1-405  
gi|50759065|ref|XP\_425725.1|/1-409  
gi|50303387|ref|XP\_451635.1|/1-361  
gi|46358064|ref|INP\_035627.1|/1-417  
gi|45198420|ref|INP\_985449.1|/1-367  
gi|38327570|ref|INP\_940838.1|/1-403  
gi|17505246|ref|INP\_491714.1|/1-305  
gi|17137514|ref|INP\_477336.1|/1-329  
gi|17136516|ref|INP\_476749.1|/1-411  
gi|16758580|ref|INP\_446201.1|/1-343  
gi|15233958|ref|INP\_195009.1|/1-294  
gi|15225495|ref|INP\_182073.1|/1-288  
gi|6708213|gb|AAF25838.1|/1-282  
gi|6325047|ref|INP\_015115.1|/1-367  
gi|2979623|gb|AAC12683.1|/1-345

DALRYCHSKHVIHRDIKPENLLIGINGEIKIADFGWSVHAP-NSKRQTYCGTVEYLPPEI  
DALSYCHSKRVIHRDIKPENLLGSGNELKIADFGWSVHAP-SSRRTTLCGTLDYLPPEM  
DALIYCHEKKVIHRDIKPENLLGLMGVVKIADFGWSVHTP-SLRRRTTCGTLDYLPPEM  
DALTYCHAKKVIHRDIKPENLLGLRGELKIADFGWSVHAP-SLRRKTMCGTLDYLPPEM  
DALLYCHGKKVIHRDIKPENLLGLQGELKIADFGWSVHAP-SLRRKTMCGTLDYLPPEM  
DALSYCHSKRVIHRDIKPENLLGSGAGELKIADFGWSVHAP-SSRRTTLCGTLDYLPPEM  
DALLYCHERKVIHRDIKPENLLGYRGELKIADFGWSVHAP-SLRRRTMCGTLDYLPPEM  
SALKYLHRKHVIHRDIKPENLLVGLHGELKISDFGWSVHAP-NNRRKTLCGTLDYLPPEM  
SALRYLHRKHVMHRDIKPENILVGFYGEIKISDFGWSVHAP-SDRRRTFCGTLDYLPPEM  
RALIYLGHKHVIHRDIKPENLLIGVQGELKIADFGWSVHT--FNRRRTMCGTLDYLPPEM  
DALTYCHEKKVIHRDIKPENLLGFRGEVKIADFGWSVHTP-SLRRKTMCGTLDYLPPEM  
NALSYCHSKRVIHRDIKPENLLGSGAGELKIADFGWSVHAP-SSRRTTLCGTLDYLPPEM  
SALIYLRHNVVIHRDIKPENLLGHGGELKIADFGWSVHEP-TSSRTTLCGTLDYLPPEM  
DALMYCHGKKVIHRDIKPENLLGLQGELKIADFGWSVHAP-SLRRKTMCGTLDYLPPEM  
DALSYCHSKKVIHRDIKPENLLGSTGELKIADFGWSVHAP-SSRRTTLCGTLDYLPPEM  
DALMYCHGKKVIHRDIKPENLLGLRGELKIADFGWSVHAP-SLRRKTMCGTLDYLPPEM  
DALIYCHEKKVIHRDIKPENLLGLRGEVKIADFGWSVHTL-SLRRKTMCGTLDYLPPEM  
DALTYCHEKKVIHRDIKPENLLGFRGEVKIADFGWSVHTP-SLRRKTMCGTLDYLPPEM  
DALSYCHSKKVIHRDIKPENLLGSGDELKIADFGWSVHAP-SSRRTTLCGTLDYLPPEM  
DALMYCHGKKVIHRDIKPENLLGLKGELKIADFGWSVHAP-SLRRKTMCGTLDYLPPEM  
DALRYCHSKHVIHRDIKPENLLIGINGEIKIADFGWSVHAP-NTKRNTFCGTLEYLPPEV  
DALMYCHARKVIHRDIKPENLLGIRGEIKIADFGWSVHAP-SSRRTTLCGTLDYLPPEM  
DALQYCHHKKVIHRDIKPENLLIGPQGELKIGDFGWSVHAP-SNKRQTMCGTMDYLPPEM  
RALMYCHEKHVIHRDIKPENLLIGMKGELKIADFGWSVHT--FNRRRTMCGTLDYLPPEM  
DALTYLHGKHVIHRDIKPENLLLIGINGELKIGDFGWSVHAP-SNRRKTMCGTLDYLPPEM  
RALIYCHGKHVIHRDIKPENLLIGAQGELKIADFGWSVHT--FNRRRTMCGTLDYLPPEM  
DALSYCHTKKVIHRDIKPENLLCAQGGIKIADFGWSVHAP-SSRRTTLCGTLDYLPPEM  
DALSYCHRNKVIHRDIKPENLLIGAQGELKIGDFGWSVHAP-SNKRQTMCGTMDYLPPEM  
DALKYCHSKKVIHRDIKPENLLGLKGDLKIADFGWSVHAP-SSRRATLCGTLDYLPPEM  
RALIYLGHKHVIHRDIKPENLLVGQGEIKIADFGWSVHT--FNRRRTMCGTLDYLPPEM  
RALIYCHGKHVIHRDIKPENLLIGAQGELKIADFGWSVHT--FNRRRTMCGTLDYLPPEM  
NALSYCHSKRVIHRDIKPENLLGSGAGELKIADFGWSVHAP-SSRRTTLCGTLDYLPPEM  
QALAYLHKKHVIHRDIKPENLLGIDGEIKLSDFGWSVHAP-SNRRRTLCGTLDYLPPEM  
DALNYCHSKQVIHRDIKPENLLMGLRGELKIADFGWSVHAP-SSKRQTLCGTLDYLPPEM  
DALRYCHTKKVIHRDIKPENLLGIGKDLKIADFGWSVHAP-SSRRTTLCGTLDYLPPEM  
RALMYCHEKHVIHRDIKPENLLIGLKGELKIADFGWSVHT--CNRRRTLCGTLDYLPPEM  
RALHYCHTKHVIHRDVKPENLLVGLNGELKISDFGWSVHAP-SNRRKTLCGTLDYLPPEM  
DALNYCHANNVIHRDLKPENILLTDENIKLADFGWSAHTN-SNKRKTMCGTLDYLPPEM  
DALAYCHSKKVIHRDIKPENLLNLYKGDIKIADFGWSVHAP-SSRRTTLCGTLDYLPPEM  
NALAYCHSKRVIHRDIKPENLLGSGAGELKIADFGWSVHAP-SSRRTTLCGTLDYLPPEM  
DALMYCHGKKVIHRDIKPENLLGLQGELKIADFGWSVHAP-SLRRKTMCGTLDYLPPEM  
DALQYCHERKVIHRDIKPENLLMGYKGELKIADFGWSVHAP-SLRRRTMCGTLDYLPPEM  
EALIYLSHKDIIHRDIKPEN-LLNSFGTIKIADFGWSIHSP-SNKRQITCGTLDYLPPEM  
DALQYCHERKVIHRDIKPENLLMGYKGELKIADFGWSVHAP-SLRRRTMCGTLDYLPPEM  
RALIYLGHKHVIHRDIKPENLLIGSQGELKIADFGWSVHT--FNRRRTMCGTLDYLPPEM  
DALTYCHANNVIHRDIKPENLLGLRGELKIADFGWSVHAP-SLRRKTMCGTLDYLPPEM  
GALAYCHKKQVIHRDIKPENLLLDIEGRLKIADFGWAVRS--NAKRHTLCGTIDYLPPEM  
HALIYLGHKHVIHRDIKPENLLIGSQGELKIADFGWSVHT--FNRRRTMCGTLDYLPPEM  
NALSYCHSKRVIHRDIKPENLLGSGAGELKIADFGWSVHAP-SSRRTTLCGTLDYLPPEM  
DALMYCHGKKVIHRDIKPENLLGLKGELKIADFGWSVHAP-SLRRKTMCGTLDYLPPEM  
NALSYCHSKRVIHRDIKPENLLGSGNELKIADFGWSVHAP-SSRRTTLCGTLDYLPPEM  
NALSYLHKKHVIHRDIKPENILLGIDGEIKLSDFGWSVHAP-SNRRRTLCGTLDYLPPEM  
DALRYCHSKHVIHRDIKPENLLIGVGGEIKIADFGWSVHAP-NTKRSTFCGTLEYLPPEV  
DALTYCHDKKVIHRDIKPENLLGFRGEVKIADFGWSVHTP-SLRRKTMCGTLDYLPPEM  
EALLYCHSKNVIHRDIKPENLLLGANGELKIADFGWSVHAP-SSRRTTLCGTLDYLPPEM  
DALRYCHSKAVIHRDIKPENLLLGANGELKIADFGWSVHTP-SSRRSTLCGTLDYLPPEM  
DALSYCHSKSVIHRDIKPENLLGSGNELKIADFGWSVHAP-SSRRSTLCGTLDYLPPEM  
NALDYMHSKNILHRDIKPENILIGFNNTIKLTDGFSVYNEDGQKRKTLCGTIDYLSPEL  
NALSYCHSKRVIHRDIKPENLLGSGNELKIADFGWSVHAP-SSRRTMCGTLDYLPPEM  
DALDYMHERNIIHRDIKPENIIGFNNTIKLTDGFSVITPKGSKRKTLCGTVDYLSPEL  
NALSYCHSKRVIHRDIKPENLLGSGAGELKIADFGWSVHAP-SSRRTTLCGTLDYLPPEM  
DALSYCHRNKVIHRDIKPENLLIGSQGELKIGDFGWSVHAP-SNKRQTMCGTMDYLPPEM  
NALNYCHLNNVIHRDLKPENILLTSTDCLKIADFGWSAHTP-NNKRRTLCGTLDYLPPEM  
SALLYLHERKDIHRDIKPENLLLGHKGVLKIADFGWSVHEP-NSMRMTLCGTLDYLPPEM  
DALMYCHKKKVIHRDIKPENLLGLQGELKIADFGWSVHAP-SLRRKTMCGTLDYLPPEM  
RALIYCHGKHVIHRDIKPENLLIGAQGELKIADFGWSVHT--FNRRRTMCGTLDYLPPEM  
QALAYCHGKCVIHRDIKPENLLDHEGRLKIADFGWSVQS--SNKRKTMCGTLDYLPPEM  
DALTYCHERKDIHRDIKPENLLLGNGEVKISDFGWSVHTP-SLRRKTMCGTLDYLPPEM  
NALDYMHSKNIIHRDIKPENILIGFNNTIKLTDGFSIINPPENRRKTMCGTIDYLSPEM  
DALTYCHKKKVIHRDIKPENLLGLQGELKIADFGWSVHAP-SLRRKTMCGTLDYLPPEM



\*\*\* \* . :\*:\*\*\*.\*\*\* :. . :\*: \*\*\*. \* \* \*\*:\*\*.\*:

XP\_020952967.1/1-297  
XP\_012380002.1/1-290  
XP\_006102660.1/1-339  
XP\_005673091.1/1-402  
XP\_004484680.1/1-405  
XP\_004462482.1/1-349  
Q6NW76.1/1-320  
NP\_999084.2/1-344  
gi|1190438012|ref|XP\_020822491.1|/1-365  
gi|1190373986|ref|XP\_020837071.1|/1-405  
gi|1154067554|ref|NP\_001153906.2|/1-332  
gi|1131237831|ref|XP\_019799799.1|/1-344  
gi|1131178530|ref|XP\_019784431.1|/1-296  
gi|1126479796|ref|XP\_006940862.2|/1-308  
gi|1113784803|ref|XP\_019353949.1|/1-376  
gi|1022987698|ref|XP\_016286291.1|/1-365  
gi|1966994491|ref|XP\_014974040.1|/1-344  
gi|1966965902|ref|XP\_015004225.1|/1-398  
gi|1955535802|ref|XP\_004439167.2|/1-335  
gi|1951053762|ref|XP\_014465099.1|/1-416  
gi|1946796851|ref|XP\_014384184.1|/1-404  
gi|1946756071|ref|XP\_014392719.1|/1-299  
gi|1922383691|ref|XP\_013462066.1|/1-300  
gi|1909794683|ref|XP\_013153467.1|/1-419  
gi|1891599507|ref|XP\_013025412.1|/1-351  
gi|1891565640|ref|XP\_013019059.1|/1-351  
gi|1884853217|ref|XP\_013010870.1|/1-315  
gi|1830244266|ref|XP\_012590158.1|/1-296  
gi|1828211890|ref|XP\_012558808.1|/1-339  
gi|1820033943|ref|NP\_012954565.1|/1-282  
gi|1795377289|ref|XP\_011750175.1|/1-471  
gi|1779989227|ref|XP\_011666707.1|/1-321  
gi|1761905244|ref|XP\_011402440.1|/1-385  
gi|1759175630|ref|XP\_011377486.1|/1-303  
gi|1759149200|ref|XP\_011368486.1|/1-311  
gi|1759116391|ref|XP\_011357226.1|/1-339  
gi|1758991346|ref|XP\_0957232.2|/1-420  
gi|1743922878|ref|XP\_011005517.1|/1-293  
gi|1698438703|ref|XP\_009757361.1|/1-296  
gi|1697188794|ref|XP\_009603442.1|/1-294  
gi|1658871623|ref|XP\_008418750.1|/1-330  
gi|1657559162|ref|XP\_008283516.1|/1-424  
gi|1657529148|ref|XP\_008293493.1|/1-319  
gi|1655887082|ref|XP\_008247187.1|/1-292  
gi|1655881324|ref|XP\_008272369.1|/1-402  
gi|1655868725|ref|XP\_008268971.1|/1-343  
gi|1641774253|ref|XP\_008170712.1|/1-431  
gi|1620969612|ref|XP\_007654691.1|/1-303  
gi|1617451788|ref|XP\_007568855.1|/1-331  
gi|1594674988|ref|XP\_007185333.1|/1-402  
gi|1594654199|ref|XP\_007175509.1|/1-282  
gi|1594623572|ref|XP\_007166415.1|/1-344  
gi|1584038001|ref|XP\_006753367.1|/1-368  
gi|1573912300|ref|XP\_006643864.1|/1-292  
gi|1554569173|ref|XP\_005878848.1|/1-339  
gi|1545541126|ref|XP\_005635254.1|/1-405  
gi|1545487136|ref|XP\_005616134.1|/1-307  
gi|1544514002|ref|XP\_005590555.1|/1-471  
gi|1530653727|ref|XP\_005313062.1|/1-365  
gi|1528993703|ref|XP\_005219854.1|/1-303  
gi|1524890835|ref|XP\_005103159.1|/1-332  
gi|1514776534|ref|XP\_004968502.1|/1-292  
gi|1507960369|ref|XP\_004686961.1|/1-405  
gi|1507953708|ref|XP\_004684672.1|/1-344  
gi|1478517838|ref|XP\_0051433159.1|/1-344  
gi|1478512086|ref|XP\_004430306.1|/1-405  
gi|1470628341|ref|XP\_004321082.1|/1-402  
IE----GRTYNEKVDLWCIGVLCYELLVGNPPFESAS--HNETYRRILKVDVRFPPS--LP  
IE----GRTYDEKVDLWCIGVLCYELLMGSPPFESAS--HSETYRRILKVDVRFPPS--MP  
IE----GRTHNEKVDLWCIGVLCYELLVGNPPFESAS--HNETYRRIVKVDLKFPFS--VP  
IE----GRMHDEKVDLWSLGVLCYEFVVGKPPFEANT--YQETYKRISRVEFTFPDF--VP  
IE----GRMHDEKVDLWSLGVLCYEFVVGKPPFEANT--YQETYNRISRVEFTFPDF--VT  
IE----GRTHNEKVDLWCIGVLCYELLVGNPPFESAS--HNETYRRIVKVDLKFPFS--MP  
IE----GHSHDEKVDLWSIGVLCYECLVGNPPFETAS--HAETYKRITKVDLQFPKL--VS  
IE----GRTHNEKVDLWCIGVLCYELLVGNPPFESAS--HNETYRRIVKVDLKFPFS--VP  
IE----GRTHDEKVDLWCIGVLCYELLVGNPPFESSS--HSETYRRITKVDLKFPSS--MP  
IE----GRMHDEKVDLWSLGVLCYEFVVGKPPFEANT--YQETYRSISKVEYKFPDF--VT  
IE----GHTHSEKVDLWCIGVLCYECLVGNPPFETAS--HTDTYKRIMKVDLNFPAKV--VS  
IE----GRTHNEKVDLWCIGVLCYELLVGNPPFESAS--HNETYRRIVKVDLKFPFS--MP  
IE----GRTYNEKVDLWCIGVLCYELLVGNPPFESSS--HNETYRRILKVDVRFPPS--MP  
IE----RRTYNETVDLWCIGVLCYELLVGNPPFESSS--HNETYRRILKVDIRFPFS--IP  
IE----GQPHNEKVDLWCAGVLCYELLVGNPPFESAS--HTETYRRITKVDLRFPPS--MP  
IE----GRTHDEKVDLWCIGVLCYELLVGNPPFESSS--HSETYRRITKVDLKFPSS--MP  
IE----GRTHNEKVDLWCIGVLCYELLVGNPPFESAS--HNETYRRIVKVDLKFPAS--VP  
IE----GRMHDEKVDLWSLGVLCYEFVVGKPPFEANT--YQETYKRISRVEFTFPDF--VT  
IE----GRTYNEKVDLWCIGVLCYELLVGNPPFESSS--HNETYRRILKVDVRFPPS--IP  
IE----GRTHDEKVDLWSLGVLCYEFVVGKPPFEANT--YQETYRCISKVEFRYPPF--LS  
IE----GRMHDEKVDLWSLGVLCYEFVVGKPPFEANT--YQETYKRISRVEFTFPDF--VR  
VE----QRTYSEMDLWCIGVLCYELLVGNPPFESSS--YSETYRRILKVDVRFPPS--IP  
VE----SVEHDSVDLWSLGVLCYEFVVGPPFEAKE--HSDTYRRIQVDLKFPKPIVS  
IE----GRTHDEKVDLWSLGVLCYEFVVGKPPFEANT--YQETYRAISRVEFKFPF--VT  
VE----GKEHTEKVDLWSLGVLTYEIVGAPPFEDVSGHSATYKRIKVDLKIPSF--VS  
VE----GKEHTEKVDLWSLGVLTYEIVGAPPFEDVSGHSATYRRIKVDLKIPSF--VS  
VM----GSTYDEKVDLWCIGVLCYELLVGNPPFESSS--HSETYRRILKVDLRFPPS--MP  
IE----GRTYNEKVDLWCIGVLCYELLVGNPPFESSS--HNETYRRILKVDVRFPPS--VP  
IE----GKVHDEKVDLWSVGVLCYEFVVGKPPFETES--HDHTYQLISSVKYSFPDY--VS  
IE----GKSYNETVDLWCIGVLCYELLVGNPPFESSS--SSETCRRICQVDFRFPSS--MP  
IE----GRTHNEKVDLWCIGVLCYELLVGNPPFESSS--HSETYRRILKVDVRFPPS--MP  
IE----GRMHDDKVDLWSLGVLCYEFVVGKPPFEANT--STETYRRITKVHYQFPYS--VS  
VE----EKVHDEKVDLWSLGVLCYEFVVGKPPFETVN--TQDTYKRIVNVDKFPF--SY-VS  
IE----GRTYNEKVDLWCIGVLCYELLVGNPPFESSS--HSETCRRILKVDVRFPPS--FP  
IE----GRMHDEKVDLWSLGVLCYEFVVGKPPFEANT--YQETYKRISRVEFTFPDF--VP  
IE----GRTHNEKVDLWCIGVLCYELLVGNPPFESAS--HNETYRRIVKVDLKFPFS--VP  
IRSGSKDNWYNEKVDLWSLGVLTYEIVGAPPFEDTP--IMTQKRIARADMTIPEW--VS  
VQ----SVEHDSVDLWSLGVLCYEFVVGIPPEAKE--HSDTYRRIQVDLKFPKPIVS  
VE----SVEHDSVDLWSLGVLCYEFVVGPPFEAKE--HSDTYRRIQVDLKFPKPIVS  
VE----SVEHDANVDLWSLGVLCYEFVVGPPFEAKE--HSDTYRRIQVDLKFPKPIVS  
IE----GHTHSEKVDLWCIGVLCYECLVGNPPFETAS--HSETYKRITKVDLNFPAKV--IS  
IE----GKTHDEKVDLWSLGVLCYEFVVGKPPFEANT--HEETYRRISRVEYTPAQTNIS  
IE----GRTHNEKVDLWCIGVLCYELLVGNPPFETAS--HSETYKRIMKVDLNFPAKV--IS  
IE----GRTYDEKVDLWCIGVLCYELLVGNPPFESSS--HTETYRRILKVDVRFPPS--MS  
IE----GRMHDEKVDLWSLGVLCYEFVVGKPPFEANT--YQETYRRISRVEFTFPDF--VT  
IE----GRTHNEKVDLWCIGVLCYELLVGNPPFESAS--HNETYRRIVKVDLKFPAS--VP  
IE----GRTHDEKVDLWSLGVLCYEFVVGKPPFEANT--YQETYRSISKVEFRFPF--VS  
IE----GRMHDEKVDLWSLGVLCYEFVVGKPPFEANT--YQETYRSISKVEYKFPDF--VT  
IE----GHTHSEKVDLWCIGVLCYECLVGNPPFETAS--HSETYKRITKVDLNFPAKV--IS  
IE----GRMHDEKVDLWSLGVLCYEFVVGKPPFEANT--YQETYKRISRVEFTFPDF--VP  
IE----GRTYNEKVDLWCIGVLCYELLVGNPPFESSS--HNETYRRILKVDVRFPPS--MP  
IE----GRTHNEKVDLWCIGVLCYELLVGNPPFESAS--HNETYRRIVKVDLKFPFS--MP  
IE----QRTYSEMDLWCIGVLCYELLVGNPPFESSS--YSETYRRILKVDVRFPPS--IP  
VE----KTEHNDHVDLWSLGVLCYEFVVGAPPFEAKE--HSETYRRIVKVDLKFPKPFVS  
IE----GRTHNEKVDLWCIGVLCYELLVGNPPFESAS--HNETYRRIVKVDLKFPFS--VP  
IE----GRMHDEKVDLWSLGVLCYEFVVGKPPFEANT--YQETYKRISRVEFTFPDF--VP  
IE----RRTYNEKVDLWCIGVLCYELLVGNPPFESSS--HNETYRRILKVDLRFPPS--LP  
IE----GRTYDEKVDLWCIGVLCYELLVGNPPFESSS--HSETYRRILKVDVRFPPS--MP  
IE----GKTHDEKVDLWCIGVLCYELLVGNPPFESSS--HTETYRRITKVDLQFPF--MS  
IE----GRTYDEKVDLWCIGVLCYELLVGNPPFESAS--TSETYRRILKVDLRFPPS--MS  
VE----GKTHNEKVDLWSLGVLCYEFVVGKPPFEANT--HSETYRRIVKVDLKFPAS--VS  
VE----KTEHDYHVDLWSLGVLCYEFVVGPPFEAKE--HSETYRRIVKVDLKFPKPFVS  
IE----GRMHDEKVDLWSLGVLCYEFVVGKPPFEANT--YQETYKRISRVEFTFPDF--VP  
IE----GRTHNEKVDLWCIGVLCYELLVGNPPFESAS--HNETYRRIVKVDLKFPFS--VP  
IE----GRTHNEKVDLWCIGVLCYELLVGNPPFESAS--HNETYRRIVKVDLKFPAS--VP  
IE----GRMHDEKVDLWSLGVLCYEFVVGKPPFEANT--YQETYKRISRVEFTFPDF--VP  
IE----GRMHDEKVDLWSLGVLCYEFVVGKPPFEANT--YQETYKRISRVEFTFPDF--VP

gi|470261727|ref|XP\_004360485.1|/1-457  
gi|449486478|ref|XP\_002195961.2|/1-319  
gi|426243291|ref|XP\_004015492.1|/1-303  
gi|426237569|ref|XP\_004012730.1|/1-344  
gi|410979749|ref|XP\_003996244.1|/1-344  
gi|410953494|ref|XP\_003983405.1|/1-405  
gi|410914403|ref|XP\_003970677.1|/1-332  
gi|389641901|ref|XP\_003718583.1|/1-397  
gi|389635857|ref|XP\_003715581.1|/1-400  
gi|357126095|ref|XP\_003564724.1|/1-291  
gi|355703962|gb|EHH30453.1|/1-309  
gi|350538969|ref|INP\_001233545.1|/1-403  
gi|347966592|ref|XP\_321274.5|/1-404  
gi|345800233|ref|XP\_849906.2|/1-344  
gi|344296517|ref|XP\_003419953.1|/1-405  
gi|344290468|ref|XP\_003416960.1|/1-345  
gi|344269722|ref|XP\_003406697.1|/1-306  
gi|338709975|ref|XP\_001502047.3|/1-304  
gi|334312551|ref|XP\_001378079.2|/1-402  
gi|332848444|ref|XP\_511856.3|/1-344  
gi|330793523|ref|XP\_003284833.1|/1-359  
gi|321461440|gb|EFX72472.1|/1-304  
gi|308497987|ref|XP\_003111180.1|/1-306  
gi|302801442|ref|XP\_002982477.1|/1-288  
gi|302688103|ref|XP\_003033731.1|/1-328  
gi|297802712|ref|XP\_002869240.1|/1-290  
gi|281427796|ref|INP\_001164000.1|/1-322  
gi|268565413|ref|XP\_002639437.1|/1-302  
gi|260784959|ref|XP\_002587531.1|/1-282  
gi|226499040|ref|INP\_001148791.1|/1-296  
gi|224088986|ref|XP\_002308590.1|/1-293  
gi|215983064|ref|INP\_001135979.1|/1-405  
gi|213404608|ref|XP\_002173076.1|/1-346  
gi|198430178|ref|XP\_002119314.1|/1-305  
gi|196012778|ref|XP\_002116251.1|/1-270  
gi|168044897|ref|XP\_001774916.1|/1-297  
gi|159468203|ref|XP\_001692272.1|/1-292  
gi|158297402|ref|XP\_317640.3|/1-307  
gi|156368106|ref|XP\_001627537.1|/1-314  
gi|149734120|ref|XP\_001489320.1|/1-404  
gi|149724949|ref|XP\_001504864.1|/1-344  
gi|148225464|ref|INP\_001085657.1|/1-368  
gi|146172296|ref|XP\_001018388.2|/1-360  
gi|144226857|ref|INP\_001016859.2|/1-360  
gi|125524746|gb|EAY72860.1|/1-292  
gi|115749607|ref|INP\_898907.2|/1-344  
gi|115455545|ref|INP\_001051373.1|/1-309  
gi|115435032|ref|INP\_001042274.1|/1-292  
gi|84000031|ref|INP\_001033117.1|/1-402  
gi|83776600|ref|INP\_004208.2|/1-344  
gi|76253851|ref|INP\_695208.3|/1-397  
gi|68013217|ref|INP\_001018849.1|/1-355  
gi|66815573|ref|XP\_641803.1|/1-384  
gi|62865639|ref|INP\_001015878.1|/1-309  
gi|62857967|ref|INP\_001016570.1|/1-415  
gi|57525577|ref|INP\_001003640.1|/1-405  
gi|50759065|ref|XP\_425725.1|/1-409  
gi|50303387|ref|XP\_451635.1|/1-361  
gi|46358064|ref|INP\_035627.1|/1-417  
gi|45198420|ref|INP\_985449.1|/1-367  
gi|38327570|ref|INP\_940838.1|/1-403  
gi|17505246|ref|INP\_491714.1|/1-305  
gi|17137514|ref|INP\_477336.1|/1-329  
gi|17136516|ref|INP\_476749.1|/1-411  
gi|16758580|ref|INP\_446201.1|/1-343  
gi|15233958|ref|INP\_195009.1|/1-294  
gi|15225495|ref|INP\_182073.1|/1-288  
gi|6708213|gb|IAAF25838.1|/1-282  
gi|6325047|ref|INP\_015115.1|/1-367  
gi|2979623|gb|IAC12683.1|/1-345

VN----KQHYDHKVDWVSLGILIEFLCGRSAFCDET--EAVMEKIQKGVVTFP--SYVS  
IE----GRTHDEKVDIWSLGVLCYEFVVGKPPFETET--YQETYRAISRVEFKFPPF--VT  
IE----GRTYDEKVDLWLCIGVLCYELLVGNPPPFESAS--TSETYRRILKVDLRFPPS--MS  
IE----GRTHNEKVDLWLCIGVLCYELLVGNPPPFESAS--HNETYRRIVKVDLKFPSPS--VP  
IE----GRTHNEKVDLWLCIGVLCYELLVGNPPPFESAS--HNETYRRIVKVDLKFPSPS--VP  
IE----GRMHDEKVDLWVLCYEFVVGKPPFEAST--YQETYKRISRVEFTFPDF--VP  
IE----GHTHSEKVDLWLCIGVLCYEFVGNPPPFETTS--HSETYKRITKVDLKFPKV--VS  
IKSGNKDNTYDEKVDLWVLCYEFVVGGEAPFEDTP--VMTQRRIRADMTIPSPF--VS  
IKPRTADKSYDHRVDLWVLCYELLVGEAPFEDTP--AMTHKKITRRDMKVPSPF--VS  
VE----KTEHDYHVDIWSLGVLCYEFVYGLPPFEAKE--HSETYRRIVKVDLKFPKPFVS  
IE----GRTYDEKVDLWLCIGVLCYELLVGYPPPFESTS--HSETYRRILKVDVRFPLS--MP  
IE----GRMHDEKVDLWVLCYEFVVGKPPFEANT--YQETYKRISRVEFTFPDF--VT  
VQ----QOPHTKTVDLWVLCYELLVCGKAPFLATT--YEETYRKIMKVQYTVPPD--VT  
IE----GRMHNEKVDLWLCIGVLCYELLVGNPPPFESAS--HNETYRRIVKVDLKFPSPS--VP  
IE----GRMHDEKVDLWVLCYEFVVGKPPFEAST--YQETYNRISRVEFTFPDL--VT  
IE----GRMHNEKVDLWLCIGVLCYELLVGNPPPFESAS--HNETYRRIVKVDLKFPSPS--VP  
IE----GRTYDERVDLWLCIGVLCYELLVGNPPPFESPS--HTETYRRILKVDVRFPS--MP  
IE----GRTYNEKVDLWLCIGVLCYELLVGNPPPFESNS--HNETYRRILKVDVRFPS--IP  
IE----GRMHDEKVDLWVLCYEFVVGKPPFEAET--YQETYRSISKVEYKFPDF--VT  
IE----GRMHDEKVDLWLCIGVLCYELLVGNPPPFESAS--HNETYRRIVKVDLKFPAS--VP  
VE----NKGYDQTDVWVSLGILIEFLVGHSPFASDE--EQRIFFNNIKENEVHP--SAIS  
VE----GRSHDERVDLWVLCYEFVVGSPPFEEK--QDLTYRRICKVDLKFPFAH--LS  
IV----GNHSDAVDLWVLCYEFVVGKPPFEHDK--QADTYSIAIKVARFSPDY--VK  
VE----NKEHDSVDVWVSLGVLCYEFVFGTPPFEAQK--LSDTYRRIVRVDLKFPKIPVIS  
VE----QKEHNERVDLWVLCYEFVIGNPPFEDRDSVNNYRRIASVDLRFPH--MS  
VE----SVEHDSVDIWSLGVLCYEFVYGVPPFEAME--HSDTYRRIVQVDLKFPKPIVS  
VV----GQTHNEKVDLWVLCYEFVVGKPPFEAPT--FEETYRNISKAYYKFPY--VS  
VN----GNSHSDAVDLWVLCYEFVVGKPPFEHEN--QADTYSIAIKAGRFTYPDF--VK  
IE----GKMHDEKVDLWVLCYEFVVGKPPFEAE--HSETYRRIVKVDLRFPPH--VT  
VE----KAEHDYHVDIWSLGVLCYEFVYGVPPFEAKE--HSETYRRIVKVDLKFPKPFVS  
VE----SVEHDSVDIWSLGVLCYEFVYGVPPFEAKE--HSDTYRRIVQVDLKFPKPIVS  
IE----GRMHDEKVDLWVLCYEFVVGKPPFEADT--YQETYRRISRVEFTFPDC--VP  
VE----GKEHGAKVDLWVLCYEFVVGAPPFEDISGHSATYRRIAKVDLKFPSPF--IS  
IE----AKDHADVDLWVLCYEFVVGKPPFETKS--TQETYLRTISLKYSPFPH--VS  
II----GDEHDDKVDLWVLCYEFVVGKPPFETKT--HEDTYKRIKVDLKFPENK--LS  
VE----GKEHDAVDVWVSLGVLCYEFVYGVPPFEAKK--HSDTYKRIVRVDLRFSPKPIVS  
VE----GKEHTTSVDNWSLGVLCYEFVFGGPPFEAPG--HQETYRRIVRVDLKFPDPKPAVS  
VD----GKMYDDSDVQWVLCYEFVVGKPPFESQT--TQTTYDKIRRLDVIYPRH--MT  
IE----GKEHDEKVDLWVLCYEFVVGKPPFEAE--HNETYRRISRVDLRFPSH--VS  
IE----GRMHDEKVDLWVLCYEFVVGKPPFEAST--YQETYKRISRVEFTFPDF--VP  
IE----GRTHNEKVDLWLCIGVLCYELLVGNPPPFESAS--HNETYRRIVKVDLKFPSPS--VP  
IE----GKTHNEKVDLWVLCYEFVVGKPPFESQTS--HSETYRRIVKVDLKFPSPF--LS  
VE----GNTHNYTVDIWSLGVLCYEFVVGKPPFETKS--YDQTYDRIKKVQFSFP--DYLS  
IE----GKTHDEKVDLWVLCYEFVVGKPPFESQTS--HTETYRRIVKVDLKFPSPF--LS  
VE----KTEHDYHVDIWSLGVLCYEFVYGVPPFEAKE--HSETYRRIVKVDLKFPKPFVS  
IE----GRTHNEKVDLWLCIGVLCYELLVGNPPPFESAS--HNETYRRIVKVDLKFPSPS--VP  
IE----KKAHDHVDNWLWVLCYEFVYGVPPFEAAE--QDDTLRRIVKVDLSFPSTPYVS  
VE----KTEHDYHVDIWSLGVLCYEFVYGVPPFEAKE--HSETYRRIVKVDLKFPKPFVS  
IE----GRMHDEKVDLWVLCYEFVVGKPPFEADT--YQETYRRISRVEFTFPDC--VP  
IE----GRMHNEKVDLWLCIGVLCYELLVGNPPPFESAS--HNETYRRIVKVDLKFPAS--VP  
IE----GRMHDEKVDLWVLCYEFVVGKPPFEAHT--YQETYRRISRVEFTFPDF--VT  
VE----GKEHTEKVDLWVLCYEFVVGAPPFEDMSGHSATYKRIKVDLKIPSPF--VP  
IE----KKGYDQTDVWVSLGILIEFLVGRSPFTSDE--EKNIFHNIQENDVYYP--SSIS  
IE----GRTYDEKVDLWLCIGVLCYELLVGYPPPFESAS--HSETYRRILKVDVRFPLS--MP  
IE----GRMHDEKVDLWVLCYEFVVGKPPFETDT--HQETYRRISKVEFYQPSY--VS  
IE----GKTHDEKVDLWVLCYEFVVGKPPFETKS--HEETYRKISRVEFTYPAH--VS  
IE----GRTHDEKVDIWSLGVLCYEFVVGKPPFEAQT--YQETYRAISRVEFKYPLF--VT  
IK----SREYNNKVDVWVLCYELLVVGSPPFEEEDT--KEMTYRRILRCDLKFPNL--VS  
IE----GRMHDEKVDLWVLCYEFVVGKPPFEAHT--YQETYRRISRVEFTFPDF--VT  
IR----SREYNEKVDVWVLCYELLVVGSPPFEEES--KELTYKRILKRNLIFFPDH--VD  
IE----GRMHDEKVDLWVLCYEFVVGKPPFEANT--YQETYKRISRVEFTFPDF--VT  
VN----GADHSDAVDLWVLCYEFVVGKPPFEHED--QSKTYAAIKARFTYPPDS--VK  
VD----GNSYDDSDVQWVLCYEFVVGKPPFESNS--TESTYSKIRMEISYPSH--LS  
VQ----GKPHTKNVDLWVLCYEFVVGKPPFEAHT--YQETYRRIVKVDLKFPSPF--IS  
IE----GRMHNEKVDLWLCIGVLCYELVMGNPPPFESPS--HSETYRRIVKVDLKFPSPS--MP  
VE----SVEHDSVDIWSLGVLCYEFVYGVPPFEAME--HSDTYRRIVQVDLKFPKPIIS  
VE----NRDHDYAVDNWLWVLCYEFVYGVPPFEAES--QKDTFKRILKIDLSFPLTPNVS  
IA----GKPHTKNVDLWVLCYEFVVGKPPFESST--SSETYRRIVQVDFKLPPEH--VP  
VE----SREYDHTIDAWLVLCYEFVVGKPPFEEM--KDTTYKRIAALDIKMPNS--IS  
IE----GRMHNEKVDLWLCIGVLCYELVMGNPPPFESPS--HSETYRRIVKVDLKFPSPS--VP

: : \* \* \* : \* \* . \* \* \*

|                                        |               |                         |
|----------------------------------------|---------------|-------------------------|
| XP_020952967.1/1-297                   | LGAQDLIS----- | RLRYQPSDRLPLDQILEHPWV   |
| XP_012380002.1/1-290                   | PGAQDLIS----- | KLLRYQPSERLPLAQILTHPWV  |
| XP_006102660.1/1-339                   | VGAQDLIS----- | KLLKHNPSDRLPLAQVSAHPWV  |
| XP_005673091.1/1-402                   | EGARDLIS----- | RLKHNPSHRPTLKEVLEHPWI   |
| XP_004484680.1/1-405                   | EGARDLIS----- | RLKHNPSQRPTLKEVLEHPWI   |
| XP_004462482.1/1-349                   | PGAQDLIS----- | KLLKHNPSERLPLAQVAHPWV   |
| Q6NW76.1/1-320                         | EGARDLIS----- | KLLRHSPSMRLPLRSVMEHPWV  |
| NP_999084.2/1-344                      | AGAQDLIS----- | KLLKHNPSDRLPLAQVSAHPWV  |
| gi 1190438012 ref XP_020822491.1/1-365 | SGAQDLIS----- | KLLRHNPSERLPLTQVLAHPWV  |
| gi 1190373986 ref XP_020837071.1/1-405 | EGARDLIS----- | RLKHNPYQRLTLKELLEHPWI   |
| gi 1154067554 ref NP_001153906.2/1-332 | DGARDLIS----- | KLLRHNPNDRLPLQKVMHPWV   |
| gi 1131237831 ref XP_019799799.1/1-344 | AGAQDLIS----- | KLLKHNPSERLPLAQVAHPWV   |
| gi 1131178530 ref XP_019784431.1/1-296 | LGAQDLIS----- | KLLRYQPSERLPLQVLEHPWV   |
| gi 1126479796 ref XP_006940862.2/1-308 | LGARDLIS----- | KLLRYQPLERLPLSQILEHPWV  |
| gi 1113784803 ref XP_019353949.1/1-376 | EGARDLIG----- | KLLRHVPAERLPLRAVLEHPWV  |
| gi 1022987698 ref XP_016286291.1/1-365 | SGAQDLIS----- | KLLRHNPSERLPLTQVLEHPWV  |
| gi 1966994491 ref XP_014974040.1/1-344 | TGAQDLIS----- | KLLRHNPSERLPLAQVSAHPWV  |
| gi 1966965902 ref XP_015004225.1/1-398 | EGARDLIS----- | RLKHNPSQRPMLREVLEHPWI   |
| gi 1955535802 ref XP_004439167.2/1-335 | LGAKDLIS----- | KLLRYQPLERLPLDQIMEHPWV  |
| gi 1951053762 ref XP_014465099.1/1-416 | EGAKDLIS----- | KLLKHNPYHRLPLKDVLEHPWI  |
| gi 1946796851 ref XP_014384184.1/1-404 | EGARDLIS----- | RLLMHNPQRLTLKEVLEHPWI   |
| gi 1946756071 ref XP_014392719.1/1-299 | LGAQDLIS----- | KLLRYQPSERLPLQVLEHPWV   |
| gi 1922383691 ref XP_013462066.1/1-300 | SAAKDLIS----- | QMLVKDSSERLPLHKLEHPWI   |
| gi 1909794683 ref XP_013153467.1/1-419 | EGARDLIA----- | KLLKHNPFHRLPLKDVLLHPWI  |
| gi 1891599507 ref XP_013025412.1/1-351 | PEAKDLIT----- | RLLRHSPEQRISLEQVVKHPWM  |
| gi 1891565640 ref XP_013019059.1/1-351 | PEGKDLIS----- | RLLRHSPEQRISLEQVVKHPWI  |
| gi 1884853217 ref XP_013010870.1/1-315 | AGAQDLIS----- | RLLRFPMERLPLSQVAVHPWV   |
| gi 1830244266 ref XP_012590158.1/1-296 | LGAQDLIS----- | SLLRYQPSERLPLAQILQHPWV  |
| gi 1828211890 ref XP_012558808.1/1-339 | SGARDLIS----- | QLLRKKPSDRLPLADVLKHPWI  |
| gi 1820033943 ref NP_001295465.1/1-282 | AGAQDLIS----- | KLLRHHPSERLSLAQVLKHPWV  |
| gi 1795377289 ref XP_011750175.1/1-471 | LGARDLIS----- | KLLRYQPLERLPLAQILKHPWV  |
| gi 1779989227 ref XP_011666707.1/1-321 | AGARDVIK----- | RLLQHNPANRLPLEQVLAHPWI  |
| gi 1761905244 ref XP_011402440.1/1-385 | PGAKDLII----- | KLLKKNPSERLALDEVLEKHSWI |
| gi 1759175630 ref XP_011377486.1/1-303 | LGAQNLIS----- | KLLRYQPLERLPLAQILQHPWV  |
| gi 1759149200 ref XP_011368486.1/1-311 | EGARDLIS----- | RLKHNPSQRPTLKEVLEHPWI   |
| gi 1759116391 ref XP_011357226.1/1-339 | TGAQDLIS----- | KLLKHNPSERLPLAQVSAHPWV  |
| gi 1758991346 ref XP_957232.2/1-420    | KEAKDLIK----- | KLLVLDPEKRLPLEEVENHPWI  |
| gi 1743922878 ref XP_011005517.1/1-293 | SAAKDLIS----- | QMLVKDSSERLPLHKLEHPWI   |
| gi 1698438703 ref XP_009757361.1/1-296 | SAAKDLIS----- | QMLVKDSSQRLPLKKVLEHPWI  |
| gi 1697188794 ref XP_009603442.1/1-294 | SAARDLIS----- | QMLVKDSSQRLALKKLEHPWI   |
| gi 1658871623 ref XP_008418750.1/1-330 | DGARDLIS----- | KLLRHNPIDRLPLQNVIGHPWV  |
| gi 1657559162 ref XP_008283516.1/1-424 | AGAKDLVA----- | RLKHNPMHRLPIEGVLSPHPW   |
| gi 1657529148 ref XP_008293493.1/1-319 | DGARDLIS----- | KLLRHNPIDRLSLQSVIDHPWV  |
| gi 1655887082 ref XP_008247187.1/1-292 | LGARDLIS----- | RLRYQPSERLPLAQILRHHPWV  |
| gi 1655881324 ref XP_008272369.1/1-402 | EGAKDFIS----- | RLKHNPSHRPTLAEVLEHPWV   |
| gi 1655868725 ref XP_008268971.1/1-343 | AGAQDLIS----- | KLLRHNPSDRLTLAQVSAHPWV  |
| gi 1641774253 ref XP_008170712.1/1-431 | EGAKDLIV----- | KLLKHNPYQRLPLKDVLAHPWI  |
| gi 1620969612 ref XP_007654691.1/1-303 | DGAKDLIS----- | KLLKHNPYQRLTLKEVLEHPWI  |
| gi 1617451788 ref XP_007568855.1/1-331 | DGARDLIS----- | KLLRHNPIDRLPLQNVIDHPWV  |
| gi 1594674988 ref XP_007185333.1/1-402 | EGARDLIS----- | RLKHNPSQRPTLKEVLEHPWI   |
| gi 1594654199 ref XP_007175509.1/1-282 | LGAQDLIS----- | KLLRYQPSERLPLVQILEHPWV  |
| gi 1594623572 ref XP_007166415.1/1-344 | AGAQDLIS----- | KLLKHNPSERLPLAQVSAHPWV  |
| gi 1584038001 ref XP_006753367.1/1-368 | LGAQDLIS----- | KLLRYQPSERLPLAQVLQHPWV  |
| gi 1573912300 ref XP_006643864.1/1-292 | PSAKDLIS----- | QMLVKNSAHLPLHKLEHPWI    |
| gi 1554569173 ref XP_005878848.1/1-339 | VGAQDLIS----- | KLLKHNPSDRLPLAQVSAHPWV  |
| gi 1545541126 ref XP_005635254.1/1-405 | EGARDLIS----- | RLKHNPSQRPTLKEVLEHPWI   |
| gi 1545487136 ref XP_005616134.1/1-307 | LGAQDLVS----- | KLLRYQPLERLPLAQIMEHPWV  |
| gi 1544514002 ref XP_005590555.1/1-471 | LGARDLIS----- | KLLRYQPLERLPLAQILKHPWV  |
| gi 1530653727 ref XP_005313062.1/1-365 | EGSRDLIT----- | KLLCHNPAERLPLRAVLEHPWV  |
| gi 1528993703 ref XP_005219854.1/1-303 | SGARDLIS----- | KLLRFQPLERLPLVRVLEHPWI  |
| gi 1524890835 ref XP_005101959.1/1-332 | DGARDLIS----- | KLLRHDPKARLPLEQVLKHPWI  |
| gi 1514776534 ref XP_004968502.1/1-292 | PAAKDLIS----- | QMLVKNSAHLPLHKVLEHPWI   |
| gi 1507960369 ref XP_004686961.1/1-405 | EGARDFIS----- | RLKHNPSQRPTLKEVLEHPWI   |
| gi 1507953708 ref XP_004684672.1/1-344 | SGAQDLIT----- | KLLKHNPSERLPLTQVSAHPWV  |
| gi 1478517838 ref XP_004433150.1/1-344 | AGAQDLIS----- | KLLKHNPSERLPLAQVSAHPWV  |
| gi 1478512086 ref XP_004430306.1/1-405 | DGARDLIS----- | RLKHNPSQRPTLKEVLEHPWI   |
| gi 1470628341 ref XP_004321082.1/1-402 | EGARDLIS----- | RLKHNPSQRPTLKEVLEHPWI   |

|                                         |                                                            |
|-----------------------------------------|------------------------------------------------------------|
| gi 470261727 ref XP_004360485.1 /1-457  | MEAQHLIL-----GLLTSDPSERLTMYDVINHPWI                        |
| gi 449486478 ref XP_002195961.2 /1-319  | EGARDLIS-----RLLKHNPFHRLPLKDVLLHPWI                        |
| gi 426243291 ref XP_004015492.1 /1-303  | SGARDLIS-----KLLRFQPLERLPLVRVLEHPWI                        |
| gi 426237569 ref XP_004012730.1 /1-344  | MGAQDLIS-----KLLKHNPSERLPLAQVSAHPWV                        |
| gi 410979749 ref XP_003996244.1 /1-344  | TGAQDLIS-----KLLKHNPSERLPLAQVSAHPWV                        |
| gi 410953494 ref XP_003983405.1 /1-405  | EGARDLIS-----RLLKHNPSQRPTLKEVLEHPWV                        |
| gi 410914403 ref XP_003970677.1 /1-332  | DGARDLIS-----KLLRHNPIDRLTLQNVIDHPWV                        |
| gi 389641901 ref XP_003718583.1 /1-397  | PECRDLIK-----KLLVLDPVKRLSLDAVQKHPWI                        |
| gi 389635857 ref XP_003715581.1 /1-400  | REASDLIL-----KLLVVDPNKRLPLDKVLDHPWI                        |
| gi 357126095 ref XP_003564724.1 /1-291  | PAAKDLIS-----QMLVKNSAHLPLNKVLEHPWI                         |
| gi 355703962 gb EHH30453.1 /1-309       | LGARDLIS-----KLLRYQPLERLPLAQILKHPWV                        |
| gi 350538969 ref INP_001233545.1 /1-403 | EGARDLIS-----RLLKHNPSQRPMLREVLEHPWI                        |
| gi 347966592 ref XP_321274.5 /1-404     | KAASHLIS-----RLLVKDPASRMPLENVAIHPWI                        |
| gi 345800233 ref XP_849906.2 /1-344     | TGAQDLIS-----KLLKHNPSERLPLSQVSAHPWV                        |
| gi 344296517 ref XP_003419953.1 /1-405  | VGARDLVS-----RLLKHNPSQRLTLKEVLEHPWI                        |
| gi 344290468 ref XP_003416960.1 /1-345  | TGAQDLIS-----KLLKHNPSERLPLAQVSAHPWV                        |
| gi 344269722 ref XP_003406697.1 /1-306  | SGAQDLIS-----KLLRYQPFERLALAQVLEHPWV                        |
| gi 338709975 ref XP_001502047.3 /1-304  | SGAKDLIS-----KLLRYQPLERLPLDQILEHPWV                        |
| gi 334312551 ref XP_001378079.2 /1-402  | EGARDLIS-----RLLKHNPYQRLTLKELLEHPWI                        |
| gi 332848444 ref XP_511856.3 /1-344     | TGAQDLIS-----KLLRHNPSERLPLAQVSAHPWV                        |
| gi 330793523 ref XP_003284833.1 /1-359  | TDAKDLIS-----KLLISDPHQRLSLDKVINHPWI                        |
| gi 321461440 gb EFX72472.1 /1-304       | TGAKDLIT-----KLLKSRAEDRIPLRKLLEHSWI                        |
| gi 308497987 ref XP_003111180.1 /1-306  | KGARDLIG-----KLLVVDPTKRCTLQKVVDHYWV                        |
| gi 302801442 ref XP_002982477.1 /1-288  | TAAKDLIC-----QLLCKDSSQRLPLKELLAHPWI                        |
| gi 302688103 ref XP_003033731.1 /1-328  | SDARDLIS-----KLLRHDQDRISLAEVMKHPWI                         |
| gi 297802712 ref XP_002869240.1 /1-290  | ASAKDLIS-----QMLVKESSQRLPLHKLLEHPWI                        |
| gi 281427796 ref INP_001164000.1 /1-322 | EGAQDLIR-----KLLVVPNPERLELSQVMKHPWI                        |
| gi 268565413 ref XP_002639437.1 /1-302  | KGARDLIG-----KLLVVDPRRCSLQEVKDYWV                          |
| gi 260784959 ref XP_002587531.1 /1-282  | SGARDLIS-----KLLRHNPMLRLPLDSVL SHPW                        |
| gi 226499040 ref INP_001148791.1 /1-296 | PAAKDLIS-----QMLVKSSAQRLPLHKVLEHPWI                        |
| gi 224088986 ref XP_002308590.1 /1-293  | SAAKDLIS-----QMLVKDSAERLPLHKLLDHPWI                        |
| gi 215983064 ref INP_001135979.1 /1-405 | EGARDLIS-----RLLKHNPSQRPTLKEVLEHPWI                        |
| gi 213404608 ref XP_002173076.1 /1-346  | AEAKDLIS-----RLLQHSPEKRLSLDQVMRHPWI                        |
| gi 198430178 ref XP_002119314.1 /1-305  | EGARDLIR-----RLLKLEPRHRLPLDSVMAHPWI                        |
| gi 196012778 ref XP_002116251.1 /1-270  | PEAMDILR-----KLLCRKPSERLSLDGVM SHPW                        |
| gi 168044897 ref XP_001774916.1 /1-297  | SSARDLIC-----QLLVKDSAQRLPLSKVLTHPW                         |
| gi 159468203 ref XP_001692272.1 /1-292  | DSAKAFIS-----KLLVKDAHRLPLLEVNQDPWI                         |
| gi 158297402 ref XP_317640.3 /1-307     | AGAINLIS-----KLLRIPSSSRLTLRDVMMHPWV                        |
| gi 156368106 ref XP_001627537.1 /1-314  | PGARDLIS-----KLLQHNPNNRLPLKAVLNHPWI                        |
| gi 149734120 ref XP_001489320.1 /1-404  | EGARDLIS-----RLLKHNPSQRPTLKEVLEHPWI                        |
| gi 149724949 ref XP_001504864.1 /1-344  | AGAQDLIS-----KLLRHNPSERLPLAQVSAHPWV                        |
| gi 148225464 ref INP_001085657.1 /1-368 | EGSKDLIS-----KLLRYHPAQLRLPKQVMEHPWV                        |
| gi 146172296 ref XP_001018388.2 /1-360  | IEVRDLIS-----KILVYEKSQRLDLNNILNHPWI                        |
| gi 144226857 ref INP_001016859.2 /1-360 | DGSKDLIS-----KLLRYHPPQRLPLKGVMEHPWV                        |
| gi 125524746 gb EAY72860.1 /1-292       | PAAKDLIS-----QMLVKNSAHLPLHKLLEHPWI                         |
| gi 115749607 ref INP_898907.2 /1-344    | LGADQLIY-----KLLKHNPSERLPLAQVSAHPWV                        |
| gi 115455545 ref INP_001051373.1 /1-309 | ADAKDLICKVFFVLLIPIVYVTLKWWELLSFELVRMQLLVKDSNKRLSLDDIMKHPWI |
| gi 115435032 ref INP_001042274.1 /1-292 | PAAKDLIS-----QMLVKNSAHLPLHKLLEHPWI                         |
| gi 84000031 ref INP_001033117.1 /1-402  | EGARDLIS-----RLLKHNPSQRPTLKEVLEHPWI                        |
| gi 83776600 ref INP_004208.2 /1-344     | MGAQDLIS-----KLLRHNPSERLPLAQVSAHPWV                        |
| gi 76253851 ref INP_695208.2 /1-397     | EGARDLIS-----RLLKHNSSQRLTLAEVLEHPWI                        |
| gi 68013217 ref INP_001018849.1 /1-355  | PDARDLIS-----RLLQHNPEKRMSLEQVMRHPWI                        |
| gi 66815573 ref XP_641803.1 /1-384      | PEAKDLIS-----RLLVSDPHQRLTLKDVINHPWI                        |
| gi 62865639 ref INP_001015878.1 /1-309  | LGARDLIS-----KLLRYQPLERLPLAQILKHPWV                        |
| gi 62857967 ref INP_001016570.1 /1-415  | EGARDLVS-----KLLKHNPNNHRLSLKGVLEHPWI                       |
| gi 57525577 ref INP_001003640.1 /1-405  | NGSRDLIN-----RLLKHNPMHRLPIQGVMEHPWV                        |
| gi 50759065 ref XP_425725.1 /1-409      | EGARDLIS-----KLLKHNPFHRLPLKDVLVHPWI                        |
| gi 50303387 ref XP_451635.1 /1-361      | PQARDLIV-----RLLQFEPSEKRIPLSEVKSHAWI                       |
| gi 46358064 ref INP_035627.1 /1-417     | EGARDLIS-----RLLKHNASQRLTLAEVLEHPWI                        |
| gi 45198420 ref INP_985449.1 /1-367     | TEARHLIS-----RLLEYDPGDRIPLKEVKKHPWI                        |
| gi 38327570 ref INP_940838.1 /1-403     | EGARDLIS-----RLLKHNPSQRPMLREVLEHPWI                        |
| gi 17505246 ref INP_491714.1 /1-305     | KGARDLIG-----RLLVVDPKARCTLQEQVKEYHWI                       |
| gi 17137514 ref INP_477336.1 /1-329     | KGCKELIG-----GLLRKESKGRITLVDVMTHYWV                        |
| gi 17136516 ref INP_476749.1 /1-411     | KAASHLIS-----KLLVLNPQHRLPLDQVMVHPWI                        |
| gi 16758580 ref INP_446201.1 /1-343     | LGAKDLIS-----KLLKHNPQRLPLEQVSAHPWV                         |
| gi 15233958 ref INP_195009.1 /1-294     | ASAKDLIS-----QMLVKESSQRLPLHKLLEHPWI                        |
| gi 15225495 ref INP_182073.1 /1-288     | EEAKNLIS-----QLLVKDPSKRLSIEKIMQHPWI                        |
| gi 6708213 gb IAAF25838.1 /1-282        | AGAQDLIS-----KLLRYHPSERLSLAQVLEHPWV                        |
| gi 6325047 ref INP_015115.1 /1-367      | QDAQDLIL-----KLLKYDPKDRMRLGDVKMHPWI                        |
| gi 2979623 gb IAC12683.1 /1-345         | SGAQDLIS-----KLLKHNPWQRLPLAEVAAHPWV                        |

..

:\* \* : : . \*:

XP\_020952967.1/1-297 RAHSRRVLPPSTQMVS-----  
XP\_012380002.1/1-290 QAHSRRVLPPSAQMVS-----  
XP\_006102660.1/1-339 RAHSRRVLPPSALQSVH-----  
XP\_005673091.1/1-402 TAN-SKPASSH-KKESTSKQP-----  
XP\_004484680.1/1-405 TANSKPPSSQKSKESTIQSS-----  
XP\_004462482.1/1-349 RAHSRRVLPPSALQSV-----  
Q6NW76.1/1-320 KANSRRVLPPVCSSEPH-----  
NP\_999084.2/1-344 RAHSRRVLPPSAPQSV-----  
gi|1190438012|ref|XP\_020822491.1|/1-365 QTHSRRVLPPCSSRPAH-----  
gi|1190373986|ref|XP\_020837071.1|/1-405 IANSSKSPSSRKSKESNSTKS-----  
gi|1154067554|ref|NP\_001153906.2|/1-332 RTNSHRLLPPTCPSKKC-----  
gi|1131237831|ref|XP\_019799799.1|/1-344 RAHSRRVLPPSALQSV-----  
gi|1131178530|ref|XP\_019784431.1|/1-296 RAHSRRVLPPSAQMVS-----  
gi|1126479796|ref|XP\_006940862.2|/1-308 RAHSRRVPPSVQMDS-----  
gi|1113784803|ref|XP\_019353949.1|/1-376 RANSRRVLPPAYAP-----  
gi|1022987698|ref|XP\_016286291.1|/1-365 QTHSRRVLPPCSQPAPAH-----  
gi|966994491|ref|XP\_014974040.1|/1-344 RANSRRVLPPSALQSV-----  
gi|966965902|ref|XP\_015004225.1|/1-398 TANSKPSNCQ-NRVN-----  
gi|955535802|ref|XP\_004439167.2|/1-335 RAHSRRVLPPSAQMAS-----  
gi|951053762|ref|XP\_014465099.1|/1-416 RENSTKSPASRVSEAAGSRKSEANNKT-  
gi|946796851|ref|XP\_014384184.1|/1-404 TANSKPPSSQKSKESTSKQS-----  
gi|946756071|ref|XP\_014392719.1|/1-299 QAHSRRVGGPPAPAS-----  
gi|922383691|ref|XP\_013462066.1|/1-300 VQNAEPSGIYRS-----  
gi|909794683|ref|XP\_013153467.1|/1-419 TANSTKMPNSRKSDVAALPRTQS-----  
gi|891599507|ref|XP\_013025412.1|/1-351 LKHKASWSDQ-----  
gi|891565640|ref|XP\_013019059.1|/1-351 LKFASWNSDQ-----  
gi|884853217|ref|XP\_013010870.1|/1-315 KAHSRRVLPP-----  
gi|830244266|ref|XP\_012590158.1|/1-296 RMHSRRVLPPSAQVAS-----  
gi|828211890|ref|XP\_012558808.1|/1-339 QQHSSMFNKQKQSVNQPTTSSVSLSSS  
gi|820033943|ref|NP\_001295465.1|/1-282 RKHSQRMLPPCAQMAS-----  
gi|795377289|ref|XP\_011750175.1|/1-471 QVHSRRVLPPCAQMAS-----  
gi|779989227|ref|XP\_011666707.1|/1-321 VENSKKKPSSTSSSESQS-----  
gi|761905244|ref|XP\_011402440.1|/1-385 IENAK-----  
gi|759175630|ref|XP\_011377486.1|/1-303 QAHSRRVLPPSAHMAS-----  
gi|759149200|ref|XP\_011368486.1|/1-311 TANSKPPSSSQNKESSSKQS-----  
gi|759116391|ref|XP\_011357226.1|/1-339 RAHSRRVLPPSALQSV-----  
gi|758991346|ref|XP\_957232.2|/1-420 LKHCVKGERAANREKMASKMGN-----  
gi|743922878|ref|XP\_011005517.1|/1-293 VQNVDPGIFRG-----  
gi|698438703|ref|XP\_009757361.1|/1-296 VQNADPSGVYKG-----  
gi|697188794|ref|XP\_009603442.1|/1-294 VQNADPSGVYRG-----  
gi|658871623|ref|XP\_008418750.1|/1-330 KANSRRFLPPTCLTKKP-----  
gi|657559162|ref|XP\_008283516.1|/1-424 VQNS---TKKPTITLNNEELS-----  
gi|657529148|ref|XP\_008293493.1|/1-319 RSNHRLLPPTCPAKKS-----  
gi|655887082|ref|XP\_008247187.1|/1-292 QAHSRRVLPPCAHPAS-----  
gi|655881324|ref|XP\_008272369.1|/1-402 KAKSSKPPSSCP-DKEPASKQS-----  
gi|655868725|ref|XP\_008268971.1|/1-343 RAHSRRVLPPSALQSV-----  
gi|641774253|ref|XP\_008170712.1|/1-431 TTNSTKQPSRRKSEAATSNRTPS-----  
gi|620969612|ref|XP\_007654691.1|/1-303 TANSKAPNSLKSQESTSTKS-----  
gi|617451788|ref|XP\_007568855.1|/1-331 KANSRRLLPPTCPTKKP-----  
gi|594674988|ref|XP\_007185333.1|/1-402 TAN-SKPSSSQ-KKESASKQS-----  
gi|594654199|ref|XP\_007175509.1|/1-282 RAHSRRVLPPSAQMVS-----  
gi|594623572|ref|XP\_007166415.1|/1-344 RAHSRRVLPPSALQSV-----  
gi|584038001|ref|XP\_006753367.1|/1-368 QAHSRRVEPPPAPSAS-----  
gi|573912300|ref|XP\_006643864.1|/1-292 VQNADPSGVYRG-----  
gi|554569173|ref|XP\_005878848.1|/1-339 RAHSRRVLPPSALQSVH-----  
gi|545541126|ref|XP\_005635254.1|/1-405 MANSKPPSSSQKNKDSTSKQS-----  
gi|545487136|ref|XP\_005616134.1|/1-307 RAHSRRVLPPSVQMAS-----  
gi|544514002|ref|XP\_005590555.1|/1-471 QVHSRRVLPPCAQMAS-----  
gi|530653727|ref|XP\_005313062.1|/1-365 KANSRRVLPPVFNAPAN-----  
gi|528993703|ref|XP\_005219854.1|/1-303 RAHSQRVLPPSVPMAP-----  
gi|524890835|ref|XP\_005101959.1|/1-332 LKYNPDASSSTSSAPSS-----  
gi|514776534|ref|XP\_004968502.1|/1-292 VQNADPSGVYRG-----  
gi|507960369|ref|XP\_004686961.1|/1-405 TANSKPPSSSQKNKESSTSKQS-----  
gi|507953708|ref|XP\_004684672.1|/1-344 RAHSRRVLPPSALQSV-----  
gi|478517838|ref|XP\_004433150.1|/1-344 RAHSRRVLPPSAPQSV-----  
gi|478512086|ref|XP\_004430306.1|/1-405 TANASKPSNSQKSKESTSKQS-----  
gi|470628341|ref|XP\_004321082.1|/1-402 TAN-SKPSSSQ-KKESASKQS-----

|                                        |                               |
|----------------------------------------|-------------------------------|
| gi 470261727 ref XP_004360485.1 /1-457 | KKNAHPHSLIRT-----             |
| gi 449486478 ref XP_002195961.2 /1-319 | TANSTKIPTSRSKSDAAAPSKT-----   |
| gi 426243291 ref XP_004015492.1 /1-303 | RAHSQRVLPPSVQRAF-----         |
| gi 426237569 ref XP_004012730.1 /1-344 | RAHSRRVLPPSAQSV-----          |
| gi 410979749 ref XP_003996244.1 /1-344 | RAHSRRVLPPSALQSV-----         |
| gi 410953494 ref XP_003983405.1 /1-405 | TANSSKPSGSKSKESTGKQS-----     |
| gi 410914403 ref XP_003970677.1 /1-332 | RSNSRRVLPPICPAKKS-----        |
| gi 389641901 ref XP_003718583.1 /1-397 | IKHCVKGERATNREKGRGSD-----     |
| gi 389635857 ref XP_003715581.1 /1-400 | VKHCRN-QKASDRLLPSTGNTTPED---  |
| gi 357126095 ref XP_003564724.1 /1-291 | VQNADPSGVYRG-----             |
| gi 355703962 gb EHH30453.1 /1-309      | QVHSRRVLPPCAQMAS-----         |
| gi 350538969 ref NP_001233545.1 /1-403 | TANSSKPSNCQ-NKESASKQS-----    |
| gi 347966592 ref XP_321274.5 /1-404    | QLHVDKK-----                  |
| gi 345800233 ref XP_849906.2 /1-344    | RAHSRRMLPPSAVQAIP-----        |
| gi 344296517 ref XP_003419953.1 /1-405 | TANSKKPPSSQ-NKEPTSKQS-----    |
| gi 344290468 ref XP_003416960.1 /1-345 | RAHSRRVLPPSALQSV-----         |
| gi 344269722 ref XP_003406697.1 /1-306 | QAHSQRVLPPSAQMAS-----         |
| gi 338709975 ref XP_001502047.3 /1-304 | RAHSRRVLPPSAQMAS-----         |
| gi 334312551 ref XP_001378079.2 /1-402 | IANSKSPSSRKSKESKP-----        |
| gi 332848444 ref XP_511856.3 /1-344    | RANSRRVLPPSALQSV-----         |
| gi 330793523 ref XP_003284833.1 /1-359 | QKNAHPHSLPTKLGPLPSQMT-----    |
| gi 321461440 gb EFX72472.1 /1-304      | LQHLSDVRSRLPTFQIMQPNKA-----   |
| gi 308497987 ref XP_003111180.1 /1-306 | TQMVTARKVAEQAQAEKASLRDH---    |
| gi 302801442 ref XP_002982477.1 /1-288 | TANADPSGIYAGSGGASA-----       |
| gi 302688103 ref XP_003033731.1 /1-328 | VKYRPPKGQIRPSQLGM-----        |
| gi 297802712 ref XP_002869240.1 /1-290 | VQNADPSGIYRG-----             |
| gi 281427796 ref NP_001164000.1 /1-322 | VSHTEEKSSQ-----               |
| gi 268565413 ref XP_002639437.1 /1-302 | TSMLDCSRRAAEKQKAERASLRDH---   |
| gi 260784959 ref XP_002587531.1 /1-282 | KDNAATQAESTPAHPHTASHTKS-----  |
| gi 226499040 ref NP_001148791.1 /1-296 | VQNADPSGVYREGRSV-----         |
| gi 224088986 ref XP_002308590.1 /1-293 | VQNADPSGIFRG-----             |
| gi 215983064 ref NP_001135979.1 /1-405 | TAN-SKPSSCQ-KKESTSKQS-----    |
| gi 213404608 ref XP_002173076.1 /1-346 | LKHKNWDRPGVDQP-----           |
| gi 198430178 ref XP_002119314.1 /1-305 | KANA---KVHKFGPDGRPMD-----     |
| gi 196012778 ref XP_002116251.1 /1-270 | VKHVQNDAKN-----               |
| gi 168044897 ref XP_001774916.1 /1-297 | VNNADPSGVYNGHN-----           |
| gi 159468203 ref XP_001692272.1 /1-292 | KANADPDMLARGN-----            |
| gi 158297402 ref XP_317640.3 /1-307    | -----VQMKK-----               |
| gi 156368106 ref XP_001627537.1 /1-314 | RMHATPVLEQKPASQR-----         |
| gi 149734120 ref XP_001489320.1 /1-404 | TANSSKPSNSQKSKESTSKQP-----    |
| gi 149724949 ref XP_001504864.1 /1-344 | RAHSRRVLPPSALQSV-----         |
| gi 148225464 ref NP_001085657.1 /1-368 | KANSRRVLPPVYQSSHPK-----       |
| gi 146172296 ref XP_001018388.2 /1-360 | QKHNPQNQVTSQVPLQQLNQNIC----   |
| gi 144226857 ref NP_001016859.2 /1-360 | KANSRRVLPPVFSQSSK-----        |
| gi 125524746 gb EAY72860.1 /1-292      | VQNADPSGVYRG-----             |
| gi 115749607 ref NP_898907.2 /1-344    | RTHSRRVLPPSAQSV-----          |
| gi 115455545 ref NP_001051373.1 /1-309 | VKNADPSGSCSDQKART-----        |
| gi 115435032 ref NP_001042274.1 /1-292 | VQNADPSGVYRG-----             |
| gi 84000031 ref NP_001033117.1 /1-402  | IAN-SKPSSCQ-KKESTSKQS-----    |
| gi 83776600 ref NP_004208.2 /1-344     | RANSRRVLPPSALQSV-----         |
| gi 76253851 ref NP_695208.2 /1-397     | KANSKPPGTGHNSKEATSKSS-----    |
| gi 68013217 ref NP_001018849.1 /1-355  | VKYKDSWTRKSESS-----           |
| gi 66815573 ref XP_641803.1 /1-384     | KKHAHPKSLEPTKLGPLPSQMTY----   |
| gi 62865639 ref NP_001015878.1 /1-309  | QAHSRRVLPPCAQMAS-----         |
| gi 62857967 ref NP_001016570.1 /1-415  | IDNSAQKPKRKEGPVTGAQ-----      |
| gi 57525577 ref NP_001003640.1 /1-405  | VENS---TKKPTTYTATANN-----     |
| gi 50759065 ref XP_425725.1 /1-409     | TANSTKLNNRK-----              |
| gi 50303387 ref XP_451635.1 /1-361     | ANNRGSWTDL-----               |
| gi 46358064 ref NP_035627.1 /1-417     | KANSKPPGTGHTSKEPTSKSS-----    |
| gi 45198420 ref NP_985449.1 /1-367     | EKNKPFW-----                  |
| gi 38327570 ref NP_940838.1 /1-403     | TANSSKPSNCQ-NKESASKQS-----    |
| gi 17505246 ref NP_491714.1 /1-305     | QGMMEAKIRAEKQKQIEKASLRNH---   |
| gi 17137514 ref NP_477336.1 /1-329     | KAGMAERELQLQKRRERGKENTARN---- |
| gi 17136516 ref NP_476749.1 /1-411     | LAHTQ-----                    |
| gi 16758580 ref NP_446201.1 /1-343     | RANSRRVLPPSAL-----            |
| gi 15233958 ref NP_195009.1 /1-294     | VQNADPSGIYRV-----             |
| gi 15225495 ref NP_182073.1 /1-288     | VKNADPKGVCASTDI-----          |
| gi 16708213 gb AAF25838.1 /1-282       | REHSRRVLPPCVHGAS-----         |
| gi 6325047 ref NP_015115.1 /1-367      | LRNKPFWENKRL-----             |
| gi 2979623 gb AAC12683.1 /1-345        | RANSRRVLPPSAL-----            |
