# Supplementary material for: Differential Selective Pressures Experienced by the Aurora Kinase Gene Family
Source: MDPI journal article supplement (doi:10.3390/ijms19010072), 2017-12-28
Supplement: s1 [file s1]

**Figure S9.** Alignment of placental mammal AKA and AKB sequences. The alignment of the placental mammal AKA and AKB sequences used for the dN/dS analyses.

MATLAB multiple sequence alignment

```

lcl|NM_198436.2 MDRSKENCISGPVKATAPVG-GPKRVLVTQQFPCQNPLPVNSGQAQRVLCPSNSSQRIPL 59
lcl|XM_01514873 MDRSKENCISGPVKAPAVG-GPKRVLVTQQFPCQNPLPANSQAQRVLCPSNSSQVRVPL 59
lcl|NM_00103802 MDRCKENCISGP-KTAVPLSDGPKRVPVAQQFSPQNVPVNSGQAQRVLCPTNSSQVRVPS 59
lcl|NM_00114250 MDRCKENCISGP-KTAVPLSDGPKRVPVAQQFSPQNVPVNSGQAQRVLCPTNSSQVRVPS 59
lcl|XM_00563519 MDKSKENCISGPKVTALGDGPKRVLVTQQFVPSQNPLSANSQAQRVLCPSNSSQVRVPP 60
lcl|XM_00398335 MDKSKENCISGPKVTIPLGDGPKRVPVTQQFVPSQNLLSANSQAQRVLCPSNSSQRIPL 60
lcl|XM_00567303 MDKCKENCISGL-KTTVPVGDGPKRVPVTQHFPQAHLPSANSQAQRVLCPSNSSQRLPL 59
lcl|XM_00148927 MDRSKENCISGPKVTIPLGDGPKRVPVTQQFVPSQNLLSANSQAQRVLCPSNSSQVRVPS 59
lcl|XM_00443024 MDRSKENCISGPKVTIPLGDGPKRVLVTQQFVPSQHPLSANSQAQRVLCPSNSSQVRVPP 60
lcl|XM_00827414 MERSKENCISGPIKAAALLGDGPKRVPVTQRFPSQNVPVNSGQAQRVLCPSNSSQVRVPS 60
lcl|XM_01452869 MDKSKENCISGLVKTIPSGDGPKRVLVTQQFVPSQYPLPANSQAQRVLCPSNSSQVRVPS 60
lcl|XM_00468690 MDKSKENCISGPKVTMPLRDGAKRVPVHQHAPSQSALPASSQAQRVLCPSN-SQRLPL 59
lcl|XM_00341990 MDKSKENCISGPKVTIPLGDGPKRVPVTQFPFSPQNPLSANSQAQRVLCPSNSSQVRVPS 60
lcl|XM_00432103 MDKCKENCISGP-KTTVPLGDGPKRVPVTQQFVPSQNVPVNSGQAQRVLCPSNSSQVRVPS 59
lcl|NM_004217.3 MAQKENS-----YWPWYGRQTAQPSGLSTLPQRLRKEPV 34
lcl|XM_01511855 MAQKENS-----YWPWYGRQTAQPSGLSTLPQRLRKEPV 34
lcl|NM_183084.2 MAQKENS-----YWPWYGRQTAQPSGLSTLPQRLRKEPV 34
lcl|XM_00401268 MAQKENS-----YWPWYGRQTAQPSGLSTLPQRLRKEAV 34
lcl|XM_844813.4 MTQKENS-----YWPWYGRQTAQPSGLSTLPQRLRKEAV 34
lcl|XM_00399619 MAQKENS-----YWPWYGRQTAQPSGLSTLPQRLRKEAV 34
lcl|NM_213919.2 MAQKENS-----YWPWYGRQTAQPSGLSTLPQRLRKEAV 34
lcl|XM_00150481 MTQKENS-----YWPWYGRQTAQPSGLSTLPQRLRKEAV 34
lcl|XM_00443309 MAQKENS-----YWPWYGRQTAQPSGLSTLPQRLRKEAV 34
lcl|XM_00827074 MAQKENS-----YWPWYGRQTAQPSGLSTLPQRLRKEAV 34
lcl|XM_00587878 MTQKENS-----YWPWYGRQTAQPSGLSTLPQRLRKEAV 34
lcl|XM_00468461 MAQKENS-----YWPWYGRQTAQPSGLSTLPQRLRKEAV 34
lcl|XM_00341691 MAQKENS-----YWPWYGRQTAQPSGLSTLPQRLRKEAV 34
lcl|XM_01994424 MAQKENS-----YWPWYGRQTAQPSGLSTLPQRLRKEAV 34
* : :: * . :

lcl|NM_198436.2 QAQKLVSSSH--PVQNLKQKQLQATSVPHVPSRPLNNTQKSKQPLSAPENNPEELASK 117
lcl|XM_01514873 QAQKLVSSSH--LVQNLKQKQLQATSVPHVPSRPPSHTPKSKQPLSAPENNPEELASK 117
lcl|NM_00103802 QAQKLVSISQK--PVQTLKQKPPQAASAPRPVTRPPSNTQKSKQPPAPGNNPEKEVASK 117
lcl|NM_00114250 QAQKLVSISQK--PVQTLKQKPPQAASAPRPVTRPPSNTQKSKQPPAPGNNPEKEVASK 117
lcl|XM_00563519 QTQKLVSSSH--PAQNLKQKQLQATGVPVPSRPLNNTQKSEQPSAPGNNSEKELATK 118
lcl|XM_00398335 QTQKLVSSSH--PVQNLKQKQLQATSVPSRPLNNTQKSEQPLSATGNNSEKELTTK 118
lcl|XM_00567303 HTQKLVSSSH--PVQNLKQKQSQATSGRPVPSRPLSNTQKSEQPPAPGNNPEKEAASK 117
lcl|XM_00148927 QAQKLVSSSH--PVQNLKQKQSQATSVPHVPSRPLNNTQKSEQPLSATGNNSEKELASK 117
lcl|XM_00443024 QAQKLVSSSH--PVQNLKQKQSQATSVPPVPSRPLNNTQKSEQPPAPGNNSEKERTSK 118
lcl|XM_00827414 QAQKLPAEK----PVQKLQAQAASVPRPVSKPPNNTPKSEQPPAPGNNPEKELTSN 116
lcl|XM_01452869 KAQKLVSSSH--PVLNLKQKQLQATSGPCVPSRPLNNTQKSEQPPAPGNNSEKEVASK 118
lcl|XM_00468690 QAQKLVSSSHKAVPNPNLQKQLQANNAPRAAPRLAGTPKSEPP-PSAPGNNSEKEQASK 118
lcl|XM_00341990 QAQKLVSSSH--PVQNLKQKQLQATGVPVPSRPLNNTQKSEQPPAPGNNSEKELASK 118
lcl|XM_00432103 QAQKLVSSSH--SVQPLKQKPTQAASAPRSVPSRPLSNTQKSEQPLSATGNNPEKEAASK 117
lcl|NM_004217.3 TPSALVLSMR-----SNVQPTAAPGQ---KVMENS 61
lcl|XM_01511855 TPSALVLSMR-----SNVQPTAAPGQ---KVVENS 61
lcl|NM_183084.2 TPSALVLSMR-----SNAQPTAAPGQ---KVVENS 61
lcl|XM_00401268 IPSALVLSMR-----SNAQPTAAPGQ---KVVENS 61
lcl|XM_844813.4 TPSALVLSMR-----SNGQPTAAPGQ---KVVENS 61
lcl|XM_00399619 TPSALVLSMR-----SNTQPTAAPGQ---KVVENS 61
lcl|NM_213919.2 TPSALVLSMR-----SNTQPTAAPGQ---KVVENS 61
lcl|XM_00150481 TPSALVLSMR-----SNAQPTVALGQ---KVMENS 61
lcl|XM_00443309 TPSALVLSMR-----SNAQPTAALGQ---KVVENS 61
lcl|XM_00827074 TPSALVLLNR-----SNAPPTAVLGQ---KGMENS 61
lcl|XM_00587878 TPSSLVLSMR-----SNAQPTAAPGQ-----NS 57
lcl|XM_00468461 TPSALVLMNR-----SNTQPTAAPGQ---KVVENS 61
lcl|XM_00341691 TPSALVLSMR-----SNAQPTAAPGE---KMTENS 62
lcl|XM_01994424 TPSALVLSMR-----SNAQPTAALQ---KVVENS 61
. *: : .: . : ..

lcl|NM_198436.2 QKNEESKKRQWALEDFEIGRPLGKGKFGNVYLAREKQSKFIALKVLFAQLEKAGVEHQ 177
lcl|XM_01514873 QKNEESKKRQWALEDFEIGRPLGKGKFGNVYLAREKQSKFIALKVLFAQLEKAGVEHQ 177
lcl|NM_00103802 QKNEESKKRQWALEDFEIGRPLGKGKFGNVYLAREKQSKFIALKVLFAQLEKAGVEHQ 177
lcl|NM_00114250 QKNEESKKRQWALEDFEIGRPLGKGKFGNVYLAREKQSKFIALKVLFAQLEKAGVEHQ 177
lcl|XM_00563519 QKNEESKKRQWALEDFEIGRPLGKGKFGNVYLAREKQSKFIALKVLFAQLEKAGVEHQ 178
lcl|XM_00398335 QKNEESKKRQWALEDFEIGRPLGKGKFGNVYLAREKQSKFIALKVLFAQLEKAGVEHQ 178
lcl|XM_00567303 QKNEESKKRQWALEDFEIGRPLGKGKFGNVYLAREKQSKFIALKVLFTQLEKAGVEHQ 177

```

|                  |                                                               |      |
|------------------|---------------------------------------------------------------|------|
| lcllXM_00148927  | EKNEESKKRQWALDFEIGRPLGKGKGFNVYLAREKQSKFITALKVLFKAQLEKAGVEHQ   | 177  |
| lcllXM_00443024  | EKNEDSKRRQWALDFEIGRPLGKGKGFNVYLAREKQSKFITALKVLFKAQLEKAGVEHQ   | 178  |
| lcllXM_00827412  | QKNEESKKRQWLTLEDFIGRPLGKGKGFNVYLAREKQSKFITALKVLFKAQLEKAGVEHQ  | 176  |
| lcllXM_001452869 | QKNEESKK-QWLTLEDFIGRPLGKGKGFNVYLAREKQSKFITALKVLFKAQLEKAGVEHQ  | 177  |
| lcllXM_00468690  | QKTEESKKRQWALDFEIGRPLGKGKGFNVYLAREKQSKFITALKVLFKAQLEKAGVEHQ   | 178  |
| lcllXM_00341990  | QKNEESKKRQWALDFEIGRPLGKGKGFNVYLAREKQSKFITALKVLFKAQLEKAGVEHQ   | 177  |
| lcllXM_00432103  | QKNEESKKRQWALDFEIGRPLGKGKGFNVYLAREKQSKFITALKVLFKAQLEKAGVEHQ   | 178  |
| lcllNM_004217.3  | SGTPDILTRHFTIDDFEIGRPLGKGKGFNVYLAREKKSHFIVALKVLFKSQIEKEGEVHQ  | 1221 |
| lcllXM_01511855  | SGTPNILMRHFTIDDFEIGRPLGKGKGFNVYLAREKKSHFIVALKVLFKSQIEKEGEVHQ  | 121  |
| lcllNM_183084.2  | SGTPNIPKRSFTIDDFEIGRPLGKGKGFNVYLAREKKSHFIVALKVLFKSQIEKEGEVHQ  | 1221 |
| lcllXM_00401268  | SGTLNIPKRSFTIDDFEIGRPLGKGKGFNVYLAREKKSHFIVALKVLFKSQIEKEGEVHQ  | 121  |
| lcllXM_844813.4  | SGIPNFSMRSFTIDDFEIGRPLGKGKGFNVYLAREKKSHFIVALKVLFKSQIEKEGEVHQ  | 121  |
| lcllXM_00399619  | SGTPNFSMRSFTIDDFEIGRPLGKGKGFNVYLAREKKSHFIVALKVLFKSQIEKEGEVHQ  | 121  |
| lcllNM_213919.2  | SGTPNFSRSFTIDDFEIGRPLGKGKGFNVYLAREKKSHFIVALKVLFKSQIEKEGEVHQ   | 1221 |
| lcllXM_00150481  | SGTPNLLMRSFTIDDFEIGRPLGKGKGFNVYLAREKKSHFIVALKVLFKSQIEKEGEVHQ  | 121  |
| lcllXM_00443309  | SGTPNLLMRSFTIDDFEIGRPLGKGKGFNVYLAREKKSHFIVALKVLFKSQIEKEGEVHQ  | 1221 |
| lcllXM_00827074  | SGAPNF-TRPFTIDDFEIGRPLGKGKGFNVYLAREKKSHFIVALKVLFKSQIEKEGEVHQ  | 120  |
| lcllXM_00587878  | NGTPN-LMRSFTIDDFEIGRPLGKGKGFNVYLAREKKSRLFIVALKVLFKSQIEKEGEVHQ | 116  |
| lcllXM_00468461  | SGTPNLLMRSFTIDDFEIGRPLGKGKGFNVYLAREKKSHFIVALKVLFKSQIEKEGEVHQ  | 1221 |
| lcllXM_00341691  | SGTPNSMLRPFITIDDFEIGRPLGKGKGFNVYLAREKKSHFIVALKVLFKSQIEKEGEVHQ | 1221 |
| lcllXM_01994424  | SRTPNFSMRSFTIDDFEIGRPLGKGKGFNVYLAREKKSHFIVALKVLFKSQIEKEGEVHQ  | 121  |

lcl|XM\_00401268 MEELADALTYCHAKKVIHRDIKPENLLGLRGELKIADFGWSVHAPSLRRKTCMCGTLDYL 240  
lcl|XM\_844813.4 MEELADALMYCHGKKVIHRDIKPENLLGLQGELKIADFGWSVHAPSLRRKTCMCGTLDYL 240  
lcl|XM\_00399619 MEELADALLYCHGKKVIHRDIKPENLLGLQGELKIADFGWSVHAPSLRRKTCMCGTLDYL 240  
lcl|NM\_213919.2 MEELADALIYCHGKKVIHRDIKPENLLGLQGELKIADFGWSVHAPSLRRKTCMCGTLDYL 240  
lcl|XM\_00150481 MEELADALMYCHGKKVIHRDIKPENLLGLQGELKIADFGWSVHAPSLRRKTCMCGTLDYL 240  
lcl|XM\_00443309 MEELADALIYCHGKKVIHRDIKPENLLGLQGELKIADFGWSVHAPSLRRKTCMCGTLDYL 240  
lcl|XM\_00827074 MEELADALRYCHEKKVIHRDIKPENLLGLQGELKIADFGWSVHAPSLRRKTCMCGTLDYL 239  
lcl|XM\_00587878 MEELADALMYCHGKKVIHRDIKPENLLGLQGELKIADFGWSVHAPSLRRKTCMCGTLDYL 235  
lcl|XM\_00468461 MEELADALIYCHGKKVIHRDIKPENLLGLQGELKIADFGWSVHAPSLRRKTCMCGTLDYL 240  
lcl|XM\_00341691 MEELADALMYCHGKKVIHRDIKPENLLGLRGELKIADFGWSVHAPSLRRKTCMCGTLDYL 241  
lcl|XM\_01994424 MEELADALIYCHGKKVIHRDIKPENLLGLQGELKIADFGWSVHAPSLRRKTCMCGTLDYL 240  
: \*\*::\*\* \*\*\* \*:\*\*\*\*\* \*\*\*\*\* \*\*\*:\*\*\*\*\*

lcl|NM\_198436.2 PPEMIEGRMHDEKVDLWSLGVLCYEFVGVKPPFEANTYQETYKRISRVEFTFPDFVTEGA 356  
lcl|XM\_01514873 PPEMIEGRMHDEKVDLWSLGVLCYEFVGVKPPFEANTYQETYKRISRVEFTFPDFVTEGA 356  
lcl|NM\_00103802 PPEMIEGRMHDEKVDLWSLGVLCYEFVGVKPPFEADTYQETYRRISRVEFTFPDCVPEGA 356  
lcl|NM\_00114250 PPEMIEGRMHDEKVDLWSLGVLCYEFVGVKPPFEADTYQETYRRISRVEFTFPDCVPEGA 356  
lcl|XM\_00563519 PPEMIEGRMHDEKVDLWSLGVLCYEFVGVKPPFEASTYQETYKRISRVEFTFPDFVPEGA 357  
lcl|XM\_00398335 PPEMIEGRMHDEKVDLWSLGVLCYEFVGVKPPFEASTYQETYKRISRVEFTFPDFVPEGA 357  
lcl|XM\_00567303 PPEMIEGRMHDEKVDLWSLGVLCYEFVGVKPPFEANTYQETYKRISRVEFTFPDFVPEGA 356  
lcl|XM\_00148927 PPEMIEGRMHDEKVDLWSLGVLCYEFVGVKPPFEASTYQETYKRISRVEFTFPDFVPEGA 356  
lcl|XM\_00443024 PPEMIEGRMHDEKVDLWSLGVLCYEFVGVKPPFEASTYQETYKRISRVEFTFPDFVPDGA 357  
lcl|XM\_00827414 PPEMIEGRMHDEKVDLWSLGVLCYEFVGVKPPFEANTYQETYRRISRVEFTFPDFVTEGA 355  
lcl|XM\_01452869 PPEMIEGRMHDEKVDLWSLGVLCYEFVGVKPPFEASTYQETYKRISRVEFTFPDFVREGA 356  
lcl|XM\_00468690 PPEMIEGRMHDEKVDLWSLGVLCYEFVGVKPPFEASTYQETYKRISRVEFTFPDFVPEGA 357  
lcl|XM\_00341990 PPEMIEGRMHDEKVDLWSLGVLCYEFVGVKPPFEASTYQETYNRISRVEFTFPDLVTVGA 358  
lcl|XM\_00432103 PPEMIEGRMHDEKVDLWSLGVLCYEFVGVKPPFEANTYQETYKRISRVEFTFPDFVPEGA 356  
lcl|NM\_004217.3 PPEMIEGRMHNEKVDLWCIGVLCYELLVGNPPFESASHNETYRRIVKVDLKFPASVPMGA 300  
lcl|XM\_01511855 PPEMIEGRTHNEKVDLWCIGVLCYELLVGNPPFESASHNETYRRIVKVDLKFPASVPTGA 300  
lcl|NM\_183084.2 PPEMIEGRTHNEKVDLWCIGVLCYELLVGNPPFESASHNETYRRIVKVDLKFPSPVPLGA 300  
lcl|XM\_00401268 PPEMIEGRTHNEKVDLWCIGVLCYELLVGNPPFESASHNETYRRIVKVDLKFPSPVPMGA 300  
lcl|XM\_844813.4 PPEMIEGRMHNEKVDLWCIGVLCYELLVGNPPFESASHNETYRRIVKVDLKFPSPVPTGA 300  
lcl|XM\_00399619 PPEMIEGRTHNEKVDLWCIGVLCYELLVGNPPFESASHNETYRRIVKVDLKFPASVPTGA 300  
lcl|NM\_213919.2 PPEMIEGRTHNEKVDLWCIGVLCYELLVGNPPFESASHNETYRRIVKVDLKFPSPVPAGA 300  
lcl|XM\_00150481 PPEMIEGRTHNEKVDLWCIGVLCYELLVGNPPFESASHNETYRRIVKVDLKFPSPVPAGA 300  
lcl|XM\_00443309 PPEMIEGRTHNEKVDLWCIGVLCYELLVGNPPFESASHNETYRRIVKVDLKFPASVPAGA 300  
lcl|XM\_00827074 PPEMIEGRTHNEKVDLWCIGVLCYELLVGNPPFESASHNETYRRIVKVDLKFPASVPAGA 299  
lcl|XM\_00587878 PPEMIEGRTHNEKVDLWCIGVLCYELLVGNPPFESASHNETYRRIVKVDLKFPSPVPAGA 295  
lcl|XM\_00468461 PPEMIEGRTHNEKVDLWCIGVLCYELLVGSPPFESASHNETYRRIVKVDLKFPSPVPSGA 300  
lcl|XM\_00341691 PPEMIEGRMHNEKVDLWCIGVLCYELLVGNPPFESASHNETYRRIVKVDLKFPSPVPTGA 301  
lcl|XM\_01994424 PPEMIEGRTHNEKVDLWCIGVLCYELLVGNPPFESASHNETYRRIVKVDLKIPSPMPAGA 300  
\*\*\*\*\* \*:\*\*\*\*\* .\*\*\*\*\*:\*\*\*:\*\*\*\*\*: ::\*\*\*: \*\* \*::::\* : \*\*

lcl|NM\_198436.2 RDLISRLKHNPSQRPMLEVLHPWITANSKSPSNCQNKESASKQS\*- 404  
lcl|XM\_01514873 RDLISRLKHNPSQRPMLEVLHPWITANSKSPSNCQNRVN\*------ 399  
lcl|NM\_00103802 RDLISRLKHNPSQRPTLKEVLEHPWITANSKSPSSCQKKESTSKQS\*- 403  
lcl|NM\_00114250 RDLISRLKHNPSQRPTLKEVLEHPWITANSKSPSSCQKKESTSKQS\*- 403  
lcl|XM\_00563519 RDLISRLKHNPSQRPTLKDVLEHPWIMANSKSPSSQKNKDSTSKQS\* 406  
lcl|XM\_00398335 RDLISRLKHNPSQRPTLKEVLEHPWITANSKSPSGSQKSKESTGKQS\* 406  
lcl|XM\_00567303 RDLISRLKHNPSHRPTLKEVLEHPWITANSKPASSHKKESTSKQP\*- 403  
lcl|XM\_00148927 RDLISRLKHNPSQRPTLKEVLEHPWITANSKSPSNSQKSKESTSKQP\* 405  
lcl|XM\_00443024 RDLISRLKHNPSQRPTLKEVLEHPWITANSKSPSNSQKSKESTSKQS\* 406  
lcl|XM\_00827414 KDFISRLKHNPSHRPTLAEVLEHPWVKAHSSKSPSSCPDKEPASKQS\*- 403  
lcl|XM\_01452869 RDLISRLLMHNPQRLTLKEVLEHPWITANSKSPSSQKSKESTSKQS\* 405  
lcl|XM\_00468690 RDLISRLKHNPSQRPTLKEVLEHPWITANSKSPSSQKNKESTSKQS\* 406  
lcl|XM\_00341990 RDLVSRLLKHNPSQRLTLKEVLEHPWITANSKPPSSQNKEPTSKQS\*- 406  
lcl|XM\_00432103 RDLISRLKHNPSQRPTLKEVLEHPWITANSKSPSSQKKEASASKQS\*- 403  
lcl|NM\_004217.3 QDLISKLLRHNPSERLPLAQVSAHPWVRANSRRVLPPSALQSV\*- 345  
lcl|XM\_01511855 QDLISKLLRHNPSERLPLAQVSAHPWVRANSRRVLPPSALQSV\*- 345  
lcl|NM\_183084.2 QDLISKLLKHNPSERLPLAQVSAHPWVRTHSRRVLPPSAPQSV\*- 345  
lcl|XM\_00401268 QDLISKLLKHNPSERLPLAQVSAHPWVRANSRRVLPPSAPQSV\*- 345  
lcl|XM\_844813.4 QDLISKLLKHNPSERLPLAQVSAHPWVRANSRRVLPPSAPQSV\*- 345  
lcl|XM\_00399619 QDLISKLLKHNPSERLPLAQVSAHPWVRANSRRVLPPSALQSV\*- 345  
lcl|NM\_213919.2 QDLISKLLKHNPSERLPLAQVSAHPWVRANSRRVLPPSAPQSV\*- 345  
lcl|XM\_00150481 QDLISKLLRHNPSERLPLAQVSAHPWVRANSRRVLPPSALQSV\*- 345  
lcl|XM\_00443309 QDLISKLLKHNPSERLPLAQVSAHPWVRANSRRVLPPSAPQSV\*- 345  
lcl|XM\_00827074 QDLISKLLRHNPSERLPLAQVSAHPWVRANSRRVLPPSAPQSV\*- 344  
lcl|XM\_00587878 QDLISKLLKHNPSERLPLAQVSAHPWVRANSRRVLPPSALQSV\*- 340  
lcl|XM\_00468461 QDLITKLLKHNPSERLPLAQVSAHPWVRANSRRVLPPSALQSV\*- 345  
lcl|XM\_00341691 QDLISKLLKHNPSERLPLAQVSAHPWVRANSRRVLPPSALQSV\*- 346

1c1lXM\_01994424 QDLISKLLKHNPSERLPLAQVAHPWVRAHSRRVLPPSALQSV\*---- 345  
:\*:::\*\* \*\*..\* \*:\* \*\*\*: :::
