# Supplementary material for: Differential Selective Pressures Experienced by the Aurora Kinase Gene Family
Source: MDPI journal article supplement (doi:10.3390/ijms19010072), 2017-12-28
Supplement: s1 [file s1]

**Figure S2.** Alignment of placental mammal AK sequences. The alignment of the placental mammal AKA, AKB, and AKC sequences used for the dN/dS analyses.

MATLAB multiple sequence alignment

```

lcl|NM_198436.2 MDRSKENCISGPVKATAPVG-GPKRVLVTQQFPCQNPLPVNSGQAQRVLCPSNSSQRIPL 59
lcl|XM_01514873 MDRSKENCISGPVKPAAPVG-GPKRVLVTQQFPCQNPLPANSGQAQRVLCPSNSSQRIPL 59
lcl|NM_001038002 MDRCKENCISGP-KTAVPLSDGPKRVPVAQGFPSQNPVSVNSGQAQRVLCPTNSSQRIPL 59
lcl|NM_00114250 MDRCKENCISGP-KTAVPLSDGPKRVPVAQGFPSQNPVSVNSGQAQRVLCPTNSSQRIPL 59
lcl|XM_00563519 MDKSKENCISGPVKTAIALGDGPKRVLVTQQVPSQNPVSVNSGQAQRVLCPSNSSQRIPL 60
lcl|XM_00398335 MDKSKENCISGPVKTTIPLGDGPKRVPVTQGFPSQNPVSVNSGQAQRVLCPSNSSQRIPL 60
lcl|XM_00567303 MDKCKENCISGL-KTTVPPGDGPKRVPVTQHFPAQHLPSANSGQAQRVLCPSNSSQRIPL 59
lcl|XM_00148927 MDRSKENCISGPVKTTVPLGDGPKRVPVTQQLP-QNLLSANSGQAQRVLCPSNSSQRIPL 59
lcl|XM_00443024 MDRSKENCISGPVKTTIPLGDGPKRVLVTQGFPSQNPVSVNSGQAQRVLCPSNSSQRIPL 60
lcl|XM_00827414 MERSKENCISGPVKAALLGDGPKRVPVTQGFPSQNPVSVNSGQAQRVLCPSNSSQRIPL 60
lcl|XM_01452869 MDKSKENCISGLVKTIPSGDGPKRVLVTQGFPSQNPVSVNSGQAQRVLCPSNSSQRIPL 60
lcl|XM_00468690 MDKSKENCISGPVKTMVPLRDGAKRVPVHQHAPSQSALPASSGQAQRVLCPSNSSQRIPL 59
lcl|XM_00341990 MDKSKENCISGPVKTTLPLGDGPKRVPVTQGFPSQNPVSVNSGQAQRVLCPSNSSQRIPL 60
lcl|XM_00432103 MDKCKENCISGP-KTTVPLGDGPKRVPVTQGFPSQNPVSVNSGQAQRVLCPSNSSQRIPL 59
lcl|NM_004217.3 MAQKENSYPWPYGRQTAQSG-----LSTLPQRLRKEPV 34
lcl|XM_01511855 MAQKENAYPWPYGRQTAQSG-----LSTLPQRLRKEPV 34
lcl|NM_183084.2 MAQKENAYPWPYGRQTAQSG-----LNTLPQRLRKEPV 34
lcl|XM_00401268 MAQKENAYPWPYGRQTAQSG-----LNTLPQRLRKEAV 34
lcl|XM_844813.4 MTQKENAYPWPYGRQTTQPG-----LNTLPQRLRKDPA 34
lcl|XM_00399619 MAQKENAYPWPYGRQTTQPG-----LNTLPQRLRKEPA 34
lcl|NM_213919.2 MAQKENTYPWPYGRQTAQSG-----LNTLPQRLRKEAV 34
lcl|XM_00150481 MTQKENAYPWPYGRQTAQSG-----LNTLPQRLRKEPA 34
lcl|XM_00443309 MAQKENAYPWPYGRQTAQSG-----LNTLPQRLRKEPV 34
lcl|XM_00827074 MAQKENAYPWPYSRPTQSG-----LNTLPQRLRKEAA 34
lcl|XM_00587878 MTQKENAYPWPYGRQTAQSG-----LNTLPQRLRKEAV 34
lcl|XM_00468461 MAQKENAYPWPYGRQTAQSG-----LNTLPQRLRKEAV 34
lcl|XM_00341691 MAQKENAYPWPYGRQTAQSG-----LNTLPQRLRKEAV 34
lcl|XM_01994424 MAQKENAYPWPYGRQTAQSG-----LNTLPQRLRKEPV 34
lcl|NM_00101587 MSSPRAVLGKAAQ----- 14
lcl|XM_00109836 MSSPKAAVLGKAAQ----- 14
lcl|XM_00521979 MSHRGTAARKAGGMQ----- 14
lcl|XM_00401544 MSHRGTAARKAGGMQ----- 14
lcl|XM_00561607 MLGSAQPAASEGE----- 13
lcl|XM_00694080 MQSGSVQPAASEEE----- 14
lcl|XM_02109730 MKSGSVQPAASAAA----- 13
lcl|XM_00150199 MSLEAVMKSGSV----- 13
lcl|XM_00443911 MSLEAVMKSGSV----- 13
lcl|XM_00824896 MQS----- 3
lcl|XM_01453723 M-----NPG 4
lcl|XM_01273470 MKS----- 3
lcl|XM_00340664 MFTNVALSFARREW----- 14
lcl|XM_01992887 MKSGSAQPAAVAG----- 13
*

lcl|NM_198436.2 QAKLVSSHK--PVQNLKQKQLQATSVPHVPSRPLNNTQKSKQPLSPAPENNPKEELASK 117
lcl|XM_01514873 QAKLVSSHK--LVQNLKQKQLQATSVPHVPSRPLNNTQKSKQPLSPAPENNPKEELASK 117
lcl|NM_001038002 QAKLVSIQK--PVQTLKQKPPQAASAPRPVTRPPSNTQKSKQPLSPAPENNPKEELASK 117
lcl|NM_00114250 QAKLVSIQK--PVQTLKQKPPQAASAPRPVTRPPSNTQKSKQPLSPAPENNPKEELASK 117
lcl|XM_00563519 QTKLVSSHK--PAQNLKQKQLQATGVRPASPRLNNTQKSEQPLSPAGNNSEKELATK 118
lcl|XM_00398335 QTKLVSSHK--PVQNLKQKQLQATSVPRSVRPLNNTQKSEQPLSATGNNSEKELTTK 118
lcl|XM_00567303 HTQLVSSHK--PVQNLKQKQSQATSGPRVPSRPLNNTQKSEQPLSPAGNNSEKELASK 117
lcl|XM_00148927 QAKLVSSHK--PVQNLKQKQSQATSVPHVPSRPLNNTQKSEQPLSPAGNNSEKELASK 117
lcl|XM_00443024 QAKLVSSHK--PVQNLKQKQSQATSVPPVPSRPLNNTQKSEQPLSPAGNNSEKERTSK 118
lcl|XM_00827414 QAKLLPAEK----PVQNLKQAQAAVPRPVSKPPNNTPKSEQPPSPAGNNSEKELTSN 116
lcl|XM_01452869 QAKLVSSHK--PVLNLKQKQLQATSGPCVPSRPLNNTQKSEQPLSPAGNNSEKELASK 118
lcl|XM_00468690 QAKLVSSHKAVPNPNLQKQQLQANNAPRAAPRPLAGTPKSEPP--PSAPGNNSEKEQASK 118
lcl|XM_00341990 QAKLVSSRK--PVQSQKQKPLQITTVPRVPSRPPNNTPKGEQAQPPASGNNSEKELASK 118
lcl|XM_00432103 QVQKLVSSQK--SVQPLKQKPTQAASAPRSVSRPLNNTQKSEQPLSPAGNNSEKELASK 117
lcl|NM_004217.3 TPSALVMSR-----SNVQPTAAPGQ---KVMENS 61
lcl|XM_01511855 TPSALVMSR-----SNVQPTAAPGQ---KVMENS 61
lcl|NM_183084.2 TPSALVMSR-----SNAQPTAAPGQ---KVMENS 61
lcl|XM_00401268 IPSALVMSR-----SNAQPTAAPGQ---KVMENS 61
lcl|XM_844813.4 TPSALVMSR-----SNGQPTAAPGQ---KVMENS 61
lcl|XM_00399619 TPSALVMSR-----SNTQPTAAPGQ---KVMENS 61
lcl|NM_213919.2 TPSALVMSR-----SNTQPTAAPGQ---KVMENS 61
lcl|XM_00150481 TPSALVMSR-----SNAQPTVALGQ---KVMENS 61
lcl|XM_00443309 TPSALVMSR-----SNAQPTAALGQ---KVMENS 61
lcl|XM_00827074 TPSALVLLNR-----SNAPPTAVLGQ---KGMENS 61
lcl|XM_00587878 TPSSLVMSR-----SNAQPTAAPGQ-----NS 57
lcl|XM_00468461 TPSALVMNR-----SNTQPTAAPGQ---KVMENS 61
lcl|XM_00341691 TPSALVMSR-----SNAQPTAALGQ---KVMENS 62
lcl|XM_01994424 TPSALVMSR-----SNAQPTAALQ---KVMENS 61
lcl|NM_00101587 -----PA-----GEELATANQTA----- 27
lcl|XM_00109836 -----PA-----GEAVTANQTA----- 27
lcl|XM_00521979 -----HAAAAGQ----- 21
lcl|XM_00401544 -----PAAAAGQ----- 21
lcl|XM_00561607 -----K-----TQEQSKDAAGH----- 25
lcl|XM_00694080 -----Q-----TRDQGTAAAGL----- 26
lcl|XM_02109730 -----GQ----- 15
lcl|XM_00150199 -----RPAVPTAGQ----- 22
lcl|XM_00443911 -----QSAGETAGQ----- 22
lcl|XM_00824896 -----GSSQAAG----- 10

```

lcl|XM\_01453723 FLLSIIAEKK-----EPWPSSSPSGS----- 25  
lcl|XM\_01273470 -----GDAQAAGAGG----- 14  
lcl|XM\_00340664 -----KELAPTERAL----- 24  
lcl|XM\_01992887 -----Q----- 14

lcl|NM\_198436.2 QKNEESKKRQWALEDFEIGRPLGKGKFGNVYLAREKQSKFILALKVLFKAQLEKAGVEHQ 177  
lcl|XM\_01514873 QKNEESKKRQWALEDFEIGRPLGKGKFGNVYLAREKQSKFILALKVLFKAQLEKAGVEHQ 177  
lcl|NM\_00103802 QKNEESKKRQWALEDFEIGRPLGKGKFGNVYLAREKQSKFILALKVLFKAQLEKAGVEHQ 177  
lcl|NM\_00114250 QKNEESKKRQWALEDFEIGRPLGKGKFGNVYLAREKQSKFILALKVLFKAQLEKAGVEHQ 177  
lcl|XM\_00563519 QKNEESKKRQWALEDFEIGRPLGKGKFGNVYLAREKQSKFILALKVLFKAQLEKAGVEHQ 178  
lcl|XM\_00398335 QKNEESKKRQWALEDFEIGRPLGKGKFGNVYLAREKQSKFILALKVLFKAQLEKAGVEHQ 178  
lcl|XM\_00567303 QKNEESKKRQWALEDFEIGRPLGKGKFGNVYLAREKQSKFILALKVLFKAQLEKAGVEHQ 177  
lcl|XM\_00148927 EKNEESKKRQWALEDFEIGRPLGKGKFGNVYLAREKQSKFILALKVLFKAQLEKAGVEHQ 177  
lcl|XM\_00443024 EKNEESKKRQWALEDFEIGRPLGKGKFGNVYLAREKQSKFILALKVLFKAQLEKAGVEHQ 178  
lcl|XM\_00827414 QKNEESKKRQWALEDFEIGRPLGKGKFGNVYLAREKQSKFILALKVLFKAQLEKAGVEHQ 176  
lcl|XM\_01452869 QKNEESKK-QWLTLEDFEIGRPLGKGKFGNVYLAREKQSKFILALKVLFKAQLEKAGVEHQ 177  
lcl|XM\_00468690 QKTEESKKRQWALEDFEIGRPLGKGKFGNVYLAREKQSKFILALKVLFKAQLEKAGVEHQ 178  
lcl|XM\_00341990 QKNEESKKRQWALEDFEIGRPLGKGKFGNVYLAREKQSKFILALKVLFKAQLEKAGVEHQ 178  
lcl|XM\_00432103 QKNEESKKRQWALEDFEIGRPLGKGKFGNVYLAREKQSKFILALKVLFKAQLEKAGVEHQ 177  
lcl|NM\_004217.3 SGTDPDLTRHFTIDDFEIGRPLGKGKFGNVYLAREKKSHFIVALVKVLFKSQIEKEGVEHQ 121  
lcl|XM\_01511855 SGTPNILMRHFTIDDFEIGRPLGKGKFGNVYLAREKKSHFIVALVKVLFKSQIEKEGVEHQ 121  
lcl|NM\_183084.2 SGTPNIPKRSFTIDDFEIGRPLGKGKFGNVYLAREKKSHFIVALVKVLFKSQIEKEGVEHQ 121  
lcl|XM\_00401268 SGTNLIPKRSFTIDDFEIGRPLGKGKFGNVYLAREKKSHFIVALVKVLFKSQIEKEGVEHQ 121  
lcl|XM\_844813.4 SGIPNFSMRSFTIDDFEIGRPLGKGKFGNVYLAREKKSHFIVALVKVLFKSQIEKEGVEHQ 121  
lcl|XM\_00399619 SGTPNFSMRSFTIDDFEIGRPLGKGKFGNVYLAREKKSHFIVALVKVLFKSQIEKEGVEHQ 121  
lcl|NM\_213919.2 SGTPNFSTRSFTIDDFEIGRPLGKGKFGNVYLAREKKSHFIVALVKVLFKSQIEKEGVEHQ 121  
lcl|XM\_00150481 SGTPNILMRSFTIDDFEIGRPLGKGKFGNVYLAREKKSHFIVALVKVLFKSQIEKEGVEHQ 121  
lcl|XM\_00443309 SGTPNILMRSFTIDDFEIGRPLGKGKFGNVYLAREKKSHFIVALVKVLFKSQIEKEGVEHQ 121  
lcl|XM\_00827074 SGAPNF-TRPFTIDDFEIGRPLGKGKFGNVYLAREKKSHFIVALVKVLFKSQIEKEGVEHQ 120  
lcl|XM\_00587878 NGTPN-LMRSFTIDDFEIGRPLGKGKFGNVYLAREKKSRFIVALVKVLFKSQIEKEGVEHQ 116  
lcl|XM\_00468461 SGTPNLSMRSFTIDDFEIGRPLGKGKFGNVYLAREKKSHFIVALVKVLFKSQIEKEGVEHQ 121  
lcl|XM\_00341691 SGTPSFLMRPFTIDDFEIGRPLGKGKFGNVYLAREKKSHFIVALVKVLFKSQIEKEGVEHQ 122  
lcl|XM\_01994424 SRTPNFSMRSFTIDDFEIGRPLGKGKFGNVYLAREKKSHFIVALVKVLFKSQIEKEGVEHQ 121  
lcl|NM\_00101587 QQPSSPAMRRLTVDDFEIGRPLGKGKFGNVYLARLKESHFIVALVKVLFKSQIEKEGLEHQ 87  
lcl|XM\_00109836 QQPSSPAMRRLKTDFFEIGRPLGKGKFGNVYLARLKESHFIVALVKVLFKSQIEKEGLEHQ 87  
lcl|XM\_00521979 TVPGAPTARRFTVDDFEIGRPLGKGKFGNVYLARLKKNHFIVALVKVLFKSQIEKEGLEHQ 81  
lcl|XM\_00401544 SVPGAPARRFTIDDFEIGRPLGKGKFGNVYLARLKKNHFIVALVKVLFKSQIEKEGLEHQ 81  
lcl|XM\_00561607 VELSVPPGRRLTIDDFEIGRPLGKGKFGNVYLARLKESHFIVALVKVLFKSQIEKEGLEHQ 85  
lcl|XM\_00694080 VELGMPYVRLTIEDFEIGRPLGKGKFGNVYLARLKESHFIVALVKVIFKSQIEKEGLEHQ 86  
lcl|XM\_02109730 TVSNIPTRGRLTIDDFEIGRPLGKGKFGNVYLARLKESHFIVALVKVLFKSQIEKEGLEHQ 75  
lcl|XM\_00150199 SQPGFPNVRHLTIDDFEIGRPLGKGKFGNVYLARLKESHFIVALVKVLFKSQIEKEGLEHQ 82  
lcl|XM\_00443911 TQPSFPTVRHFTIDDFEIGRPLGKGKFGNVYLARLKESHFIVALVKVLFKSQIEKEGLEHQ 82  
lcl|XM\_00824896 PAQPSVPLRRLTIEDFEIGRPLGKGKFGNVYLARLKDSHFIVALVKVLFKSQIEKEGMEHQ 70  
lcl|XM\_01453723 -----RSLTIDDFDIRCLGKGKFGNVYLARLRDSHFIVALVKVLFKSQIEKEGMEHQ 77  
lcl|XM\_01273470 PALPVATVRRLTIDDFEIGRPLGKGKFGNVYLARLRERFVALVKVLFKSQIEKEGLEHQ 74  
lcl|XM\_00340664 YGDVLLMERRLTIDDFEIGRPLGKGKFGNVYLARLQENHFLVALVKVLFKSQIEKEGLEHQ 84  
lcl|XM\_01992887 TMPSIPTVRRLTIDDFEIGRPLGKGKFGNVYLARLKESHFIVALVKVLFKSQIEKEGLEHQ 74  
::\*: \* \*\*\*\*\* ..\*:\*:\*:\*:\*: \*::\*

lcl|NM\_198436.2 LRREVEIQSHLRHPNILRLYGYFHDATRVYLILEYAPLGTVYRELQKLSKFDEQRTAT-Y 236  
lcl|XM\_01514873 LRREVEIQSHLRHPNILRLYGYFHDATRVYLILEYAPLGTVYRELQKLSKFDEQRTAT-Y 236  
lcl|NM\_00103802 LRREVEIQSHLRHPNILRLYGYFHDATRVYLILEYAPLGAVYRELQKLSKFDEQRTAT-Y 236  
lcl|NM\_00114250 LRREVEIQSHLRHPNILRLYGYFHDATRVYLILEYAPLGAVYRELQKLSKFDEQRTAT-Y 236  
lcl|XM\_00563519 LRREVEIQSHLRHPNILRLYGYFHDATRVYLILEYAPLGAVYRELQKLSKFDEQRTAT-Y 237  
lcl|XM\_00398335 LRREVEIQSHLRHPNILRLYGYFHDATRVYLILEYAPLGAVYRELQKLSKFDEQRTAT-Y 237  
lcl|XM\_00567303 LRREVEIQSHLRHPNILRLYGYFHDATRVYLILEYAPLGAVYRELQKLSKFDEQRTAT-Y 236  
lcl|XM\_00148927 LRREVEIQSHLRHPNILRLYGYFHDATRVYLILEYAPLGAVYRELQKLSKFDEQRTAT-Y 236  
lcl|XM\_00443024 LRREVEIQSHLRHPNILRLYGYFHDATRVYLILEYAPLGAVYRELQKLSKFDEQRTAT-Y 237  
lcl|XM\_00827414 LRREVEIQSHLRHPNILRLYGYFHDATRVYLILEYAPLGTVYRELQKLSKFDEQRTAT-Y 235  
lcl|XM\_01452869 LRREVEIQSHLRHPNILRLYGYFHDATRVYLILEYAPLGTVYRELQKLSRFDEQRTAT-Y 236  
lcl|XM\_00468690 LRREVEIQSHLRHPNILRLYGYFHDATRVYLILEYAPLGAVYRELQKLSKFDEQRTAT-Y 237  
lcl|XM\_00341990 VRREVEIQSHLRHPNILRLYGYFHDATRVYLILEYAPLGTVYRELQKXSKFDEQRTAP\*Y 238  
lcl|XM\_00432103 LRREVEIQSHLRHPNILRLYGYFHDATRVYLILEYAPLGAVYRELQKLSKFDEQRTAT-Y 236  
lcl|NM\_004217.3 LRREIEIQAHLRHPNILRLYNYFYDRRRRIYLILEYAPRGELYKELQKSCFTFDEQRTAT-I 180  
lcl|XM\_01511855 LRREIEIQAHLRHPNILRLYNYFYDRRRRIYLILEYAPRGELYKELQKSRFTFDEQRTAT-I 180  
lcl|NM\_183084.2 LRREIEIQAHLRHPNILRLYNYFYDRRRRIYLILEYAPRGELYKELQKSRFTFDEQRTAT-I 180  
lcl|XM\_00401268 LRREIEIQAHLRHPNILRLYNYFYDRRRRIYLILEYAPRGELYKELQKSRFTFDEQRTAT-I 180  
lcl|XM\_844813.4 LRREIEIQAHLRHPNILRLYNYFYDRRRRIYLILEYAPRGELYKELQKSHFTFDEQRTAT-I 180  
lcl|XM\_00399619 LRREIEIQAHLRHPNILRLYNYFYDRRRRIYLILEYAPRGELYKELQKSRFTFDEQRTAT-I 180  
lcl|NM\_213919.2 LRREIEIQAHLRHPNILRLYNYFYDRRRRIYLILEYAPRGELYKELQKCRFTFDEQRTAT-I 180  
lcl|XM\_00150481 LRREIEIQAHLRHPNILRLYNYFYDRRRRIYLILEYAPRGELYKELQKSRFTFDEQRTAT-I 180  
lcl|XM\_00443309 LRREIEIQAHLRHPNILRLYNYFYDRRRRIYLILEYAPRGELYKELQKSRFTFDEQRTAT-I 180  
lcl|XM\_00827074 LRREIEIQAHLRHPNILRLYNYFYDRRRRIYLILEYAPRGELYKELQKSRFTFDEQRTAT-I 179  
lcl|XM\_00587878 LRREIEIQAHLRHPNILRLYNYFYDRRRRIYLILEYAPRGELYKELQKSRFTFDEQRTAT-I 175  
lcl|XM\_00468461 LRREIEIQAHLRHPNILRLYNYFYDRRRRIYLILEYAPRGELYKELQKSRFTFDEQRTAT-I 180  
lcl|XM\_00341691 LRREIEIQAHLRHPNILRLYNYFYDRRRRIYLILEYAPRGELYKELQKSRFTFDEQRTAT-I 181  
lcl|XM\_01994424 LRREIEIQAHLRHPNILRLYNYFYDRRRRIYLILEYAPRGELYKELQKSHFTFDEQRTAT-I 180  
lcl|NM\_00101587 LRREIEIQAHLRHPNILRLYNYFHDARRVYLILEYAPRGELYKELQKSEKLDEQRTAT-I 146  
lcl|XM\_00109836 LRREIEIQAHLRHPNILRLYNYFHDARRVYLILEYAPRGELYKELQKSEKLDEQRTAT-I 146  
lcl|XM\_00521979 LRREVEIQAHLRHPNILRLYNYFHDARRVYLILEYAPKGLYKALQRSHTFDEQRTAT-I 140  
lcl|XM\_00401544 LRREVEIQAHLRHPNILRLYNYFHDARRVYLILEYAPKGLYKALQRSHTFDEQRTAT-I 140  
lcl|XM\_00561607 LRREIEIQAHLRHPNILRLYNYFHDARRVYLILEYAPRGELYKELQKSHLTDEQHTAT-I 144  
lcl|XM\_00694080 LRREIEIQAHLRHPNILRLYNYFHDARRVYLILEYAPRGELYKELQKSNLTDEQHTAT-I 145  
lcl|XM\_02109730 LRREIEIQAHLRHPNILRLYNYFHDARRVYLILEYAPRGELYKELQKSHLTDEQRTAT-I 134

|                 |                                                          |         |     |
|-----------------|----------------------------------------------------------|---------|-----|
| lclIMM_198436.2 | ITELANALSYCHSKRVIHHRDIKPENLLGSAGELKIADFGWSVHAPSSRRRTL    | CGTLDYL | 296 |
| lclIMM_05154873 | ITELANALSYCHSKRVIHHRDIKPENLLGSAGELKIADFGWSVHAPSSRRRTL    | CGTLDYL | 296 |
| lclIMM_00103802 | ITELANALSYCHSKRVIHHRDIKPENLLGSAGELKIADFGWSVHAPSSRRRTL    | CGTLDYL | 296 |
| lclIMM_00114250 | ITELANALSYCHSKRVIHHRDIKPENLLGSAGELKIADFGWSVHAPSSRRRTL    | CGTLDYL | 296 |
| lclIMM_00563519 | ITELADALSYCHSKRVIHHRDIKPENLLGSAGELKIADFGWSVHAPSSRRRTL    | CGTLDYL | 297 |
| lclIMM_00398335 | ITELADALSYCHSKRVIHHRDIKPENLLGSAGELKIADFGWSVHAPSSRRRTL    | CGTLDYL | 297 |
| lclIMM_00567303 | ITELANALSYCHSKRVIHHRDIKPENLLGSAGELKIADFGWSVHAPSSRRRTL    | CGTLDYL | 296 |
| lclIMM_00148927 | ITELANALAYCHSKRVIHHRDIKPENLLGSAGELKIADFGWSVHAPSSRRRTL    | CGTLDYL | 296 |
| lclIMM_00443024 | ITELANALAYCHSKRVIHHRDIKPENLLGSAGELKIADFGWSVHAPSSRRRTL    | CGTLDYL | 297 |
| lclIMM_00827414 | ITELANALLYCHSKRVIHHRDIKPENLLGSAGELKIADFGWSVHAPSSRRRTL    | CGTLDYL | 295 |
| lclIMM_01452869 | ITELTNALSYCHSKRVIHHRDIKPENLLGSTGELKIADFGWSVHAPSSRRRTL    | CGTLDYL | 296 |
| lclIMM_00468690 | ITELADALSYCHSKRVIHHRDIKPENLLGSAGELKIADFGWSVHAPSSRRRTL    | CGTLDYL | 297 |
| lclIMM_00341990 | ITELADALSYCHSKRVIHHRDIKPENLLGSTGELKIADFGWSVHAPSSRRRTL    | CGTLDYL | 298 |
| lclIMM_00432103 | ITELANALSYCHSKRVIHHRDIKPENLLGSSGELKIADFGWSVHAPSSRRRTL    | CGTLDYL | 296 |
| lclIMM_004217.3 | MEELADALMYCHGGKVHHRDIKPENLLGLGKELKIADFGWSVHAPSLRRKTCGTL  | DYL     | 240 |
| lclIMM_01511855 | MEELADALMYCHGGKVHHRDIKPENLLGLGKELKIADFGWSVHAPSLRRKTCGTL  | DYL     | 240 |
| lclIMM_183084.2 | MEELADALTYCHAKKVHHRDIKPENLLGLRGELKIADFGWSVHAPSLRRKTCGTL  | DYL     | 240 |
| lclIMM_00401268 | MEELADALTYCHAKKVHHRDIKPENLLGLRGELKIADFGWSVHAPSLRRKTCGTL  | DYL     | 240 |
| lclIMM_844813.4 | MEELADALMYCHGGKVHHRDIKPENLLGLGKELKIADFGWSVHAPSLRRKTCGTL  | DYL     | 240 |
| lclIMM_00399619 | MEELADALTYCHGGKVHHRDIKPENLLGLGQELKIADFGWSVHAPSLRRKTCGTL  | DYL     | 240 |
| lclIMM_213919.2 | MEELADALTYCHGGKVHHRDIKPENLLGLGQELKIADFGWSVHAPSLRRKTCGTL  | DYL     | 240 |
| lclIMM_00150481 | MEELADALMYCHGGKVHHRDIKPENLLGLGQELKIADFGWSVHAPSLRRKTCGTL  | DYL     | 240 |
| lclIMM_00443309 | MEELADALTYCHGGKVHHRDIKPENLLGLGQELKIADFGWSVHAPSLRRKTCGTL  | DYL     | 240 |
| lclIMM_00827074 | MEELADALTYCHEKKVHHRDIKPENLLGLGQELKIADFGWSVHAPSLRRKTCGTL  | DYL     | 239 |
| lclIMM_00587878 | MEELADALMYCHKKKVHHRDIKPENLLGLGQELKIADFGWSVHAPSLRRKTCGTL  | DYL     | 235 |
| lclIMM_00468461 | MEELADALTYCHGGKVHHRDIKPENLLGLGQELKIADFGWSVHAPSLRRKTCGTL  | DYL     | 240 |
| lclIMM_00341691 | MEELADALMYCHGGKVHHRDIKPENLLGLRGELKIADFGWSVHAPSLRRKTCGTL  | DYL     | 241 |
| lclIMM_01994424 | MEELADALTYCHGGKVHHRDIKPENLLGLRGELKIADFGWSVHAPSLRRKTCGTL  | DYL     | 240 |
| lclIMM_00101587 | IEELADALTYCHDDKVHHRDIKPENLLGFRGEVKIADFGWSVHTPSLRRKTCGTL  | DYL     | 206 |
| lclIMM_00109836 | IEELADALTYCHEKKVHHRDIKPENLLGFRGEVKIADFGWSVHTPSLRRKTCGTL  | DYL     | 206 |
| lclIMM_00521979 | IEELADALTYCHERKVHHRDIKPENLLGLMGVEKIADFGWSVHTPSLRRRTTCGTL | DYL     | 200 |
| lclIMM_00049154 | IEELADALTYCHEKKVHHRDIKPENLLGLMGVEKIADFGWSVHTPSLRRRTTCGTL | DYL     | 200 |
| lclIMM_00561607 | MEELADALTYCHEKKVHHRDIKPENLLGFGKEVKIADFGWSVHTPSLRRKTCGTL  | DYL     | 204 |
| lclIMM_00694080 | MEELADALTYCHEKKVHHRDIKPENLLGFRGEVKIADFGWSVHTPSLRRKTCGTL  | DYL     | 204 |
| lclIMM_02109730 | MEELADALTYCHEKKVHHRDIKPENLLGFRGEVKIADFGWSVHTPSLRRKTCGTL  | DYL     | 195 |
| lclIMM_00150199 | MEELADALTYCHEKKVHHRDIKPENLLGFRGEVKIADFGWSVHTPSLRRKTCGTL  | DYL     | 201 |
| lclIMM_00443911 | MEELADALTYCHEKKVHHRDIKPENLLGFRGEVKIADFGWSVHTPSLRRKTCGTL  | DYL     | 201 |
| lclIMM_00824896 | MEELADALTYCHGGKVHHRDIKPENLLGFRGEVKIADFGWSVHTPSLRRKTCGTL  | DYL     | 189 |
| lclIMM_01453723 | MEELAHALAYCHENKVHHRDIKPENLLGLRGVEKIADFGWSVHTPSLRRKTCGTL  | DYL     | 196 |
| lclIMM_01273470 | IEELADALTYCHEKKVHHRDIKPENLLGYRGEVKIADFGWSVHTPSLRRKTCGTL  | DYL     | 193 |
| lclIMM_00340664 | MEELADALTYCHEKKVHHRDIKPENLLGFRGEVKIADFGWSVHTPSLRRKTCGTL  | DYL     | 203 |
| lclIMM_01992887 | MEELADALTYCHEKKVHHRDIKPENLLGFRGEVKIADFGWSVHTPSLRRKTCGTL  | DYL     | 193 |

lclIXM\_00561607 PPEMIERRTYNEKVDLWCIGVLCYELLVGYPFESPSHNETYRRILKVDLRFPPSLPLGA 264  
lclIXM\_00694080 PPEMIERRTYNETVDLWCIGVLCYELLVGNPPFESHSHNETYRRILKVDIRFPPSIPLGA 265  
lclIXM\_02109730 PPEMIEGRTYNEKVDLWCIGVLCYELLVGNPPFESASHNETYRRILKVDVRFPPSLPLGA 254  
lclIXM\_00150199 PPEMIEGRTYNEKVDLWCIGVLCYELLVGNPPFESASHNETYRRILKVDVRFPPSIPLGA 261  
lclIXM\_00443911 PPEMIEGRTYNEKVDLWCIGVLCYELLVGNPPFESASHNETYRRILKVDVRFPPSIPLGA 261  
lclIXM\_00824896 PPEMIEGRTYDEKVDLWCIGVLCYELLVGNPPFESVSHNETYRRILKVDVRFPPSIPLGA 249  
lclIXM\_01453723 PPEMVEQRTYSEMDLWCIGVLCYELLVGNPPFESSYSETYRRILKVDVRFPPSIPLGA 256  
lclIXM\_01273470 PPEMIEGRTYNEKVDLWCIGVLCYELLVGKPPFESSHNETYRRILKVDVRFPPSVPLGA 253  
lclIXM\_00340664 PPEMIEGRTYDERVDLWCIGVLCYELLVGNPPFESSHTNETYRRILKVDVRFPPSMPSGA 263  
lclIXM\_01992887 PPEMIEGRTYNEKVDLWCIGVLCYELLVGNPPFESPSHNETYRRILQVDVRFPPSMPLGA 253  
\*\*\*\*:\* \* :. \* \*\*\*\*.:\*\*\*\*\*:\*\*\* \*\*:: : \*\*\*.\* \* :\*. :\* : \*\*

lclINM\_198436.2 RDLISRLLKHNPSSQRPMLEVLHPWITANSKPSNCQNKESASKQS\*- 404  
lclIXM\_01514873 RDLISRLLKHNPSSQRPMLEVLHPWITANSKPSNCQNRVN\*----- 399  
lclINM\_00103802 RDLISRLLKHNPSSQRPTLKEVLHPWITANSKPSQCKKESTSKQS\*- 403  
lclINM\_00114250 RDLISRLLKHNPSSQRPTLKEVLHPWITANSKPSQCKKESTSKQS\*- 403  
lclIXM\_00563519 RDLISRLLKHNPSSQRPTLKEVLHPWITANSKPSQCKKESTSKQS\* 406  
lclIXM\_00398335 RDLISRLLKHNPSSQRPTLKEVLHPWITANSKPSQCKKESTGKQS\* 406  
lclIXM\_00567303 RDLISRLLKHNPSSHRPTLKEVLHPWITANSKPASSHKESTSKQP\*- 403  
lclIXM\_00148927 RDLISRLLKHNPSSQRPTLKEVLHPWITANSKPSQCKKESTSKQP\* 405  
lclIXM\_00443024 RDLISRLLKHNPSSQRPTLKEVLHPWITANSKPSQCKKESTSKQS\* 406  
lclIXM\_00827414 KDFISRLLKHNPSSHRPTLAELHPWVWKAQSSKPSQCKKESTSKQS\*- 403  
lclIXM\_01452869 RDLISRLLKHNPSSQRPTLKEVLHPWITANSKPSQCKKESTSKQS\* 405  
lclIXM\_00468690 RDLISRLLKHNPSSQRPTLKEVLHPWITANSKPSQCKKESTSKQS\* 406  
lclIXM\_00341990 RDLISRLLKHNPSSQRPTLKEVLHPWITANSKPSQCKKESTSKQS\*- 406  
lclIXM\_00432103 RDLISRLLKHNPSSQRPTLKEVLHPWITANSKPSQCKKESTSKQS\*- 403  
lclINM\_004217.3 QDLISKLLRHNPSSERLPLAQVSAHPWVRANSRRVLPSSALQSV\*----- 345  
lclIXM\_01511855 QDLISKLLRHNPSSERLPLAQVSAHPWVRANSRRVLPSSALQSV\*----- 345  
lclINM\_183084.2 QDLISKLLRHNPSSERLPLAQVSAHPWVRANSRRVLPSSALQSV\*----- 345  
lclIXM\_00401268 QDLISKLLRHNPSSERLPLAQVSAHPWVRANSRRVLPSSALQSV\*----- 345  
lclIXM\_844813.4 QDLISKLLRHNPSSERLPLAQVSAHPWVRANSRRVLPSSALQSV\*----- 345  
lclIXM\_00399619 QDLISKLLRHNPSSERLPLAQVSAHPWVRANSRRVLPSSALQSV\*----- 345  
lclINM\_213919.2 QDLISKLLRHNPSSERLPLAQVSAHPWVRANSRRVLPSSALQSV\*----- 345  
lclIXM\_00150481 QDLISKLLRHNPSSERLPLAQVSAHPWVRANSRRVLPSSALQSV\*----- 345  
lclIXM\_00443309 QDLISKLLRHNPSSERLPLAQVSAHPWVRANSRRVLPSSALQSV\*----- 345  
lclIXM\_00827074 QDLISKLLRHNPSSERLPLAQVSAHPWVRANSRRVLPSSALQSV\*----- 344  
lclIXM\_00587878 QDLISKLLRHNPSSERLPLAQVSAHPWVRANSRRVLPSSALQSV\*----- 340  
lclIXM\_00468461 QDLISKLLRHNPSSERLPLAQVSAHPWVRANSRRVLPSSALQSV\*----- 345  
lclIXM\_00341691 QDLISKLLRHNPSSERLPLAQVSAHPWVRANSRRVLPSSALQSV\*----- 346  
lclIXM\_01994424 QDLISKLLRHNPSSERLPLAQVSAHPWVRANSRRVLPSSALQSV\*----- 345  
lclINM\_00101587 RDLISRLLRYQPLERLPLAQILKHPWVQAHSRRVLPSCAQMAS\*----- 310  
lclIXM\_00109836 RDLISKLLRYQPLERLPLAQILKHPWVQAHSRRVLPSCAQMAS\*----- 310  
lclIXM\_00521979 RDLISKLLRFQPLERLPLVRVLEHPWIRAHSSRRVLPSSVPMF\*----- 304  
lclIXM\_00401544 RDLISKLLRFQPLERLPLVRVLEHPWIRAHSSRRVLPSSVPMF\*----- 304  
lclIXM\_00561607 QDLVSKLLRYQPLERLPLAQIMEHPWVRANSRRVLPSSVQMAS\*----- 308  
lclIXM\_00694080 RDLISKLLRYQPLERLPLSQILEHPWVRANSRRVLPSSVQMAS\*----- 309  
lclIXM\_02109730 QDLISRLLRYQPSDRLLDQILEHPWVRANSRRVLPSTQMV\*----- 298  
lclIXM\_00150199 KDLISKLLRYQPLERLPLDQILEHPWVRANSRRVLPSSAQMAS\*----- 305  
lclIXM\_00443911 KDLISKLLRYQPLERLPLDQIMEHPWVRANSRRVLPSSAQMAS\*----- 305  
lclIXM\_00824896 RDLISRLLRYQPSERLPLAQILRHPWVQAHSRRVLPSCAHPAS\*----- 293  
lclIXM\_01453723 QDLISKLLRYQPSERLPLAQVLEHPWVQAHSRRVLPSCAHPAS\*----- 300  
lclIXM\_01273470 QDLISSLLRYQPSERLPLAQILQHPWVRANSRRVLPSCAHPAS\*----- 297  
lclIXM\_00340664 QDLISKLLRYQPFERLALAQVLEHPWVQAHSRRVLPSCAHPAS\*----- 307  
lclIXM\_01992887 QDLISKLLRYQPSERLPLVQILEHPWVRANSRRVLPSCAHPAS\*----- 297  
\*: : \*\* :.\* \* : \*\*\*: : :
